# Supplementary material for: FLMatchQA: a recursive neural network-based question answering with customized federated learning model
Source: PeerJ journal article supplement (doi:10.7717/peerj-cs.2092), 2024-06-28
Supplement: FLQA_Dataset.zip [file FLQA_Dataset.zip]

## Sheet: FLQA
SI.No	Context	Question	People ID	Answer	Text
1	A deterministic Turing machine is the most basic Turing machine, which uses a fixed set of rules to determine its future actions. A probabilistic Turing machine is a deterministic Turing machine with an extra supply of random bits. The ability to make probabilistic decisions often helps algorithms solve problems more efficiently. Algorithms that use random bits are called randomized algorithms. A…	What is generally considered to be the most basic iteration of a Turing machine?	56e1aff7cd28a01900c67a68	2	deterministic Turing machine
2	A deterministic Turing machine is the most basic Turing machine, which uses a fixed set of rules to determine its future actions. A probabilistic Turing machine is a deterministic Turing machine with an extra supply of random bits. The ability to make probabilistic decisions often helps algorithms solve problems more efficiently. Algorithms that use random bits are called randomized algorithms. A…	What fixed set of factors determine the actions of a deterministic Turing machine	56e1aff7cd28a01900c67a69	91	rules
3	A deterministic Turing machine is the most basic Turing machine, which uses a fixed set of rules to determine its future actions. A probabilistic Turing machine is a deterministic Turing machine with an extra supply of random bits. The ability to make probabilistic decisions often helps algorithms solve problems more efficiently. Algorithms that use random bits are called randomized algorithms. A…	What fixed set of factors determine the actions of a deterministic Turing machine	56e1aff7cd28a01900c67a69	76	a fixed set of rules to determine its future actions
4	A deterministic Turing machine is the most basic Turing machine, which uses a fixed set of rules to determine its future actions. A probabilistic Turing machine is a deterministic Turing machine with an extra supply of random bits. The ability to make probabilistic decisions often helps algorithms solve problems more efficiently. Algorithms that use random bits are called randomized algorithms. A…	What is the term used to identify a deterministic Turing machine that has additional random bits?	56e1aff7cd28a01900c67a6a	130	A probabilistic Turing machine
5	A deterministic Turing machine is the most basic Turing machine, which uses a fixed set of rules to determine its future actions. A probabilistic Turing machine is a deterministic Turing machine with an extra supply of random bits. The ability to make probabilistic decisions often helps algorithms solve problems more efficiently. Algorithms that use random bits are called randomized algorithms. A…	What is the term used to identify a deterministic Turing machine that has additional random bits?	56e1aff7cd28a01900c67a6a	132	probabilistic
6	A deterministic Turing machine is the most basic Turing machine, which uses a fixed set of rules to determine its future actions. A probabilistic Turing machine is a deterministic Turing machine with an extra supply of random bits. The ability to make probabilistic decisions often helps algorithms solve problems more efficiently. Algorithms that use random bits are called randomized algorithms. A…	What is the term used to identify a deterministic Turing machine that has additional random bits?	56e1aff7cd28a01900c67a6a	132	probabilistic Turing machine
7	A deterministic Turing machine is the most basic Turing machine, which uses a fixed set of rules to determine its future actions. A probabilistic Turing machine is a deterministic Turing machine with an extra supply of random bits. The ability to make probabilistic decisions often helps algorithms solve problems more efficiently. Algorithms that use random bits are called randomized algorithms. A…	What type of Turing machine is capable of multiple actions and extends into a variety of computational paths?	56e1aff7cd28a01900c67a6b	398	A non-deterministic Turing machine
8	A deterministic Turing machine is the most basic Turing machine, which uses a fixed set of rules to determine its future actions. A probabilistic Turing machine is a deterministic Turing machine with an extra supply of random bits. The ability to make probabilistic decisions often helps algorithms solve problems more efficiently. Algorithms that use random bits are called randomized algorithms. A…	What type of Turing machine is capable of multiple actions and extends into a variety of computational paths?	56e1aff7cd28a01900c67a6b	400	non-deterministic
9	A deterministic Turing machine is the most basic Turing machine, which uses a fixed set of rules to determine its future actions. A probabilistic Turing machine is a deterministic Turing machine with an extra supply of random bits. The ability to make probabilistic decisions often helps algorithms solve problems more efficiently. Algorithms that use random bits are called randomized algorithms. A…	What type of Turing machine is capable of multiple actions and extends into a variety of computational paths?	56e1aff7cd28a01900c67a6b	400	non-deterministic Turing machine
10	A deterministic Turing machine is the most basic Turing machine, which uses a fixed set of rules to determine its future actions. A probabilistic Turing machine is a deterministic Turing machine with an extra supply of random bits. The ability to make probabilistic decisions often helps algorithms solve problems more efficiently. Algorithms that use random bits are called randomized algorithms. A…	What is the term given to algorithms that utilize random bits?	56e1aff7cd28a01900c67a6c	375	randomized algorithms
11	Many types of Turing machines are used to define complexity classes, such as deterministic Turing machines, probabilistic Turing machines, non-deterministic Turing machines, quantum Turing machines, symmetric Turing machines and alternating Turing machines. They are all equally powerful in principle, but when resources (such as time or space) are bounded, some of these may be more powerful than o…	Turing machines are commonly employed to define what?	56e1b00ce3433e140042309e	49	complexity classes
12	Many types of Turing machines are used to define complexity classes, such as deterministic Turing machines, probabilistic Turing machines, non-deterministic Turing machines, quantum Turing machines, symmetric Turing machines and alternating Turing machines. They are all equally powerful in principle, but when resources (such as time or space) are bounded, some of these may be more powerful than o…	What are two factors that directly effect how powerful a Turing machine may or may not be?	56e1b00ce3433e140042309f	330	time or space
13	Many types of Turing machines are used to define complexity classes, such as deterministic Turing machines, probabilistic Turing machines, non-deterministic Turing machines, quantum Turing machines, symmetric Turing machines and alternating Turing machines. They are all equally powerful in principle, but when resources (such as time or space) are bounded, some of these may be more powerful than o…	In the determination of complexity classes, what are two examples of types of Turing machines?	56e1b00ce3433e14004230a1	108	probabilistic Turing machines, non-deterministic Turing machines
14	Many machine models different from the standard multi-tape Turing machines have been proposed in the literature, for example random access machines. Perhaps surprisingly, each of these models can be converted to another without providing any extra computational power. The time and memory consumption of these alternate models may vary. What all these models have in common is that the machines oper…	What is an example of a machine model that deviates from a generally accepted multi-tape Turing machine?	56e1b169cd28a01900c67a72	125	random access machines
15	Many machine models different from the standard multi-tape Turing machines have been proposed in the literature, for example random access machines. Perhaps surprisingly, each of these models can be converted to another without providing any extra computational power. The time and memory consumption of these alternate models may vary. What all these models have in common is that the machines oper…	In considering Turing machines and alternate variables, what measurement left unaffected by conversion between machine models?	56e1b169cd28a01900c67a73	248	computational power
16	Many machine models different from the standard multi-tape Turing machines have been proposed in the literature, for example random access machines. Perhaps surprisingly, each of these models can be converted to another without providing any extra computational power. The time and memory consumption of these alternate models may vary. What all these models have in common is that the machines oper…	What two resources commonly consumed by alternate models are typically known to vary?	56e1b169cd28a01900c67a74	273	time and memory
17	Many machine models different from the standard multi-tape Turing machines have been proposed in the literature, for example random access machines. Perhaps surprisingly, each of these models can be converted to another without providing any extra computational power. The time and memory consumption of these alternate models may vary. What all these models have in common is that the machines oper…	What two resources commonly consumed by alternate models are typically known to vary?	56e1b169cd28a01900c67a74	273	time and memory consumption
18	Many machine models different from the standard multi-tape Turing machines have been proposed in the literature, for example random access machines. Perhaps surprisingly, each of these models can be converted to another without providing any extra computational power. The time and memory consumption of these alternate models may vary. What all these models have in common is that the machines oper…	What commonality do alternate machine models, such as random access machines, share with Turing machines?	56e1b169cd28a01900c67a75	382	the machines operate deterministically
19	Many machine models different from the standard multi-tape Turing machines have been proposed in the literature, for example random access machines. Perhaps surprisingly, each of these models can be converted to another without providing any extra computational power. The time and memory consumption of these alternate models may vary. What all these models have in common is that the machines oper…	What commonality do alternate machine models, such as random access machines, share with Turing machines?	56e1b169cd28a01900c67a75	403	deterministically
20	However, some computational problems are easier to analyze in terms of more unusual resources. For example, a non-deterministic Turing machine is a computational model that is allowed to branch out to check many different possibilities at once. The non-deterministic Turing machine has very little to do with how we physically want to compute algorithms, but its branching exactly captures many of t…	What type of Turing machine can be characterized by checking multiple possibilities at the same time?	56e1b355e3433e14004230b0	110	non-deterministic
21	However, some computational problems are easier to analyze in terms of more unusual resources. For example, a non-deterministic Turing machine is a computational model that is allowed to branch out to check many different possibilities at once. The non-deterministic Turing machine has very little to do with how we physically want to compute algorithms, but its branching exactly captures many of t…	What type of Turing machine can be characterized by checking multiple possibilities at the same time?	56e1b355e3433e14004230b0	110	non-deterministic Turing machine
22	However, some computational problems are easier to analyze in terms of more unusual resources. For example, a non-deterministic Turing machine is a computational model that is allowed to branch out to check many different possibilities at once. The non-deterministic Turing machine has very little to do with how we physically want to compute algorithms, but its branching exactly captures many of t…	What often affects or facilitates ease of analysis in computational problems?	56e1b355e3433e14004230b1	76	unusual resources
23	However, some computational problems are easier to analyze in terms of more unusual resources. For example, a non-deterministic Turing machine is a computational model that is allowed to branch out to check many different possibilities at once. The non-deterministic Turing machine has very little to do with how we physically want to compute algorithms, but its branching exactly captures many of t…	What often affects or facilitates ease of analysis in computational problems?	56e1b355e3433e14004230b1	71	more unusual resources
24	However, some computational problems are easier to analyze in terms of more unusual resources. For example, a non-deterministic Turing machine is a computational model that is allowed to branch out to check many different possibilities at once. The non-deterministic Turing machine has very little to do with how we physically want to compute algorithms, but its branching exactly captures many of t…	A non-deterministic Turing machine has the ability to capture what facet of useful analysis?	56e1b355e3433e14004230b2	402	mathematical models
25	However, some computational problems are easier to analyze in terms of more unusual resources. For example, a non-deterministic Turing machine is a computational model that is allowed to branch out to check many different possibilities at once. The non-deterministic Turing machine has very little to do with how we physically want to compute algorithms, but its branching exactly captures many of t…	A non-deterministic Turing machine has the ability to capture what facet of useful analysis?	56e1b355e3433e14004230b2	363	branching
26	However, some computational problems are easier to analyze in terms of more unusual resources. For example, a non-deterministic Turing machine is a computational model that is allowed to branch out to check many different possibilities at once. The non-deterministic Turing machine has very little to do with how we physically want to compute algorithms, but its branching exactly captures many of t…	What is the most critical resource in the analysis of computational problems associated with non-deterministic Turing machines?	56e1b355e3433e14004230b3	468	time
27	However, some computational problems are easier to analyze in terms of more unusual resources. For example, a non-deterministic Turing machine is a computational model that is allowed to branch out to check many different possibilities at once. The non-deterministic Turing machine has very little to do with how we physically want to compute algorithms, but its branching exactly captures many of t…	What is the most critical resource in the analysis of computational problems associated with non-deterministic Turing machines?	56e1b355e3433e14004230b3	450	non-deterministic time
28	For a precise definition of what it means to solve a problem using a given amount of time and space, a computational model such as the deterministic Turing machine is used. The time required by a deterministic Turing machine M on input x is the total number of state transitions, or steps, the machine makes before it halts and outputs the answer ("yes" or "no"). A Turing machine M is said to opera…	The time required to output an answer on a deterministic Turing machine is expressed as what?	56e1b62ecd28a01900c67aa3	261	state transitions
29	For a precise definition of what it means to solve a problem using a given amount of time and space, a computational model such as the deterministic Turing machine is used. The time required by a deterministic Turing machine M on input x is the total number of state transitions, or steps, the machine makes before it halts and outputs the answer ("yes" or "no"). A Turing machine M is said to opera…	The time required to output an answer on a deterministic Turing machine is expressed as what?	56e1b62ecd28a01900c67aa3	241	the total number of state transitions, or steps
30	For a precise definition of what it means to solve a problem using a given amount of time and space, a computational model such as the deterministic Turing machine is used. The time required by a deterministic Turing machine M on input x is the total number of state transitions, or steps, the machine makes before it halts and outputs the answer ("yes" or "no"). A Turing machine M is said to opera…	The time required to output an answer on a deterministic Turing machine is expressed as what?	56e1b62ecd28a01900c67aa3	245	total number of state transitions, or steps, the machine makes before it halts and outputs the answer
31	For a precise definition of what it means to solve a problem using a given amount of time and space, a computational model such as the deterministic Turing machine is used. The time required by a deterministic Turing machine M on input x is the total number of state transitions, or steps, the machine makes before it halts and outputs the answer ("yes" or "no"). A Turing machine M is said to opera…	Complexity theory classifies problems based on what primary attribute?	56e1b62ecd28a01900c67aa4	695	difficulty
32	For a precise definition of what it means to solve a problem using a given amount of time and space, a computational model such as the deterministic Turing machine is used. The time required by a deterministic Turing machine M on input x is the total number of state transitions, or steps, the machine makes before it halts and outputs the answer ("yes" or "no"). A Turing machine M is said to opera…	What is the expression used to identify any given series of problems capable of being solved within time on a deterministic Turing machine?	56e1b62ecd28a01900c67aa5	873	DTIME(f(n))
33	For a precise definition of what it means to solve a problem using a given amount of time and space, a computational model such as the deterministic Turing machine is used. The time required by a deterministic Turing machine M on input x is the total number of state transitions, or steps, the machine makes before it halts and outputs the answer ("yes" or "no"). A Turing machine M is said to opera…	What is the expression used to identify any given series of problems capable of being solved within time on a deterministic Turing machine?	56e1b62ecd28a01900c67aa5	873	DTIME(f(n)).
34	For a precise definition of what it means to solve a problem using a given amount of time and space, a computational model such as the deterministic Turing machine is used. The time required by a deterministic Turing machine M on input x is the total number of state transitions, or steps, the machine makes before it halts and outputs the answer ("yes" or "no"). A Turing machine M is said to opera…	What is the most critical resource measured to in assessing the determination of a Turing machine's ability to solve any given set of problems?	56e1b62ecd28a01900c67aa6	85	time
35	For a precise definition of what it means to solve a problem using a given amount of time and space, a computational model such as the deterministic Turing machine is used. The time required by a deterministic Turing machine M on input x is the total number of state transitions, or steps, the machine makes before it halts and outputs the answer ("yes" or "no"). A Turing machine M is said to opera…	What is the most critical resource measured to in assessing the determination of a Turing machine's ability to solve any given set of problems?	56e1b62ecd28a01900c67aa6	583	time
36	Analogous definitions can be made for space requirements. Although time and space are the most well-known complexity resources, any complexity measure can be viewed as a computational resource. Complexity measures are very generally defined by the Blum complexity axioms. Other complexity measures used in complexity theory include communication complexity, circuit complexity, and decision tree com…	Time and space are both examples of what type of resource?	56e1b754cd28a01900c67abc	106	complexity resources
37	Analogous definitions can be made for space requirements. Although time and space are the most well-known complexity resources, any complexity measure can be viewed as a computational resource. Complexity measures are very generally defined by the Blum complexity axioms. Other complexity measures used in complexity theory include communication complexity, circuit complexity, and decision tree com…	Time and space are both examples of what type of resource?	56e1b754cd28a01900c67abc	106	complexity
38	Analogous definitions can be made for space requirements. Although time and space are the most well-known complexity resources, any complexity measure can be viewed as a computational resource. Complexity measures are very generally defined by the Blum complexity axioms. Other complexity measures used in complexity theory include communication complexity, circuit complexity, and decision tree com…	A complexity resource can also be described as what other type of resource?	56e1b754cd28a01900c67abd	170	computational resource
39	Analogous definitions can be made for space requirements. Although time and space are the most well-known complexity resources, any complexity measure can be viewed as a computational resource. Complexity measures are very generally defined by the Blum complexity axioms. Other complexity measures used in complexity theory include communication complexity, circuit complexity, and decision tree com…	A complexity resource can also be described as what other type of resource?	56e1b754cd28a01900c67abd	170	computational
40	Analogous definitions can be made for space requirements. Although time and space are the most well-known complexity resources, any complexity measure can be viewed as a computational resource. Complexity measures are very generally defined by the Blum complexity axioms. Other complexity measures used in complexity theory include communication complexity, circuit complexity, and decision tree com…	What is typically used to broadly define complexity measures?	56e1b754cd28a01900c67abe	248	Blum complexity axioms
41	Analogous definitions can be made for space requirements. Although time and space are the most well-known complexity resources, any complexity measure can be viewed as a computational resource. Complexity measures are very generally defined by the Blum complexity axioms. Other complexity measures used in complexity theory include communication complexity, circuit complexity, and decision tree com…	What is typically used to broadly define complexity measures?	56e1b754cd28a01900c67abe	244	the Blum complexity axioms
42	Analogous definitions can be made for space requirements. Although time and space are the most well-known complexity resources, any complexity measure can be viewed as a computational resource. Complexity measures are very generally defined by the Blum complexity axioms. Other complexity measures used in complexity theory include communication complexity, circuit complexity, and decision tree com…	Communication complexity is an example of what type of measure?	56e1b754cd28a01900c67abf	194	Complexity measures
43	Analogous definitions can be made for space requirements. Although time and space are the most well-known complexity resources, any complexity measure can be viewed as a computational resource. Complexity measures are very generally defined by the Blum complexity axioms. Other complexity measures used in complexity theory include communication complexity, circuit complexity, and decision tree com…	Communication complexity is an example of what type of measure?	56e1b754cd28a01900c67abf	278	complexity measures
44	Analogous definitions can be made for space requirements. Although time and space are the most well-known complexity resources, any complexity measure can be viewed as a computational resource. Complexity measures are very generally defined by the Blum complexity axioms. Other complexity measures used in complexity theory include communication complexity, circuit complexity, and decision tree com…	Communication complexity is an example of what type of measure?	56e1b754cd28a01900c67abf	278	complexity
45	Analogous definitions can be made for space requirements. Although time and space are the most well-known complexity resources, any complexity measure can be viewed as a computational resource. Complexity measures are very generally defined by the Blum complexity axioms. Other complexity measures used in complexity theory include communication complexity, circuit complexity, and decision tree com…	Decision tree is an example of what type of measure?	56e1b754cd28a01900c67ac0	194	Complexity measures
46	Analogous definitions can be made for space requirements. Although time and space are the most well-known complexity resources, any complexity measure can be viewed as a computational resource. Complexity measures are very generally defined by the Blum complexity axioms. Other complexity measures used in complexity theory include communication complexity, circuit complexity, and decision tree com…	Decision tree is an example of what type of measure?	56e1b754cd28a01900c67ac0	278	complexity measures
47	Analogous definitions can be made for space requirements. Although time and space are the most well-known complexity resources, any complexity measure can be viewed as a computational resource. Complexity measures are very generally defined by the Blum complexity axioms. Other complexity measures used in complexity theory include communication complexity, circuit complexity, and decision tree com…	Decision tree is an example of what type of measure?	56e1b754cd28a01900c67ac0	396	complexity
48	The best, worst and average case complexity refer to three different ways of measuring the time complexity (or any other complexity measure) of different inputs of the same size. Since some inputs of size n may be faster to solve than others, we define the following complexities:	What are the three primary expressions used to represent case complexity?	56e1b8f3e3433e14004230e6	4	best, worst and average
49	The best, worst and average case complexity refer to three different ways of measuring the time complexity (or any other complexity measure) of different inputs of the same size. Since some inputs of size n may be faster to solve than others, we define the following complexities:	What are the three primary expressions used to represent case complexity?	56e1b8f3e3433e14004230e6	4	best, worst and average case
50	The best, worst and average case complexity refer to three different ways of measuring the time complexity (or any other complexity measure) of different inputs of the same size. Since some inputs of size n may be faster to solve than others, we define the following complexities:	What are the three primary expressions used to represent case complexity?	56e1b8f3e3433e14004230e6	4	best, worst and average case complexity
51	The best, worst and average case complexity refer to three different ways of measuring the time complexity (or any other complexity measure) of different inputs of the same size. Since some inputs of size n may be faster to solve than others, we define the following complexities:	Case complexity likelihoods provide variable probabilities of what general measure?	56e1b8f3e3433e14004230e7	121	complexity measure
52	The best, worst and average case complexity refer to three different ways of measuring the time complexity (or any other complexity measure) of different inputs of the same size. Since some inputs of size n may be faster to solve than others, we define the following complexities:	Case complexity likelihoods provide variable probabilities of what general measure?	56e1b8f3e3433e14004230e7	121	complexity
53	The best, worst and average case complexity refer to three different ways of measuring the time complexity (or any other complexity measure) of different inputs of the same size. Since some inputs of size n may be faster to solve than others, we define the following complexities:	What is one common example of a critical complexity measure?	56e1b8f3e3433e14004230e8	91	time
54	The best, worst and average case complexity refer to three different ways of measuring the time complexity (or any other complexity measure) of different inputs of the same size. Since some inputs of size n may be faster to solve than others, we define the following complexities:	What is one common example of a critical complexity measure?	56e1b8f3e3433e14004230e8	91	time complexity
55	The best, worst and average case complexity refer to three different ways of measuring the time complexity (or any other complexity measure) of different inputs of the same size. Since some inputs of size n may be faster to solve than others, we define the following complexities:	Case complexities provide three likelihoods of what differing variable that remains the same size?	56e1b8f3e3433e14004230e9	154	inputs
56	For example, consider the deterministic sorting algorithm quicksort. This solves the problem of sorting a list of integers that is given as the input. The worst-case is when the input is sorted or sorted in reverse order, and the algorithm takes time O(n2) for this case. If we assume that all possible permutations of the input list are equally likely, the average time taken for sorting is O(n log…	What provides a solution to a list of integers provided as input that ned to be sorted?	56e1ba41cd28a01900c67ae0	26	deterministic sorting algorithm quicksort
57	For example, consider the deterministic sorting algorithm quicksort. This solves the problem of sorting a list of integers that is given as the input. The worst-case is when the input is sorted or sorted in reverse order, and the algorithm takes time O(n2) for this case. If we assume that all possible permutations of the input list are equally likely, the average time taken for sorting is O(n log…	What provides a solution to a list of integers provided as input that ned to be sorted?	56e1ba41cd28a01900c67ae0	58	quicksort
58	For example, consider the deterministic sorting algorithm quicksort. This solves the problem of sorting a list of integers that is given as the input. The worst-case is when the input is sorted or sorted in reverse order, and the algorithm takes time O(n2) for this case. If we assume that all possible permutations of the input list are equally likely, the average time taken for sorting is O(n log…	What provides a solution to a list of integers provided as input that ned to be sorted?	56e1ba41cd28a01900c67ae0	22	the deterministic sorting algorithm quicksort
59	For example, consider the deterministic sorting algorithm quicksort. This solves the problem of sorting a list of integers that is given as the input. The worst-case is when the input is sorted or sorted in reverse order, and the algorithm takes time O(n2) for this case. If we assume that all possible permutations of the input list are equally likely, the average time taken for sorting is O(n log…	When extensive time is required to sort integers, this represents what case complexity?	56e1ba41cd28a01900c67ae1	155	worst-case
60	For example, consider the deterministic sorting algorithm quicksort. This solves the problem of sorting a list of integers that is given as the input. The worst-case is when the input is sorted or sorted in reverse order, and the algorithm takes time O(n2) for this case. If we assume that all possible permutations of the input list are equally likely, the average time taken for sorting is O(n log…	When extensive time is required to sort integers, this represents what case complexity?	56e1ba41cd28a01900c67ae1	155	worst
61	For example, consider the deterministic sorting algorithm quicksort. This solves the problem of sorting a list of integers that is given as the input. The worst-case is when the input is sorted or sorted in reverse order, and the algorithm takes time O(n2) for this case. If we assume that all possible permutations of the input list are equally likely, the average time taken for sorting is O(n log…	What is the expression used to denote a worst case complexity as expressed by time taken?	56e1ba41cd28a01900c67ae2	251	O(n2)
62	To classify the computation time (or similar resources, such as space consumption), one is interested in proving upper and lower bounds on the minimum amount of time required by the most efficient algorithm solving a given problem. The complexity of an algorithm is usually taken to be its worst-case complexity, unless specified otherwise. Analyzing a particular algorithm falls under the field of …	Classification of resources is contingent on determining the upper and lower bounds of minimum time required by what?	56e1bc3ae3433e1400423104	178	the most efficient algorithm
63	To classify the computation time (or similar resources, such as space consumption), one is interested in proving upper and lower bounds on the minimum amount of time required by the most efficient algorithm solving a given problem. The complexity of an algorithm is usually taken to be its worst-case complexity, unless specified otherwise. Analyzing a particular algorithm falls under the field of …	Classification of resources is contingent on determining the upper and lower bounds of minimum time required by what?	56e1bc3ae3433e1400423104	178	the most efficient algorithm solving a given problem
64	To classify the computation time (or similar resources, such as space consumption), one is interested in proving upper and lower bounds on the minimum amount of time required by the most efficient algorithm solving a given problem. The complexity of an algorithm is usually taken to be its worst-case complexity, unless specified otherwise. Analyzing a particular algorithm falls under the field of …	The analysis of a specific algorithm is typically assigned to what field of computational science?	56e1bc3ae3433e1400423105	399	analysis of algorithms
65	To classify the computation time (or similar resources, such as space consumption), one is interested in proving upper and lower bounds on the minimum amount of time required by the most efficient algorithm solving a given problem. The complexity of an algorithm is usually taken to be its worst-case complexity, unless specified otherwise. Analyzing a particular algorithm falls under the field of …	Which bound of time is more difficult to establish?	56e1bc3ae3433e1400423106	123	lower bounds
66	To classify the computation time (or similar resources, such as space consumption), one is interested in proving upper and lower bounds on the minimum amount of time required by the most efficient algorithm solving a given problem. The complexity of an algorithm is usually taken to be its worst-case complexity, unless specified otherwise. Analyzing a particular algorithm falls under the field of …	Which bound of time is more difficult to establish?	56e1bc3ae3433e1400423106	597	lower
67	To classify the computation time (or similar resources, such as space consumption), one is interested in proving upper and lower bounds on the minimum amount of time required by the most efficient algorithm solving a given problem. The complexity of an algorithm is usually taken to be its worst-case complexity, unless specified otherwise. Analyzing a particular algorithm falls under the field of …	Which bound of time is more difficult to establish?	56e1bc3ae3433e1400423106	597	lower bounds
68	To classify the computation time (or similar resources, such as space consumption), one is interested in proving upper and lower bounds on the minimum amount of time required by the most efficient algorithm solving a given problem. The complexity of an algorithm is usually taken to be its worst-case complexity, unless specified otherwise. Analyzing a particular algorithm falls under the field of …	A specific algorithm demonstrating T(n) represents what measure of time complexity?	56e1bc3ae3433e1400423107	434	upper bound
69	To classify the computation time (or similar resources, such as space consumption), one is interested in proving upper and lower bounds on the minimum amount of time required by the most efficient algorithm solving a given problem. The complexity of an algorithm is usually taken to be its worst-case complexity, unless specified otherwise. Analyzing a particular algorithm falls under the field of …	A specific algorithm demonstrating T(n) represents what measure of time complexity?	56e1bc3ae3433e1400423107	113	upper and lower bounds
70	To classify the computation time (or similar resources, such as space consumption), one is interested in proving upper and lower bounds on the minimum amount of time required by the most efficient algorithm solving a given problem. The complexity of an algorithm is usually taken to be its worst-case complexity, unless specified otherwise. Analyzing a particular algorithm falls under the field of …	What is the colloquial phrase used to convey the continuum of algorithms with unlimited availability irrespective of time?	56e1bc3ae3433e1400423108	676	all possible algorithms
71	To classify the computation time (or similar resources, such as space consumption), one is interested in proving upper and lower bounds on the minimum amount of time required by the most efficient algorithm solving a given problem. The complexity of an algorithm is usually taken to be its worst-case complexity, unless specified otherwise. Analyzing a particular algorithm falls under the field of …	What is the colloquial phrase used to convey the continuum of algorithms with unlimited availability irrespective of time?	56e1bc3ae3433e1400423108	740	all possible algorithms
72	Upper and lower bounds are usually stated using the big O notation, which hides constant factors and smaller terms. This makes the bounds independent of the specific details of the computational model used. For instance, if T(n) = 7n2 + 15n + 40, in big O notation one would write T(n) = O(n2).	What expression is generally used to convey upper or lower bounds?	56e1bd4acd28a01900c67afc	52	big O notation
73	Upper and lower bounds are usually stated using the big O notation, which hides constant factors and smaller terms. This makes the bounds independent of the specific details of the computational model used. For instance, if T(n) = 7n2 + 15n + 40, in big O notation one would write T(n) = O(n2).	What does a big O notation hide?	56e1bd4acd28a01900c67afd	80	constant factors and smaller terms
74	Upper and lower bounds are usually stated using the big O notation, which hides constant factors and smaller terms. This makes the bounds independent of the specific details of the computational model used. For instance, if T(n) = 7n2 + 15n + 40, in big O notation one would write T(n) = O(n2).	How would one write T(n) = 7n2 + 15n + 40 in big O notation?	56e1bd4acd28a01900c67afe	281	T(n) = O(n2)
75	Upper and lower bounds are usually stated using the big O notation, which hides constant factors and smaller terms. This makes the bounds independent of the specific details of the computational model used. For instance, if T(n) = 7n2 + 15n + 40, in big O notation one would write T(n) = O(n2).	Big O notation provides autonomy to upper and lower bounds with relationship to what?	56e1bd4acd28a01900c67aff	177	the computational model
76	Upper and lower bounds are usually stated using the big O notation, which hides constant factors and smaller terms. This makes the bounds independent of the specific details of the computational model used. For instance, if T(n) = 7n2 + 15n + 40, in big O notation one would write T(n) = O(n2).	Big O notation provides autonomy to upper and lower bounds with relationship to what?	56e1bd4acd28a01900c67aff	157	specific details of the computational model used
77	Upper and lower bounds are usually stated using the big O notation, which hides constant factors and smaller terms. This makes the bounds independent of the specific details of the computational model used. For instance, if T(n) = 7n2 + 15n + 40, in big O notation one would write T(n) = O(n2).	Big O notation provides autonomy to upper and lower bounds with relationship to what?	56e1bd4acd28a01900c67aff	153	the specific details of the computational model used
78	Of course, some complexity classes have complicated definitions that do not fit into this framework. Thus, a typical complexity class has a definition like the following:	What has complicated definitions that prevent classification into a framework?	56e1c0f6cd28a01900c67b2c	16	complexity classes
79	Of course, some complexity classes have complicated definitions that do not fit into this framework. Thus, a typical complexity class has a definition like the following:	What has complicated definitions that prevent classification into a framework?	56e1c0f6cd28a01900c67b2c	11	some complexity classes
80	Of course, some complexity classes have complicated definitions that do not fit into this framework. Thus, a typical complexity class has a definition like the following:	Complexity classes are generally classified into what?	56e1c0f6cd28a01900c67b2d	90	framework
81	Of course, some complexity classes have complicated definitions that do not fit into this framework. Thus, a typical complexity class has a definition like the following:	Difficulty in establishing a framework for complexity classes can be caused by what variable?	56e1c0f6cd28a01900c67b2e	40	complicated definitions
82	Of course, some complexity classes have complicated definitions that do not fit into this framework. Thus, a typical complexity class has a definition like the following:	Difficulty in establishing a framework for complexity classes can be caused by what variable?	56e1c0f6cd28a01900c67b2e	52	definitions
83	But bounding the computation time above by some concrete function f(n) often yields complexity classes that depend on the chosen machine model. For instance, the language {xx | x is any binary string} can be solved in linear time on a multi-tape Turing machine, but necessarily requires quadratic time in the model of single-tape Turing machines. If we allow polynomial variations in running time, C…	Concrete bounding of computation time frequently produces complexity classes contingent upon what?	56e1c2eee3433e1400423134	122	chosen machine model
84	But bounding the computation time above by some concrete function f(n) often yields complexity classes that depend on the chosen machine model. For instance, the language {xx | x is any binary string} can be solved in linear time on a multi-tape Turing machine, but necessarily requires quadratic time in the model of single-tape Turing machines. If we allow polynomial variations in running time, C…	Concrete bounding of computation time frequently produces complexity classes contingent upon what?	56e1c2eee3433e1400423134	118	the chosen machine model
85	But bounding the computation time above by some concrete function f(n) often yields complexity classes that depend on the chosen machine model. For instance, the language {xx | x is any binary string} can be solved in linear time on a multi-tape Turing machine, but necessarily requires quadratic time in the model of single-tape Turing machines. If we allow polynomial variations in running time, C…	A multi-tape Turing machine requires what type of time for a solution?	56e1c2eee3433e1400423135	218	linear time
86	But bounding the computation time above by some concrete function f(n) often yields complexity classes that depend on the chosen machine model. For instance, the language {xx | x is any binary string} can be solved in linear time on a multi-tape Turing machine, but necessarily requires quadratic time in the model of single-tape Turing machines. If we allow polynomial variations in running time, C…	A multi-tape Turing machine requires what type of time for a solution?	56e1c2eee3433e1400423135	218	linear
87	But bounding the computation time above by some concrete function f(n) often yields complexity classes that depend on the chosen machine model. For instance, the language {xx | x is any binary string} can be solved in linear time on a multi-tape Turing machine, but necessarily requires quadratic time in the model of single-tape Turing machines. If we allow polynomial variations in running time, C…	A language solved in quadratic time implies the use of what type of Turing machine?	56e1c2eee3433e1400423136	318	single-tape Turing machines
88	But bounding the computation time above by some concrete function f(n) often yields complexity classes that depend on the chosen machine model. For instance, the language {xx | x is any binary string} can be solved in linear time on a multi-tape Turing machine, but necessarily requires quadratic time in the model of single-tape Turing machines. If we allow polynomial variations in running time, C…	A language solved in quadratic time implies the use of what type of Turing machine?	56e1c2eee3433e1400423136	318	single-tape
89	But bounding the computation time above by some concrete function f(n) often yields complexity classes that depend on the chosen machine model. For instance, the language {xx | x is any binary string} can be solved in linear time on a multi-tape Turing machine, but necessarily requires quadratic time in the model of single-tape Turing machines. If we allow polynomial variations in running time, C…	What thesis specifies that a polynomial relationship exists within time complexities in a computational model?	56e1c2eee3433e1400423137	398	Cobham-Edmonds thesis
90	But bounding the computation time above by some concrete function f(n) often yields complexity classes that depend on the chosen machine model. For instance, the language {xx | x is any binary string} can be solved in linear time on a multi-tape Turing machine, but necessarily requires quadratic time in the model of single-tape Turing machines. If we allow polynomial variations in running time, C…	What thesis specifies that a polynomial relationship exists within time complexities in a computational model?	56e1c2eee3433e1400423137	398	Cobham-Edmonds
91	But bounding the computation time above by some concrete function f(n) often yields complexity classes that depend on the chosen machine model. For instance, the language {xx | x is any binary string} can be solved in linear time on a multi-tape Turing machine, but necessarily requires quadratic time in the model of single-tape Turing machines. If we allow polynomial variations in running time, C…	Decision problems capable of being solved by a deterministic Turing machine while maintaining adherence to polynomial time belong to what class?	56e1c2eee3433e1400423138	597	complexity class P
92	But bounding the computation time above by some concrete function f(n) often yields complexity classes that depend on the chosen machine model. For instance, the language {xx | x is any binary string} can be solved in linear time on a multi-tape Turing machine, but necessarily requires quadratic time in the model of single-tape Turing machines. If we allow polynomial variations in running time, C…	Decision problems capable of being solved by a deterministic Turing machine while maintaining adherence to polynomial time belong to what class?	56e1c2eee3433e1400423138	614	P
93	Many important complexity classes can be defined by bounding the time or space used by the algorithm. Some important complexity classes of decision problems defined in this manner are the following:	What are two examples of measurements are bound within algorithms to establish complexity classes?	56e1c3e1e3433e1400423148	65	time or space
94	Many important complexity classes can be defined by bounding the time or space used by the algorithm. Some important complexity classes of decision problems defined in this manner are the following:	What function is used by algorithms to define measurements like time or space?	56e1c3e1e3433e1400423149	52	bounding
95	Many important complexity classes can be defined by bounding the time or space used by the algorithm. Some important complexity classes of decision problems defined in this manner are the following:	Bounding of time and space or similar measurements is often used by algorithms to define what?	56e1c3e1e3433e140042314a	15	complexity classes
96	Other important complexity classes include BPP, ZPP and RP, which are defined using probabilistic Turing machines; AC and NC, which are defined using Boolean circuits; and BQP and QMA, which are defined using quantum Turing machines. #P is an important complexity class of counting problems (not decision problems). Classes like IP and AM are defined using Interactive proof systems. ALL is the clas…	What are three examples of complexity classes associated with definitions established by probabilistic Turing machines?	56e1c4fce3433e140042314e	43	BPP, ZPP and RP
97	Other important complexity classes include BPP, ZPP and RP, which are defined using probabilistic Turing machines; AC and NC, which are defined using Boolean circuits; and BQP and QMA, which are defined using quantum Turing machines. #P is an important complexity class of counting problems (not decision problems). Classes like IP and AM are defined using Interactive proof systems. ALL is the clas…	AC and NC are complexity classes typically associated with what type of circuit?	56e1c4fce3433e140042314f	150	Boolean
98	Other important complexity classes include BPP, ZPP and RP, which are defined using probabilistic Turing machines; AC and NC, which are defined using Boolean circuits; and BQP and QMA, which are defined using quantum Turing machines. #P is an important complexity class of counting problems (not decision problems). Classes like IP and AM are defined using Interactive proof systems. ALL is the clas…	AC and NC are complexity classes typically associated with what type of circuit?	56e1c4fce3433e140042314f	150	Boolean circuits;
99	Other important complexity classes include BPP, ZPP and RP, which are defined using probabilistic Turing machines; AC and NC, which are defined using Boolean circuits; and BQP and QMA, which are defined using quantum Turing machines. #P is an important complexity class of counting problems (not decision problems). Classes like IP and AM are defined using Interactive proof systems. ALL is the clas…	BQP and QMA are examples of complexity classes most commonly associated with what type of Turing machine?	56e1c4fce3433e1400423150	209	quantum
100	Other important complexity classes include BPP, ZPP and RP, which are defined using probabilistic Turing machines; AC and NC, which are defined using Boolean circuits; and BQP and QMA, which are defined using quantum Turing machines. #P is an important complexity class of counting problems (not decision problems). Classes like IP and AM are defined using Interactive proof systems. ALL is the clas…	What is the expression used to represent a complexity class of counting problems?	56e1c4fce3433e1400423151	234	#P

## Sheet: SPARQL
1	boolean	false	true	false		en	Is Christian Bale starring in Velvet Goldmine?	Christian Bale, starring, Velvet Goldmine		PREFIX dbo: <http://dbpedia.org/ontology/> PREFIX res: <http://dbpedia.org/resource/> ASK WHERE { res:Velvet_Goldmine dbo:starring res:Christian_Bale . }
2	resource	false	true	false		en	List all games by GMT.	game, GMT		PREFIX dbo: <http://dbpedia.org/ontology/> PREFIX res: <http://dbpedia.org/resource/> SELECT DISTINCT ?uri WHERE { ?uri dbo:publisher res:GMT_Games . }
3	boolean	false	true	false		en	Does the Isar flow into a lake?	Isar, flow, lake		PREFIX dbo: <http://dbpedia.org/ontology/> PREFIX res: <http://dbpedia.org/resource/> PREFIX rdf: <http://www.w3.org/1999/02/22-rdf-syntax-ns#> ASK WHERE { ?x dbo:inflow res:Isar . ?x rdf:type dbo:Lake . }
4	resource	false	true	false		en	Which airports does Yeti Airlines serve?	airports, Yeti Airlines		SELECT DISTINCT ?uri WHERE { <http://dbpedia.org/resource/Yeti_Airlines> <http://dbpedia.org/ontology/targetAirport> ?uri . }
5	resource	true	true	false		en	Which Indian company has the most employees?	Indian company, the most employees		SELECT DISTINCT ?uri WHERE { ?uri a <http://dbpedia.org/ontology/Company> . ?uri <http://dbpedia.org/ontology/location> <http://dbpedia.org/resource/India> . ?uri <http://dbpedia.org/ontology/numberOfEmployees> ?n . } ORDER BY DESC(?n) OFFSET 0 LIMIT 1
6	resource	false	true	false		en	What color expresses loyalty?	color, express, loyalty		SELECT DISTINCT ?uri WHERE { ?uri <http://dbpedia.org/ontology/connotation> <http://dbpedia.org/resource/Loyalty> . }
7	resource	true	true	false		en	Which city has the most inhabitants?	city, the most inhabitants		PREFIX dbo: <http://dbpedia.org/ontology/> PREFIX res: <http://dbpedia.org/resource/> PREFIX rdf: <http://www.w3.org/1999/02/22-rdf-syntax-ns#> SELECT DISTINCT ?uri WHERE { ?uri rdf:type dbo:City . ?uri dbo:populationTotal ?pop . } ORDER BY DESC(?pop) OFFSET 0 LIMIT 1
8	resource	false	true	false		en	Who created Wikipedia?	Wikipedia, created		PREFIX dbo: <http://dbpedia.org/ontology/> PREFIX res: <http://dbpedia.org/resource/> SELECT DISTINCT ?uri WHERE { res:Wikipedia dbo:author ?uri . }
9	boolean	false	true	false		en	Is Rita Wilson the wife of Tom Hanks?	Rita Wilson, wife, Tom Hanks		PREFIX dbo: <http://dbpedia.org/ontology/> PREFIX res: <http://dbpedia.org/resource/> ASK WHERE { res:Tom_Hanks dbo:spouse res:Rita_Wilson . }
10	boolean	false	true	false		en	Is the wife of president Obama called Michelle?	Obama, president, wife, called, Michelle		PREFIX dbo: <http://dbpedia.org/ontology/> PREFIX res: <http://dbpedia.org/resource/> PREFIX rdfs: <http://www.w3.org/2000/01/rdf-schema#> ASK WHERE { res:Barack_Obama dbo:spouse ?spouse . ?spouse rdfs:label ?name . FILTER(regex(?name,'Michelle')) }
11	number	true	true	false		en	How many ethnic groups live in Slovenia?	how many, ethnic groups, Slovenia		SELECT (COUNT(DISTINCT ?uri) as ?c) WHERE { <http://dbpedia.org/resource/Slovenia> <http://dbpedia.org/ontology/ethnicGroup> ?uri . }
12	resource	false	true	false		en	Who is the president of Eritrea?	president, Eritrea		SELECT DISTINCT ?uri WHERE { <http://dbpedia.org/resource/Eritrea> <http://dbpedia.org/ontology/leader> ?uri . <http://dbpedia.org/resource/Eritrea> <http://dbpedia.org/ontology/leaderTitle> 'President'@en . }
13	resource	false	true	false		en	Which films did Stanley Kubrick direct?	film, Stanley Kubrick, direct		SELECT DISTINCT ?uri WHERE { ?uri <http://dbpedia.org/ontology/director> <http://dbpedia.org/resource/Stanley_Kubrick> . }
14	date	false	true	false		en	When was the Titanic completed?	Titanic, completion date		PREFIX dbo: <http://dbpedia.org/ontology/> PREFIX res: <http://dbpedia.org/resource/> SELECT DISTINCT ?date WHERE { res:RMS_Titanic dbo:completionDate ?date . }
15	resource	false	true	false		en	How many pages does War and Peace have?	how many, pages, War and Peace		PREFIX dbo: <http://dbpedia.org/ontology/> PREFIX res: <http://dbpedia.org/resource/> SELECT DISTINCT ?n WHERE { res:War_and_Peace dbo:numberOfPages ?n . }
16	resource	true	true	false		en	Who is the youngest player in the Premier League?	player, Premier League, youngest		PREFIX dbo: <http://dbpedia.org/ontology/> PREFIX res: <http://dbpedia.org/resource/> SELECT DISTINCT ?uri WHERE { ?uri dbo:team ?x . ?x dbo:league res:Premier_League . ?uri dbo:birthDate ?y . } ORDER BY DESC(?y) OFFSET 0 LIMIT 1
17	resource	false	true	false		en	What is the highest mountain in Italy?	highest, mountain, Italy		PREFIX dbo: <http://dbpedia.org/ontology/> PREFIX res: <http://dbpedia.org/resource/> PREFIX rdf: <http://www.w3.org/1999/02/22-rdf-syntax-ns#> SELECT DISTINCT ?uri WHERE { ?uri rdf:type dbo:Mountain . ?uri dbo:locatedInArea res:Italy . ?uri dbo:elevation ?num . } ORDER BY DESC(?num) OFFSET 0 LIMIT 1
18	number	false	true	false		en	How tall is Claudia Schiffer?	Claudia Schiffer, tall		PREFIX res: <http://dbpedia.org/resource/> PREFIX dbo: <http://dbpedia.org/ontology/> SELECT DISTINCT ?height WHERE { res:Claudia_Schiffer dbo:height ?height . }
19	resource	false	true	false		en	Who was John F. Kennedy's vice president?	John F. Kennedy, vice president		PREFIX dbo: <http://dbpedia.org/ontology/> PREFIX res: <http://dbpedia.org/resource/> SELECT DISTINCT ?uri WHERE { res:John_F._Kennedy dbo:vicePresident ?uri . }
20	resource	false	true	false		en	Which subsidiary of Lufthansa serves both Dortmund and Berlin Tegel?	subsidiary, Lufthansa, serve, Dortmund, Berlin Tegel		PREFIX res: <http://dbpedia.org/resource/> PREFIX dbo: <http://dbpedia.org/ontology/> SELECT DISTINCT ?uri WHERE { res:Lufthansa dbo:subsidiary ?uri . ?uri dbo:targetAirport res:Dortmund_Airport . ?uri dbo:targetAirport res:Berlin_Tegel_Airport . }
21	resource	false	true	false		en	Who was the successor of John F. Kennedy?	John F. Kennedy, successor		PREFIX dbo: <http://dbpedia.org/ontology/> PREFIX res: <http://dbpedia.org/resource/> SELECT DISTINCT ?uri WHERE { res:John_F._Kennedy dbo:successor ?uri . }
22	resource	false	true	false		en	Who composed the soundtrack for Cameron's Titanic?	compose, soundtrack, Cameron's Titanic		SELECT DISTINCT ?uri WHERE { <http://dbpedia.org/resource/Titanic_(1997_film)> <http://dbpedia.org/ontology/musicComposer> ?uri . }
23	resource	true	true	false		en	Which movies did Kurosawa direct?	film, direct, Kurosawa		PREFIX dbo: <http://dbpedia.org/ontology/> PREFIX res: <http://dbpedia.org/resource/> PREFIX rdf: <http://www.w3.org/1999/02/22-rdf-syntax-ns#> SELECT DISTINCT ?uri WHERE { ?uri rdf:type dbo:Film . ?uri dbo:director res:Akira_Kurosawa . }
24	resource	true	true	false		en	For which label did Elvis record his first album?	Elvis, first, album, label		PREFIX dbo: <http://dbpedia.org/ontology/> PREFIX res: <http://dbpedia.org/resource/> PREFIX rdf: <http://www.w3.org/1999/02/22-rdf-syntax-ns#> SELECT DISTINCT ?uri WHERE { ?x rdf:type dbo:Album . ?x dbo:artist res:Elvis_Presley . ?x dbo:releaseDate ?y . ?x dbo:recordLabel ?uri . } ORDER BY ASC(?y) OFFSET 0 LIMIT 1
25	resource	false	true	false		en	In which time zone is Rome?	time zone, Rome		SELECT DISTINCT ?uri WHERE { <http://dbpedia.org/resource/Rome> <http://dbpedia.org/ontology/timeZone> ?uri . }
26	resource	false	true	false		en	Give me the currency of China.	currency, China		PREFIX res: <http://dbpedia.org/resource/> PREFIX dbo: <http://dbpedia.org/ontology/> SELECT DISTINCT ?uri WHERE { res:China dbo:currency ?uri . }
27	resource	false	true	false		en	Who are the developers of DBpedia?	developers, DBpedia		SELECT DISTINCT ?uri WHERE { <http://dbpedia.org/resource/DBpedia> <http://dbpedia.org/ontology/developer> ?uri . }
28	boolean	false	true	false		en	Does Abraham Lincoln's death place have a website?	Abraham Lincoln, death place, website		PREFIX dbo: <http://dbpedia.org/ontology/> PREFIX res: <http://dbpedia.org/resource/> ASK WHERE { res:Abraham_Lincoln dbo:deathPlace ?p . ?p dbo:website ?w . }
29	resource	false	true	false		en	Who is the king of the Netherlands?	king, the Netherlands		SELECT DISTINCT ?uri WHERE { <http://dbpedia.org/resource/Netherlands> <http://dbpedia.org/ontology/leader> ?uri . ?uri a <http://dbpedia.org/ontology/Royalty> . }
30	resource	false	true	false		en	In which city did Nikos Kazantzakis die?	city, Nikos Kazantzakis, die		SELECT DISTINCT ?uri WHERE { <http://dbpedia.org/resource/Nikos_Kazantzakis> <http://dbpedia.org/ontology/deathPlace> ?uri . ?uri a <http://dbpedia.org/ontology/Town> . }
31	resource	false	false	false		en	Who was the father of Queen Elizabeth II?	father, Queen Elizabeth II		PREFIX res: <http://dbpedia.org/resource/> PREFIX dbp: <http://dbpedia.org/property/> SELECT DISTINCT ?uri WHERE { res:Elizabeth_II dbp:father ?uri . }
32	resource	false	true	false		en	Give me a list of all critically endangered birds.	list, critically endangered birds		SELECT DISTINCT ?uri ?p WHERE { ?uri a <http://dbpedia.org/ontology/Bird> . { ?uri <http://dbpedia.org/ontology/conservationStatus> 'CR'^^<http://www.w3.org/2001/XMLSchema#string> . } UNION { ?uri <http://purl.org/dc/terms/subject> <http://dbpedia.org/resource/Category:Critically_endangered_animals> . } }
33	number	false	true	false		en	How many inhabitants does the largest city in Canada have?	inhabitants, largest city, Canada		PREFIX dbo: <http://dbpedia.org/ontology/> PREFIX res: <http://dbpedia.org/resource/> SELECT DISTINCT ?num WHERE { res:Canada dbo:largestCity ?city . ?city dbo:populationTotal ?num . }
34	resource	false	true	false		en	In which military conflicts did Lawrence of Arabia participate?	Lawrence of Arabia, military conflict		PREFIX dbo: <http://dbpedia.org/ontology/> PREFIX res: <http://dbpedia.org/resource/> SELECT DISTINCT ?uri WHERE { res:T._E._Lawrence dbo:battle ?uri . }
35	resource	true	true	false		en	Which book has the most pages?	book, the most pages		PREFIX dbo: <http://dbpedia.org/ontology/> PREFIX rdf: <http://www.w3.org/1999/02/22-rdf-syntax-ns#> SELECT DISTINCT ?uri WHERE { ?uri rdf:type dbo:Book . ?uri dbo:numberOfPages ?n . } ORDER BY DESC(?n) OFFSET 0 LIMIT 1
36	resource	false	true	false		en	In which country does the Nile start?	Nile, start, country		PREFIX dbo: <http://dbpedia.org/ontology/> PREFIX res: <http://dbpedia.org/resource/> SELECT DISTINCT ?uri WHERE { res:Nile dbo:sourceCountry ?uri . }
37	resource	true	true	false		en	Who is the Formula 1 race driver with the most races?	Formula 1, race driver, races, most		SELECT DISTINCT ?uri WHERE { ?uri <http://www.w3.org/1999/02/22-rdf-syntax-ns#type> <http://dbpedia.org/ontology/FormulaOneRacer> . ?uri <http://dbpedia.org/ontology/races> ?x . } ORDER BY DESC(?x) OFFSET 0 LIMIT 1
38	resource	false	true	false		en	Which companies produce hovercrafts?	companies, produce, hovercrafts		SELECT DISTINCT ?uri WHERE { ?uri a <http://dbpedia.org/ontology/Company> . ?uri <http://dbpedia.org/ontology/product> <http://dbpedia.org/resource/Hovercraft> . }
39	boolean	false	true	false		en	Did Elvis Presley have children?	Elvis Presley, children		ASK WHERE { <http://dbpedia.org/resource/Elvis_Presley> <http://dbpedia.org/ontology/child> ?uri . }
40	resource	false	true	false		en	In which city was the president of Montenegro born?	city, born, president of Montenegro		SELECT DISTINCT ?uri WHERE { ?x <http://dbpedia.org/property/office> <http://dbpedia.org/resource/President_of_Montenegro> . ?x <http://dbpedia.org/ontology/birthPlace> ?uri . ?uri a <http://dbpedia.org/ontology/City> . }
41	resource	false	true	false		en	Which country was Bill Gates born in?	country, born, Bill Gates		SELECT DISTINCT ?uri WHERE { <http://dbpedia.org/resource/Bill_Gates> <http://dbpedia.org/ontology/birthPlace> ?x . ?x <http://dbpedia.org/ontology/country> ?uri . }
42	resource	false	true	false		en	In which countries do people speak Japanese?	which countries, speak, Japanese		SELECT DISTINCT ?uri WHERE { ?uri a <http://dbpedia.org/ontology/Country> . ?uri <http://dbpedia.org/ontology/language> <http://dbpedia.org/resource/Japanese_language> . }
43	resource	false	true	false		en	Show me the book that Muhammad Ali wrote.	book, wrote, Muhammad Ali		PREFIX dbo: <http://dbpedia.org/ontology/> PREFIX res: <http://dbpedia.org/resource/> PREFIX rdf: <http://www.w3.org/1999/02/22-rdf-syntax-ns#> SELECT DISTINCT ?uri WHERE { ?uri rdf:type dbo:Book . ?uri dbo:author res:Muhammad_Ali . }
44	boolean	false	true	false		en	Is Michelle Obama the wife of Barack Obama?	Michelle Obama, wife, Barack Obama		PREFIX dbo: <http://dbpedia.org/ontology/> PREFIX res: <http://dbpedia.org/resource/> ASK WHERE { res:Barack_Obama dbo:spouse res:Michelle_Obama . }
45	number	false	true	false		en	What is the area code of Berlin?	Berlin, area code		PREFIX dbo: <http://dbpedia.org/ontology/> PREFIX res: <http://dbpedia.org/resource/> SELECT DISTINCT ?string WHERE { res:Berlin dbo:areaCode ?string . }
46	resource	false	true	false		en	Give me all actors starring in Last Action Hero.	actor, starring, Last Action Hero		PREFIX dbo: <http://dbpedia.org/ontology/> PREFIX res: <http://dbpedia.org/resource/> SELECT DISTINCT ?uri WHERE { res:Last_Action_Hero dbo:starring ?uri . }
47	string	false	true	false		en	What are the nicknames of San Francisco?	San Francisco, nickname		SELECT DISTINCT ?string WHERE { <http://dbpedia.org/resource/San_Francisco> <http://dbpedia.org/property/nickname> ?string . }
48	resource	true	true	false		en	What was the first Queen album?	first album, Queen		SELECT DISTINCT ?uri WHERE { ?uri a <http://dbpedia.org/ontology/Album> . ?uri <http://dbpedia.org/ontology/artist> <http://dbpedia.org/resource/Queen_(band)> . ?uri <http://dbpedia.org/ontology/releaseDate> ?d . } ORDER BY ASC(?d) OFFSET 0 LIMIT 1
49	resource	false	false	false		en	Through which countries does the Yenisei river flow?	Yenisei river, flow through, country		PREFIX res: <http://dbpedia.org/resource/> PREFIX dbp: <http://dbpedia.org/property/> SELECT DISTINCT ?uri WHERE { res:Yenisei_River dbp:country ?uri . }
50	resource	false	true	false		en	Which television shows were created by Walt Disney?	television show, create, Walt Disney		PREFIX dbo: <http://dbpedia.org/ontology/> PREFIX res: <http://dbpedia.org/resource/> PREFIX rdf: <http://www.w3.org/1999/02/22-rdf-syntax-ns#> SELECT DISTINCT ?uri WHERE { ?uri rdf:type dbo:TelevisionShow . ?uri dbo:creator res:Walt_Disney . }
51	resource	true	true	false		en	What is the bridge with the longest span?	bridge, longest span		PREFIX dbo: <http://dbpedia.org/ontology/> PREFIX res: <http://dbpedia.org/resource/> PREFIX rdf: <http://www.w3.org/1999/02/22-rdf-syntax-ns#> SELECT DISTINCT ?uri WHERE { ?uri rdf:type dbo:Bridge . ?uri dbo:mainspan ?s . } ORDER BY DESC(?s) OFFSET 0 LIMIT 1
52	resource	false	true	false		en	What country is Sitecore from?	country, Sitecore		SELECT DISTINCT ?uri WHERE { <http://dbpedia.org/resource/Sitecore> <http://dbpedia.org/ontology/foundationPlace> ?uri . }
53	resource	false	true	false		en	Whom did Lance Bass marry?	wife, Lance Bass		SELECT DISTINCT ?uri WHERE { ?uri <http://dbpedia.org/ontology/spouse> <http://dbpedia.org/resource/Lance_Bass> . }
54	resource	false	true	false		en	What is the capital of Canada?	capital, Canada		PREFIX dbo: <http://dbpedia.org/ontology/> PREFIX res: <http://dbpedia.org/resource/> SELECT DISTINCT ?uri WHERE { res:Canada dbo:capital ?uri . }
55	resource	false	true	false		en	Who was Vincent van Gogh inspired by?	person, inspiring, Vincent van Gogh		SELECT DISTINCT ?uri WHERE { ?uri <http://dbpedia.org/ontology/influenced> <http://dbpedia.org/resource/Vincent_van_Gogh> . }
56	resource	false	true	false		en	In which city did John F. Kennedy die?	city, John F. Kennedy, die		PREFIX dbo: <http://dbpedia.org/ontology/> PREFIX res: <http://dbpedia.org/resource/> PREFIX rdf: <http://www.w3.org/1999/02/22-rdf-syntax-ns#> SELECT DISTINCT ?uri WHERE { res:John_F._Kennedy dbo:deathPlace ?uri . ?uri rdf:type dbo:City . }
57	boolean	false	true	false		en	Was U.S. president Jackson involved in a war?	U.S. president, Jackson, war		PREFIX dbo: <http://dbpedia.org/ontology/> PREFIX res: <http://dbpedia.org/resource/> ASK WHERE { res:Andrew_Jackson dbo:battle ?battle . }
58	resource	false	true	false		en	Who wrote the Game of Thrones theme?	writer, Game of Thrones		SELECT DISTINCT ?uri WHERE { <http://dbpedia.org/resource/Game_of_Thrones> <http://dbpedia.org/ontology/composer> ?uri. }
59	resource	false	true	false		en	Who designed the Brooklyn Bridge?	Brooklyn Bridge, design		PREFIX res: <http://dbpedia.org/resource/> PREFIX dbo: <http://dbpedia.org/ontology/> SELECT DISTINCT ?uri WHERE { res:Brooklyn_Bridge dbo:architect ?uri . }
60	date	false	true	false		en	When did Boris Becker end his active career?	Boris Becker, end career		SELECT DISTINCT ?d WHERE { <http://dbpedia.org/resource/Boris_Becker> <http://dbpedia.org/ontology/activeYearsEndDate> ?d . }
61	resource	false	true	false		en	Which types of grapes grow in Oregon?	grape types, grow, Oregon		SELECT DISTINCT ?uri WHERE { <http://dbpedia.org/resource/Oregon_wine> <http://dbpedia.org/ontology/growingGrape> ?uri . }
62	number	false	true	false		en	How tall is Michael Jordan?	tall, Michael Jordan		PREFIX dbo: <http://dbpedia.org/ontology/> PREFIX res: <http://dbpedia.org/resource/> SELECT DISTINCT ?num WHERE { res:Michael_Jordan dbo:height ?num . }
63	resource	false	true	false		en	To which party does the mayor of Paris belong?	party, mayor, Paris, belong		SELECT DISTINCT ?uri WHERE { <http://dbpedia.org/resource/Paris> <http://dbpedia.org/ontology/mayor> ?x . ?x <http://dbpedia.org/ontology/party> ?uri . }
64	resource	false	true	false		en	Who wrote the book The Pillars of the Earth?	wrote, book, The pillars of the Earth		PREFIX dbo: <http://dbpedia.org/ontology/> PREFIX res: <http://dbpedia.org/resource/> SELECT DISTINCT ?uri WHERE { res:The_Pillars_of_the_Earth dbo:author ?uri . }
65	resource	false	true	false		en	Who was the 16th president of the United States?	United States, 16th president		PREFIX dbo: <http://dbpedia.org/ontology/> PREFIX rdf: <http://www.w3.org/1999/02/22-rdf-syntax-ns#> SELECT DISTINCT ?uri WHERE { ?uri dbo:office 'President of the United States' . ?uri dbo:orderInOffice '16th' . }
66	number	false	true	false		en	How high is the Mount Everest?	Mount Everest, high		PREFIX dbo: <http://dbpedia.org/ontology/> PREFIX res: <http://dbpedia.org/resource/> SELECT DISTINCT ?num WHERE { res:Mount_Everest dbo:elevation ?num. }
67	resource	false	true	false		en	Who was the doctoral supervisor of Albert Einstein?	doctoral supervisor, Albert Einstein		SELECT DISTINCT ?uri WHERE { <http://dbpedia.org/resource/Albert_Einstein> <http://dbpedia.org/ontology/doctoralAdvisor> ?uri . }
68	resource	false	true	false		en	In which city does Sylvester Stallone live?	city, live, Sylvester Stallone		SELECT DISTINCT ?uri WHERE { ?uri a <http://dbpedia.org/ontology/City> . <http://dbpedia.org/resource/Sylvester_Stallone> <http://dbpedia.org/ontology/residence> ?uri . }
69	resource	false	true	false		en	What is the currency of the Czech Republic?	Czech republic, currency		PREFIX dbo: <http://dbpedia.org/ontology/> PREFIX res: <http://dbpedia.org/resource/> SELECT DISTINCT ?uri WHERE { res:Czech_Republic dbo:currency ?uri . }
70	boolean	false	true	false		en	Did Socrates influence Aristotle?	Socrates, influence, Aristotle		PREFIX dbo: <http://dbpedia.org/ontology/> PREFIX res: <http://dbpedia.org/resource/> ASK WHERE { res:Aristotle dbo:influencedBy res:Socrates . }
71	resource	false	false	false		en	What is the time zone of Salt Lake City?	Salt Lake City, time zone		PREFIX res: <http://dbpedia.org/resource/> PREFIX dbp: <http://dbpedia.org/property/> SELECT DISTINCT ?uri WHERE { res:Salt_Lake_City dbp:timezone ?uri . }
72	resource	false	true	false		en	Who is the son of Sonny and Cher?	son, Sonny and Cher		SELECT DISTINCT ?uri WHERE { ?uri <http://dbpedia.org/ontology/parent> <http://dbpedia.org/resource/Cher> . ?uri <http://dbpedia.org/ontology/parent> <http://dbpedia.org/resource/Sonny_Bono> . }
73	resource	false	true	false		en	In which city are the headquarters of the United Nations?	city, headquarters of the United Nations		SELECT DISTINCT ?uri WHERE { <http://dbpedia.org/resource/Headquarters_of_the_United_Nations> <http://dbpedia.org/ontology/location> ?uri . ?uri a <http://dbpedia.org/ontology/City> . }
74	resource	false	true	false		en	Who is the founder of Penguin Books?	founder, Penguin Books		PREFIX dbo: <http://dbpedia.org/ontology/> PREFIX res: <http://dbpedia.org/resource/> PREFIX rdf: <http://www.w3.org/1999/02/22-rdf-syntax-ns#> SELECT DISTINCT ?uri WHERE { res:Penguin_Books dbo:founder ?uri . }
75	date	false	true	false		en	When was Jack Wolfskin founded?	Jack Wolfskin, founded		SELECT DISTINCT ?year WHERE { <http://dbpedia.org/resource/Jack_Wolfskin> <http://dbpedia.org/ontology/foundingYear> ?year . }
76	resource	false	true	false		en	Who is the mayor of Rotterdam?	mayor, Rotterdam		PREFIX dbo: <http://dbpedia.org/ontology/> PREFIX res: <http://dbpedia.org/resource/> SELECT DISTINCT ?uri WHERE { res:Rotterdam dbo:leaderName ?uri . }
77	resource	false	true	false		en	Give me all Swedish oceanographers.	Swedish, oceanographer		PREFIX dbo: <http://dbpedia.org/ontology/> PREFIX res: <http://dbpedia.org/resource/> SELECT DISTINCT ?uri WHERE { ?uri dbo:field res:Oceanography . ?uri dbo:birthPlace res:Sweden . }
78	resource	false	true	false		en	Show me Hemingway's autobiography.	autobiography, Hemingway		SELECT DISTINCT ?uri WHERE { ?uri <http://dbpedia.org/ontology/author> <http://dbpedia.org/resource/Ernest_Hemingway> . ?uri <http://dbpedia.org/ontology/literaryGenre> <http://dbpedia.org/resource/Autobiography> . }
79	resource	false	true	false		en	Who are the parents of the wife of Juan Carlos I?	Juan Carlos I, wife, parents		PREFIX dbo: <http://dbpedia.org/ontology/> PREFIX res: <http://dbpedia.org/resource/> SELECT DISTINCT ?uri WHERE { res:Juan_Carlos_I_of_Spain dbo:spouse ?x . ?x dbo:parent ?uri . }
80	boolean	false	true	false		en	Did Tesla win a nobel prize in physics?	Tesla, nobel prize, physics		PREFIX dbo: <http://dbpedia.org/ontology/> PREFIX res: <http://dbpedia.org/resource/> ASK WHERE { res:Nikola_Tesla dbo:award res:Nobel_Prize_in_Physics . }
81	resource	true	true	false		en	Who is the tallest basketball player?	tallest, basketball player		SELECT DISTINCT ?uri WHERE { ?uri <http://www.w3.org/1999/02/22-rdf-syntax-ns#type> <http://dbpedia.org/ontology/BasketballPlayer> . ?uri <http://dbpedia.org/ontology/height> ?num . } ORDER BY DESC(?num) OFFSET 0 LIMIT 1
82	resource	true	true	false		en	Which city has the least inhabitants?	city, the least inhabitants		SELECT DISTINCT ?uri WHERE { ?uri <http://www.w3.org/1999/02/22-rdf-syntax-ns#type> <http://dbpedia.org/ontology/City> . ?uri <http://dbpedia.org/ontology/populationTotal> ?pop . } ORDER BY ASC(?pop) OFFSET 0 LIMIT 1
83	boolean	false	true	false		en	Is proinsulin a protein?	proinsulin, protein		PREFIX dbo: <http://dbpedia.org/ontology/> PREFIX res: <http://dbpedia.org/resource/> PREFIX rdf: <http://www.w3.org/1999/02/22-rdf-syntax-ns#> ASK WHERE { res:Proinsulin rdf:type dbo:Protein . }
84	resource	false	true	false		en	Who were the parents of Queen Victoria?	parents, Queen Victoria		PREFIX dbo: <http://dbpedia.org/ontology/> PREFIX res: <http://dbpedia.org/resource/> SELECT DISTINCT ?uri WHERE { res:Queen_Victoria dbo:parent ?uri . }
85	boolean	false	true	false		en	Did Che Guevara have children?	children, Che Guevara		PREFIX dbo: <http://dbpedia.org/ontology/> PREFIX res: <http://dbpedia.org/resource/> ASK WHERE { res:Che_Guevara dbo:child ?uri . }
86	boolean	false	true	false		en	Is Lake Baikal bigger than the Great Bear Lake?	Lake Baikal, bigger than, Great Bear Lake		PREFIX res: <http://dbpedia.org/resource/> PREFIX dbo: <http://dbpedia.org/ontology/> ASK WHERE { res:Lake_Baikal dbo:areaTotal ?a1 . res:Great_Bear_Lake dbo:areaTotal ?a2 . FILTER (?a1 > ?a2) }
87	boolean	false	true	false		en	Did Kaurismäki ever win the Grand Prix at Cannes?	Kaurismäki, winner, Grand Prix at Cannes		ASK WHERE { <http://dbpedia.org/resource/Aki_Kaurismäki> <http://dbpedia.org/ontology/award> <http://dbpedia.org/resource/Grand_Prix_(Cannes_Film_Festival)> . }
88	resource	true	true	false		en	Give me all books by William Goldman with more than 300 pages.	book, William Goldman, pages, more than 300		PREFIX dbo: <http://dbpedia.org/ontology/> PREFIX res: <http://dbpedia.org/resource/> PREFIX rdf: <http://www.w3.org/1999/02/22-rdf-syntax-ns#> SELECT DISTINCT ?uri WHERE { ?uri rdf:type dbo:Book . ?uri dbo:author res:William_Goldman . ?uri dbo:numberOfPages ?x . FILTER (?x > 300) }
89	resource	false	true	false		en	Where is Fort Knox located?	Fort Knox, located		SELECT DISTINCT ?uri WHERE { <http://dbpedia.org/resource/Fort_Knox> <http://dbpedia.org/property/location> ?uri . }
90	resource	false	false	false		en	In which U.S. state is Fort Knox located?	Fort Knox, located, U.S. state		PREFIX dbo: <http://dbpedia.org/ontology/> PREFIX dbp: <http://dbpedia.org/property/> PREFIX res: <http://dbpedia.org/resource/> SELECT DISTINCT ?uri WHERE { res:Fort_Knox dbp:location ?uri . ?uri dbo:country res:United_States . }
91	resource	false	true	false		en	Where is Syngman Rhee buried?	where, Syngman Rhee, buried		SELECT DISTINCT ?uri WHERE { <http://dbpedia.org/resource/Syngman_Rhee> <http://dbpedia.org/ontology/restingPlace> ?uri . }
92	resource	false	true	false		en	What is the timezone in San Pedro de Atacama?	timezone, San Pedro de Atacama		SELECT DISTINCT ?uri WHERE { <http://dbpedia.org/resource/San_Pedro_de_Atacama> <http://dbpedia.org/ontology/timeZone> ?uri . }
93	resource	false	true	false		en	To which artistic movement did the painter of The Three Dancers belong?	artistic movement, painter, The Three Dancers		SELECT DISTINCT ?uri WHERE { <http://dbpedia.org/resource/The_Three_Dancers> <http://dbpedia.org/ontology/author> ?person . ?person <http://dbpedia.org/ontology/movement> ?uri . }
94	resource	false	true	false		en	Which scientist is known for the Manhattan Project and the Nobel Peace Prize?	scientist, known for, Manhattan Project, Nobel Peace Prize		PREFIX res: <http://dbpedia.org/resource/> PREFIX dbo: <http://dbpedia.org/ontology/> PREFIX rdf: <http://www.w3.org/1999/02/22-rdf-syntax-ns#> SELECT DISTINCT ?uri WHERE { ?uri dbo:knownFor res:Manhattan_Project . ?uri rdf:type dbo:Scientist . ?uri dbo:knownFor res:Nobel_Peace_Prize . }
95	resource	false	true	false		en	Show me all books in Asimov's Foundation series.	books, Asimov, Foundation series		SELECT DISTINCT ?uri WHERE { ?uri <http://dbpedia.org/ontology/series> <http://dbpedia.org/resource/Foundation_series> . }
96	resource	true	false	false		en	Give me all cities in New Jersey with more than 100000 inhabitants.	New Jersey, city, inhabitants, more than 100000		PREFIX dbo: <http://dbpedia.org/ontology/> PREFIX dbp: <http://dbpedia.org/property/> PREFIX res: <http://dbpedia.org/resource/> PREFIX rdf: <http://www.w3.org/1999/02/22-rdf-syntax-ns#> SELECT DISTINCT ?uri WHERE { ?uri rdf:type dbo:City . ?uri dbo:isPartOf res:New_Jersey . ?uri dbp:populationTotal ?inhabitants . FILTER (?inhabitants > 100000) . }
97	resource	true	true	false		en	Which museum in New York has the most visitors?	museum, New York, the most visitors		SELECT DISTINCT ?uri WHERE { ?uri <http://www.w3.org/1999/02/22-rdf-syntax-ns#type> <http://dbpedia.org/ontology/Museum> . ?uri <http://dbpedia.org/ontology/location> <http://dbpedia.org/resource/New_York_City> . ?uri <http://dbpedia.org/ontology/numberOfVisitors> ?num . } ORDER BY DESC(?num) OFFSET 0 LIMIT 1
98	number	false	true	false		en	How high is the Yokohama Marine Tower?	high, Yokohama Marine Tower		PREFIX dbo: <http://dbpedia.org/ontology/> PREFIX res: <http://dbpedia.org/resource/> SELECT DISTINCT ?num WHERE { res:Yokohama_Marine_Tower dbo:height ?num . }
99	boolean	true	true	false		en	Does the new Battlestar Galactica series have more episodes than the old one?	new BattleStar Galactica series, episodes, more, old Battle Star Galactica series		PREFIX dbo: <http://dbpedia.org/ontology/> PREFIX res: <http://dbpedia.org/resource/> ASK WHERE { <http://dbpedia.org/resource/Battlestar_Galactica_%281978_TV_series%29> dbo:numberOfEpisodes ?x . <http://dbpedia.org/resource/Battlestar_Galactica_%282004_TV_series%29> dbo:numberOfEpisodes ?y . FILTER (?y > ?x) }
100	resource	true	true	false		en	Who is the youngest Darts player?	Darts player, youngest		PREFIX dbo: <http://dbpedia.org/ontology/> PREFIX rdf: <http://www.w3.org/1999/02/22-rdf-syntax-ns#> SELECT DISTINCT ?uri WHERE { ?uri rdf:type dbo:DartsPlayer . ?uri dbo:birthDate ?date . } ORDER BY DESC(?date) OFFSET 0 LIMIT 1
