# Supplementary material for: FLMatchQA: a recursive neural network-based question answering with customized federated learning model
Source: PeerJ journal article supplement (doi:10.7717/peerj-cs.2092), 2024-06-28
Supplement: QALD_7_Dataset.zip [file QALD_7_Dataset.zip]

## Sheet: Sheet1
dataset	id	questions	id	answertype	aggregation	onlydbo	hybrid	question	language	string	keywords	query	sparql	answers	head	vars	results	bindings	date	type	value	uri	type	value	c	type	value	string	type	value	list	type	value	boolean
	qald-7-train-multilingual		0	date	false	true	false		en	When was the Battle of Gettysburg?	Battle of Gettysburg		PREFIX dbo: <http://dbpedia.org/ontology/> PREFIX res: <http://dbpedia.org/resource/> SELECT DISTINCT ?date WHERE { res:Battle_of_Gettysburg dbo:date ?date . }			date				literal	1863-07-03
									pt_BR	Quando foi a batalha de Gettysburg?	batalha de Gettysburg
									de	Wann fand die Schlacht von Gettysburg statt?	Schlacht von Gettysburg
									es	¿Cuándo tuvo lugar la batalla de Gettysburg?	batalla de Gettysburg
									it	Quando ha avuto luogo la battaglia di Gettysburg?	battaglia di Gettysburg
									fr	Quand se déroula la bataille de Gettysburg?	bataille de Gettysburg, quand
									nl	Wanneer was de Slag bij Gettysburg?	Slag bij Gettysburg
									hi_IN	गेटिसबर्ग का युद्ध कब हुआ था?	गेटिसबर्ग का युद्ध
			1	resource	false	true	false		en	List all the musicals with music by Elton John.	musicals, music by, Elton John		PREFIX dbo: <http://dbpedia.org/ontology/> PREFIX res: <http://dbpedia.org/resource/> PREFIX rdf: <http://www.w3.org/1999/02/22-rdf-syntax-ns#> SELECT DISTINCT ?uri WHERE { ?uri rdf:type dbo:Musical . ?uri dbo:musicBy res:Elton_John . }			uri							uri	http://dbpedia.org/resource/The_Lion_King_(musical)
									pt_BR	Liste todos os musicais com músicas de Elton John.	musicais, música de, Elton John												uri	http://dbpedia.org/resource/Lestat_(musical)
									de	Liste alle Musicals mit Musik von Elton John auf.	Musicals, Musik von, Elton John												uri	http://dbpedia.org/resource/Billy_Elliot_the_Musical
									es	Dame todos los musicales con música de Elton John.	musicales, música, Elton John												uri	http://dbpedia.org/resource/Aida_(musical)
									it	Elenca tutti i musicals con musiche di Elton John.	musicals, musiche, Elton John
									fr	Donne-moi tous les musicals avec de la musique de de Elton John.	musicals, musique, Elton John
									nl	Toen een lijst van alle musicals met muziek van Elton John.	musicals, muziek van, Elton John
									hi_IN	एल्टन जॉन द्वारा संगीत के साथ सभी संगीतों को सूचीबद्ध करें।	एल्टन जॉन का संगीत
									ro	Listează toate muzicalurile cu muzică de Elton John.	muzicaluri, muzică de Elton John
			2	number	false	true	false		en	How high is the lighthouse in Colombo?	high, lighthouse in Colombo		SELECT DISTINCT ?num WHERE { <http://dbpedia.org/resource/Colombo_Lighthouse> <http://dbpedia.org/ontology/height> ?num . }			c										literal	29.0
									pt_BR	Qual a altura do Farol em Colombo?	altura, Farol em Colombo
									fa	فانوس دریایی کولومبو چقدر بلند است؟	فانوس دریایی کولومبو، بلند
									de	Wie hoch ist der Leuchtturm in Colombo?	hoch, Leuchtturm in Colombo
									es	¿Cómo de alta el faro de Colombo?	alta, Faro de Colombo?
									it	Quanto è alto il faro di Colombo?	altezza, faro di Colombo
									fr	Quelle est la hauteur du phare de Colombo?	hauteur, Phare de Colombo
									nl	Hoe hoog is de vuurtoren van Colombo?	hoog, vuurtoren van Colombo
									hi_IN	कोलंबो में लाइटहाउस कितना ऊँचा है?	कोलंबो, लाइटहाउस
									ro	Cât de înalt este farul din Colombo?	înalt, farul din Colombo
			3	resource	false	true	false		en	Who was the wife of U.S. president Lincoln?	U.S. president, Lincoln, wife		PREFIX dbo: <http://dbpedia.org/ontology/> PREFIX res: <http://dbpedia.org/resource/> SELECT DISTINCT ?uri WHERE { res:Abraham_Lincoln dbo:spouse ?uri. }			uri							uri	http://dbpedia.org/resource/Mary_Todd_Lincoln
									pt_BR	Quem foi a esposa do presidente americano Lincoln?	presidente americano, Lincoln, mulher
									de	Wer war die Frau von US-Präsident Lincoln?	US-Präsident, Lincoln, Frau
									es	¿Quién fué la mujer del presidente americano Lincoln?	presidente Americano, Lincoln, mujer
									it	Chi era la moglie del presidente degli Stati Uniti Lincoln?	presidente degli Stati Uniti, Lincoln, moglie
									fr	Qui était l'épouse du président américain Lincoln?	épouse, président américain Lincoln
									nl	Wie was de vrouw van de Amerikaanse president Lincoln?	vrouw, president van America, Lincoln
									hi_IN	अमेरिकी राष्ट्रपति लिंकन की पत्नी कौन थी?	अमेरिकी राष्ट्रपति लिंकन
			4	resource	false	true	false		en	Who is the host of the BBC Wildlife Specials?	host, BBC Wildlife Specials		SELECT DISTINCT ?uri WHERE { <http://dbpedia.org/resource/BBC_Wildlife_Specials> <http://dbpedia.org/ontology/presenter> ?uri . }			uri							uri	http://dbpedia.org/resource/David_Attenborough
									pt_BR	Quem é o apresentador do BBC Wildlife Specials?	apresentador, BBC Wildlife Specials
									fa	مجری مجموعه حیات وحش بی.بی.سی چه کسی است؟	مجری، مجموعه حیات وحش بی.بی.سی
									de	Wer moderiert die BBC Wildlife Specials?	BBC Wildlife Specials, Moderator
									es	¿Quién es el anfitrión de los especiales de la BBC Wildlife?	anfitrión, BBC Wildlife
									it	Chi è il presentatore degli speciali della BBC Wildlife?	presentatore, speciali, BBC Wildlife
									fr	Qui est le présentateur de BBC Wildlife Specials?	présentateur, BBC Wildlife Specials?
									nl	Wie is de presentator van de BBC Wildlife Specials?	presentator, BBC Wildlife Specials
									hi_IN	बीबीसी वाइल्डलाइफ स्पेशल का मेजबान कौन है?	बीबीसी वाइल्डलाइफ स्पेशल, मेजबान
									ro	Cine este prezentatorul pentru BBC Wildlife Specials?	prezentator, BBC Wildlife Specials
			5	number	false	true	false		en	How much did Pulp Fiction cost?	cost, Pulp Fiction		SELECT DISTINCT ?n WHERE { <http://dbpedia.org/resource/Pulp_Fiction> <http://dbpedia.org/ontology/budget> ?n . }			c										literal	8.0
									pt_BR	Quanto custou Pulp Fiction?	cost, Pulp Fiction
									fa	پالپ فیکشن چقدر هزینه داشت؟	پالپ فیکشن، هزینه
									de	Wieviel hat Pulp Fiction gekostet?	Kosten, Pulp Fiction
									es	¿Cuanto costo Pulp Fiction?	costo, Pulp Fiction
									it	Quanto è costato Pulp Fiction?	costo, Pulp Fiction
									fr	Combien a coûté Pulp Fiction?	prix, Pulp Fiction
									nl	Howeveel koste Pulp Fiction?	kosten, Pulp Fiction
									hi_IN	पल्प फिक्शन की लागत कितनी थी?	पल्प फिक्शन, लागत
									ro	Cât a costat Pulp Fiction?	cost, Pulp Fiction
			6	resource	false	true	false		en	In what city is the Heineken brewery?	city, Heineken brewery		SELECT DISTINCT ?uri WHERE { <http://dbpedia.org/resource/Heineken> <http://dbpedia.org/ontology/manufacturer> ?x . ?x <http://dbpedia.org/ontology/locationCity> ?uri . }			uri							uri	http://dbpedia.org/resource/Amsterdam
									pt_BR	Em que cidade fica a cervejaria Heineken?	cidade, cervejaria Heineken
									fa	آبجوسازی هینکن در کدام شهر قرار دارد؟	آبجوسازی هینکن، شهر
									de	In welcher Stadt ist die Heinekenbrauerei?	Stadt, Heinekenbrauerei
									es	¿En qué ciudad esta la fábrica de cerveza Heineken?	ciudad, fábrica cerveza Heineken
									it	In quale città si trova il birrificio della Heiniken?	città, birrificio della Heiniken
									fr	Dans quelle ville se trouve la brasserie de Heineken?	ville, brasserie, Heineken?
									nl	In welke stad bevindt zich de Heineken brouwerij?	stad, Heineken, brouwerij
									hi_IN	हाइनेकेन शराब की भठ्ठी किस शहर में है?	हाइनेकेन, शराब की भठ्ठ, शहर
									ro	În ce oraș este fabrica de bere Heineken?	oraș, fabrica de bere Heineken
			7	date	false	true	false		en	When did Operation Overlord commence?	when, Operation Overlord, commence		SELECT DISTINCT ?d WHERE { <http://dbpedia.org/resource/Operation_Overlord> <http://dbpedia.org/ontology/date> ?d . }			date				literal	1944-08-30
									pt_BR	Quando começou a Operação Overlord?	começou, Operação Overlord
									fa	نبرد خان بزرگ کی شروع شد؟	نبرد خان بزرگ، شروع
									de	Wann wurde die Operation Overlord durchgeführt?	Operation Overlord, Datum
									es	¿Cuándo comenzó la operación Overlord?	comienzo, operación Overlord
									it	Quando è iniziata l'operatione Overlord?	data di inizio, operatione Overlord
									fr	Quand a commencé l'opération Overlord?	date de commencement, opération Overlord
									nl	Wanneer vond Operatie Overlord plaats?	Operatie Overlord, datum
									hi_IN	ऑपरेशन ओवेरलोर्ड कब शुरू हुआ था?	ऑपरेशन ओवेरलोर्ड
									ro	Când a început operațiunea Overlord?	când, început, operațiunea Overlord
			8	resource	false	true	false		en	In which city does the Chile Route 68 end?	city, Chile Route 68, ends		SELECT DISTINCT ?uri WHERE { <http://dbpedia.org/resource/Chile_Route_68> <http://dbpedia.org/ontology/routeEnd> ?uri . }			uri							uri	http://dbpedia.org/resource/Valparaíso
									pt_BR	Em que cidade termina a Rota 68 do Chile?	cidade, Rota 68, termina
									fa	در کدام شهر مسیر 68 شیلی پایان می یابد؟	شهر، مسیر 68 شیلی، پایان
									de	In welcher Stadt hört die Ruta 68 auf?	Stadt, aufhören, Ruta 68
									es	¿En que ciudad termina la ruta Chilena 68?	ciudad, termina, ruta Chilena 68
									it	In quale città termina la Route 68 in Cile?	città, termina, Route 68, Cile
									fr	Dans quelle ville se termine la route 68 chilienne?	route 68, chili, ville, terminaison
									nl	In welke stad eindigt de Route 68 in Chili?	stad, eindigt, Route 68, Chili
									hi_IN	चिली रूट 68 का अंत कौनसे शहर में होता है?	चिली रूट 68, शहर
									ro	În ce oraș se termină Route 68 din Chile?	oraș, termină, Route 68, Chile
			9	resource	false	true	false		en	Who developed Slack?	developer, Slack		SELECT DISTINCT ?uri WHERE { ?uri <http://dbpedia.org/ontology/product> <http://dbpedia.org/resource/Slack_(software)> . }			uri							uri	http://dbpedia.org/resource/Slack_Technologies
									pt_BR	Quem desenvolveu o Slack?	começou, Operação Overlord
									fa	اسلک را چه کسی توسعه داد؟	اسلک، توسعه
									de	Wer hat Slack entwickelt?	Slack, Entwickler
									es	¿Quien desarrolló Slack?	desarrollador, Slack
									it	Chi ha sviluppato Slack?	sviluppatore, Slack
									fr	Qui est le développeur de Slack?	développeur, Slack
									nl	Wie ontwikkelde Slack?	Slack, ontwikkelaar
									hi_IN	कौन ने स्लैक विकसित किया है?	स्लैक, विकासक
									ro	Cine a dezvoltat Slack?	dezvoltator, Slack
			10	resource	false	true	false		en	Who was married to president Chirac?	married to, president Chirac		PREFIX dbo: <http://dbpedia.org/ontology/> PREFIX res: <http://dbpedia.org/resource/> SELECT DISTINCT ?uri WHERE { res:Jacques_Chirac dbo:spouse ?uri . }			uri							uri	http://dbpedia.org/resource/Bernadette_Chirac
									pt_BR	Quem foi casada com o presidente Chirac?	casada, presidente Chirac
									de	Wer war mit Präsident Chirac verheiratet?	verheiratet mit, Päsident Chirac
									es	¿Quién estuvo casado con el presidente Chirac?	casado con, presidented Chirac
									it	Chi è stato sposato con il presidente Chirac?	sposato con, presidente Chirac
									fr	Qui était marrié avec le président Chirac?	épouse, président Chirac
									nl	Wie was met president Chirac getrouwd?	getrouwd met, president Chirac
									hi_IN	राष्ट्रपति चिराक से किसने विवाह किया था?	राष्ट्रपति चिराक, विवाह
									ro	Cine a fost căsătorit cu președintele Chirac?	căsătorit cu, președintele Chirac
			11	resource	false	true	false		en	What did Bruce Carver die from?	Bruce Carver, die		PREFIX res: <http://dbpedia.org/resource/> PREFIX dbo: <http://dbpedia.org/ontology/> SELECT DISTINCT ?uri WHERE { res:Bruce_Carver dbo:deathCause ?uri . }			uri							uri	http://dbpedia.org/resource/Cancer
									pt_BR	De que morreu Bruce Carver?	morreu, Bruce Carver
									de	Woran ist Bruce Carver gestorben?	Bruce Carver, gestorben an
									es	¿De qué murió Bruce Carver?	Bruce Caver, muerte
									it	Di cosa è morto Bruce Carver?	Bruce Caver, morire
									fr	Quel est la cause de décès de Bruce Carver?	cause de décès, Bruce Carver
									nl	Waaraan overleed Bruce Carver?	Bruce Carver, gestorven aan
									hi_IN	ब्रूस कार्वर कि मृत्यु किस से हुई?	ब्रूस कार्वर, मृत्यु
			12	resource	false	false	false		en	Who painted The Storm on the Sea of Galilee?	The Storm on the Sea of Galilee, paint		PREFIX dbp: <http://dbpedia.org/property/> PREFIX res: <http://dbpedia.org/resource/> SELECT DISTINCT ?uri WHERE { res:The_Storm_on_the_Sea_of_Galilee dbp:artist ?uri . }			uri							uri	http://dbpedia.org/resource/Rembrandt
									pt_BR	Quem pintou Tormenta no Mar da Galileia?	pintou, Tormenta no Mar da Galileia
									de	Wer malte Christus im Sturm auf dem See von Galilea?	Christus im Sturm auf dem See von Galilea, malen
									es	¿Quién pintó el Cristo en la tormenta en el lago de Galilea?	Cristo en la tormenta en el lago de Galilea, pintor
									it	Chi dipinse il Cristo nella tempesta sul mare di Galilea?	Cristo nella tempesta sul mare di Galilea, pittore
									fr	Qui a peint Christ dans la tempête sur la mer de Galilée?	peintre, Christ dans la tempête sur la mer de Galilée
									nl	Wie schilderde Christus in de storm op het meer van Galilea?	schilder, Christus in de storm op het meer van Galilea
									hi_IN	किसने गलील के सागर पर द स्टॉर्म को चित्रित किया?	गलील सागर, द स्टॉर्म, चित्रित
			13	resource	false	true	false		en	Which cities does the Weser flow through?	Weser, flow through, city		SELECT DISTINCT ?uri WHERE { <http://dbpedia.org/resource/Weser> <http://dbpedia.org/ontology/city> ?uri . }			uri							uri	http://dbpedia.org/resource/Fulda_(river)
									pt_BR	Em quais cidades o rio Weser passa?	cidades, rio Weser, passa												uri	http://dbpedia.org/resource/Kassel
									fa	وزر از چه شهرهایی می گذرد؟	وزر، شهرهایی، می گذرد												uri	http://dbpedia.org/resource/Minden
									de	Durch welche Städte fließt die Weser?	Weser, fließen, Stadt												uri	http://dbpedia.org/resource/Bremerhaven
									es	¿Por qué ciudades pasa el río Weser?	cuidad, pasa, Weser												uri	http://dbpedia.org/resource/Bremen
									it	Attraverso quali città scorre il fiume Weser?	città, scorrere, fiume Weser												uri	http://dbpedia.org/resource/Hamelin
									fr	Quels sont les villes traversées par la Weser?	villes, traverser, Weser												uri	http://dbpedia.org/resource/Hann._Münden
									nl	Door welke steden loopt de Weser?	stad, loopt door, Weser
									hi_IN	किन शहरों से वेसर का प्रवाह होता है?	वेसर, शहरो, प्रवाह
									ro	Ce orașe străbate Weserul?	Weser, străbate, oraș
			14	resource	false	true	false		en	How many seats does the home stadium of FC Porto have?	How many seats, stadium of FC Porto		SELECT DISTINCT ?n WHERE { <http://dbpedia.org/resource/FC_Porto> <http://dbpedia.org/ontology/ground> ?x . ?x <http://dbpedia.org/ontology/seatingCapacity> ?n . }			uri							uri	50035
									pt_BR	Quantas cadeiras tem o estádio do Futebol Clube do Porto	cadeiras, estádio, Futebol Clube do Porto
									fa	ورزشگاه باشگاه پورتو چند صندلی دارد؟	ورزشگاه باشگاه پورتو، چند صندلی
									de	Wieviele Plätze hat das Heimstadium des FC Porto?	FC Porto, Heimstadium, wieviele, Plätze
									es	¿Cuántos asientos tiene el estadio del FC Porto?	asientos, estadio FC Porto
									it	Quanti posti a sedere ha lo stadio del FC Porto	posti a sedere, stadio del FC Porto
									fr	Quel est le nombre de sièges dans le stade de FC Porto?	nombre de sièges, stade, FC Porto
									nl	Hoeveel plaatsen heeft het stadion van FC Porto?	plaatsen, stadion, FC Porto
									hi_IN	एफसी पोर्टो के घर स्टेडियम में कितनी सीटें हैं?	एफसी पोर, सीटें, स्टेडियम
									ro	Câte locuri are stadionul lui FC Porto?	Câte locuri, stadionul lui FC Porto
			15	resource	false	true	false		en	Who is the daughter of Robert Kennedy married to?	Robert Kennedy, daughter, married		SELECT DISTINCT ?uri WHERE { <http://dbpedia.org/resource/Robert_F._Kennedy> <http://dbpedia.org/ontology/child> ?child . ?child <http://dbpedia.org/ontology/spouse> ?uri . }			uri							uri	http://dbpedia.org/resource/Cheryl_Hines
									pt_BR	Com quem a filha de Robert Kennedy casou-se?	casada, filha, Robert Kennedy												uri	http://dbpedia.org/resource/Andrew_Cuomo
									fa	دختر رابرت کندی با چه کسی ازدواج کرده است؟	دختر، رابرت کندی، ازدواج
									de	Mit wem ist die Tochter von Robert Kennedy verheiratet?	Robert Kennedy, Tochter, verheiratet
									es	¿Con quién está casada la hija de Robert Kennedy?	Robert Kennedy, hija, casada
									it	Con chi è sposata la figlia di Robert Kennedy?	Robert Kennedy, figlia, sposata
									fr	Qui est l'époux de la fille de Robert Kennedy?	épou, fille, Ingrid Bergman
									nl	Met wie is de dochter van Robert Kennedy getrouwd?	Robert Kennedy, dochter, getrouwd
									hi_IN	रॉबर्ट कैनेडी की बेटी की कौन से शादी हुइ है?	रॉबर्ट कैनेडी, बेटी, शादी
									ro	Cu cine este căsătorită fiica lui Robert Kennedy?	Robert Kennedy, fiică, căsătorită
			16	resource	false	true	false		en	Which books by Kerouac were published by Viking Press?	book, Kerouac, publish, Viking Press		SELECT DISTINCT ?uri WHERE { ?uri <http://www.w3.org/1999/02/22-rdf-syntax-ns#type> <http://dbpedia.org/ontology/Book> . ?uri <http://dbpedia.org/ontology/publisher> <http://dbpedia.org/resource/Viking_Press> . ?uri <http://dbpedia.org/ontology/author> <http://dbpedia.org/resource/Jack_Kerouac> . }			uri							uri	http://dbpedia.org/resource/On_the_Road
									pt_BR	Que livros de Kerouac foram publicados pela Viking Press?	livros, Kerouac, publicados,Viking Press												uri	http://dbpedia.org/resource/Door_Wide_Open
									fa	چه کتاب هایی اثر کرواک توسط انتشارات وایکینگ منتشر شدند؟	کتاب هایی، کرواک، انتشارات وایکینگ، منتشر												uri	http://dbpedia.org/resource/Atop_an_Underwood:_Early_Stories_and_Other_Writings
									de	Welche Bücher von Kerouac wurden von Viking Press verlegt?	Buch, Kerouac, verlegen, Viking Press
									es	¿Qué libros de Kerouac han sido publicados por Viking Press?	libro, Kerouac, publicado, Viking Press
									it	Quali libri di Kerouac furono pubblicati da Viking Press?	libro, Kerouac, pubblicare, Viking Press
									fr	Quels lives de Kerouac ont été publiés par Viking Press?	lives de Kerouac, publiés, Viking Press
									nl	Welke boeken van Jack Kerouac werden uitgegeven door Viking Press?	boek, Jack Kerouac, uitgever, Viking Press
									hi_IN	वाइकिंग प्रेस द्वारा कैरौक की कौन सी किताबें प्रकाशित की गई थीं?	वाइकिंग प्रेस, कैरौक, प्रकाशित
									ro	Ce cărți de Kerouac a fost publicate de Viking Press?	carte, Kerouac, publica, Viking Press
			17	number	false	true	false		en	How tall is Amazon Eve?	Amazon Eve, tall		SELECT DISTINCT ?height WHERE { <http://dbpedia.org/resource/Amazon_Eve> <http://dbpedia.org/ontology/height> ?height . }			c										literal	2.02
									pt_BR	Qual a altura de Amazon Eve?	altura, Amazon Eve
									fa	قد آمازون ایو چقدر است؟	قد، آمازون ایو
									de	Wie groß ist Amazon Eve?	Amazon Eve, groß
									es	¿Cómo de alta es Amazon Eve?	Amazon Eve, altura
									it	Quanto è alta Amazon Eve?	Amazon Eve, altezza
									fr	Quelle est la taille de Amazon Eve?	taille, Amazon Eve
									nl	Hoe lang is Amazon Eve?	lengte, Amazon Eve
									hi_IN	अमेज़ॅन ईव कितनी लंबी है?	अमेज़ॅन ईव, लंबी
									ro	Ce înălțime are Amazon Eve?	Amazon Eve, înălțime
			18	resource	false	true	false		en	Which museum exhibits The Scream by Munch?	museum, Scream, Munch		PREFIX dbo: <http://dbpedia.org/ontology/> PREFIX res: <http://dbpedia.org/resource/> SELECT DISTINCT ?uri WHERE { res:The_Scream dbo:museum ?uri . }			uri							uri	http://dbpedia.org/resource/National_Gallery_(Norway)
									pt_BR	Em que museu está exposto O Grito de Munch?	museu, exposto, O Grito, Munch
									de	In welchem Museum ist Der Schrei von Munch ausgestellt?	Museum, Schrei, Munch
									es	¿En qué museo está expuesto el Grito de Munch?	museo, El Grito, Munch
									it	In quale museo è esposto l'Urlo di Munch?	museo, l'Urlo, Munch
									fr	Dans quel musée est exposé Le Cri de Munch?	musée, le Cri, Munch
									nl	In welk museum hangt De Schreeuw van Munch?	museum, De Schreeuw, Munch
									hi_IN	कौन सा संग्रहालय मंच द्वारा द स्क्रीम प्रदर्शित करता है?	संग्रहालय, मंच, द स्क्रीम, प्रदर्शित
									ro	În ce muzeu este expus “Strigătul” lui Munch?	muzeu, Strigătul, Munch
			19	resource	false	true	false		en	Who wrote the book Les Piliers de la terre?	wrote, book, The pillars of the Earth		PREFIX dbo: <http://dbpedia.org/ontology/> PREFIX res: <http://dbpedia.org/resource/> SELECT DISTINCT ?uri WHERE { res:The_Pillars_of_the_Earth dbo:author ?uri . }			uri							uri	http://dbpedia.org/resource/Ken_Follett
									pt_BR	Quem escreveu o livro Os Pilares da Terra?	escritor, livro, Os Pilares da Terra
									de	Wer schrieb das Buch Die Säulen der Erde?	schreiben, Buch, Die Säulen der Erde
									es	¿Quen escribió el libro Los pilares de la Tierra?	escritor, libro, Pilares de la Tierra
									it	Chi ha scritto il libro I pilastri della Terra?	scritto, libro, I pilastri della Terra
									fr	Qui a écrit le livre Les Piliers de la terre?	Les Piliers de la terre, écrivain
									nl	Wie schreef het boek De Pilaren van de Aarde?	auteur, De Pilaren van de Aarde
									hi_IN	लेस पिलीरेस डी ला टेरे किताब को किसने लिखा है?	लेस पिलीरेस डी ला टेर, लेखक
			20	boolean	false	true	false		en	Is James Bond married?	James Bond, married		PREFIX dbo: <http://dbpedia.org/ontology/> PREFIX res: <http://dbpedia.org/resource/> ASK WHERE { res:James_Bond dbo:spouse ?uri . }																					false
									pt_BR	James Bond é casado?	James Bond, casado
									de	Ist James Bond verheiratet?	James Bond, verheiratet
									es	¿Está James Bond casado?	James Bond, casado
									it	James è Bond sposato?	James Bond, sposato
									fr	James Bond est-il marié?	James Bond, marié
									nl	Is James Bond getrouwd?	James Bond, getrouwd
									hi_IN	क्या जेम्स बांड ने शादी की है?	जेम्स बांड, शादी
									ro	James Bond este căsătorit?	James Bond, căsătorit
			21	resource	false	true	false		en	Who discovered Ceres?	discoverer, Ceres		SELECT DISTINCT ?uri WHERE { <http://dbpedia.org/resource/Ceres_(dwarf_planet)> <http://dbpedia.org/ontology/discoverer> ?uri . }			uri							uri	http://dbpedia.org/resource/Giuseppe_Piazzi
									pt_BR	Quem descobriu Ceres?	descobridor, Ceres
									fa	سرس را چه کسی کشف کرد؟	سرس، کشف
									de	Wer entdeckte Ceres?	Ceres, Entdecker
									es	¿Quién descubrió Ceres?	descubridor, Ceres
									it	Chi ha scoperto Cerere?	scopritore, Cerere
									fr	Qui a découvert Cérès?	découvreur, Cérès
									nl	Wie ontdekte Ceres?	Ceres, ontdekker
									hi_IN	सेरेस की खोज किसने की?	सेरेस, खोज
									ro	Cine l-a descoperit pe Ceres?	descoperitor, Ceres
			22	resource	false	true	false		en	Which river does the Brooklyn Bridge cross?	river, cross, Brooklyn Bridge		PREFIX dbo: <http://dbpedia.org/ontology/> PREFIX res: <http://dbpedia.org/resource/> SELECT DISTINCT ?uri WHERE { res:Brooklyn_Bridge dbo:crosses ?uri . }			uri							uri	http://dbpedia.org/resource/East_River
									pt_BR	Que rio a Ponte do Brooklyn cruza?	rio, Ponte do Brooklyn, cruza
									de	Welchen Fluss überspannt die Brooklyn Bridge?	Fluss, überspannen, Brooklyn Bridge
									es	¿Por qué río cruza la Brooklyn Bridge?	río, cruza, Brooklyn Bridge
									it	Quale fiume attraversa il ponte di Brooklyn?	fiume, attraversare, ponte di Brooklyn
									fr	Quelle cours d'eau est traversé par le pont de Brooklyn?	cours d'eau, pont de Brooklyn
									nl	Welke rivier overspant de Brooklyn Bridge?	rivier, Brooklyn Bridge, overspant
									hi_IN	ब्रुकलिन ब्रिज को कोनसी नदी पार करती है?	ब्रुकलिन ब्रिज, नदी
			23	resource	false	false	false		en	Who was called Frank The Tank?	called, Frank The Tank		PREFIX dbp: <http://dbpedia.org/property/> SELECT DISTINCT ?uri WHERE { ?uri dbp:nickname 'Frank The Tank'@en . }			uri							uri	http://dbpedia.org/resource/Frank_Young_(basketball)
									pt_BR	Quem foi chamado de Frank The Tank?	chamado, Frank The Tank
									de	Wer wurde Frank The Tank genannt?	nennen, Frank The Tank
									es	¿Quién era llamado Frank The Tank?	llamado, Frank The Tank
									it	Chi venne chiamato Frank The Tank?	chiamare, Frank The Tank
									fr	Qui était surnommé Frank The Tank?	surnommé, Frank The Tank
									nl	Wie werd er Frank The Tank genoemd?	Frank The Tank, bijnaam
									hi_IN	कौनको फ्रैंक द टैंक कहा जाता था?	फ्रैंक द टैंक
									ro	Cine era numit Frank The Tank?	numit, Frank The Tank
			24	resource	true	true	false		en	What is the largest country in the world?	largest country, world		SELECT DISTINCT ?uri WHERE { ?uri a <http://dbpedia.org/ontology/Country> . ?uri <http://dbpedia.org/ontology/areaTotal> ?n . } ORDER BY DESC(?n) OFFSET 0 LIMIT 1			uri							uri	http://dbpedia.org/resource/Organization_for_Security_and_Co-operation_in_Europe
									pt_BR	Qual é o maior país do mundo	maior país, mundo
									fa	بزرگترین کشور در دنیا کدام است؟	بزرگترین کشور، دنیا
									de	Was ist das größte Land der Welt?	größtes Land
									es	¿Cuál es el país más grande del mundo?	país, más grande mundo
									it	Qual è la nazione più grande al mondo?	nazione, più grande al mondo
									fr	Quel est le pays le plus grand du monde?	Pays, grandeur maximale
									nl	Wat is het grootse land ter wereld?	grootste land
									hi_IN	दुनिया का सबसे बड़ा देश क्या है?	सबसे बड़ा, देश
									ro	Care este cea mai mare țară din lume?	cea mai mare țară, lume
			25	resource	false	true	false		en	Who is the mayor of Paris?	mayor, Paris		SELECT DISTINCT ?uri WHERE { <http://dbpedia.org/resource/Paris> <http://dbpedia.org/ontology/mayor> ?uri . }			uri							uri	http://dbpedia.org/resource/Anne_Hidalgo
									pt_BR	Quem é o prefeito de Paris?	prefeito, Paris
									fa	شهردار پاریس کیست؟	شهردار، پاریس
									de	Wer ist Bürgermeister von Paris?	Paris, Bürgermeister
									es	¿Quién es el alcalde de París?	alcalde París
									it	Chi è il sindaco di Parigi?	sindaco di Parigi
									fr	Qui est le maire de Paris?	maire, Paris
									nl	Wie is de burgemeester van Parijs?	burgemeester, Parijs
									hi_IN	पेरिस का महापौर कौन है?	पेरिस, महापौर
									ro	Cine este primarul Parisului?	primarul Parisului
			26	resource	false	true	false		en	Who is the coach of Ankara's ice hockey team?	coach, ice hockey team, Ankara		SELECT DISTINCT ?uri WHERE { ?x <http://dbpedia.org/ontology/city> <http://dbpedia.org/resource/Ankara> . ?x <http://dbpedia.org/ontology/league> <http://dbpedia.org/resource/Turkish_Ice_Hockey_First_League> . ?x <http://dbpedia.org/ontology/coach> ?uri . }			uri							uri	http://dbpedia.org/resource/İbrahim_Oğuz
									pt_BR	Quem é o treinador da equipe de hockey no gelo de Ankara?	treinador, equipe de hockey no gelo, Ankara
									fa	سرمربی تیم هاکی آنکارا کیست؟	سرمربی، تیم هاکی آنکارا
									de	Wer ist der Trainer von Ankaras Eishockeymannschaft?	Ankara, Eishockeymannschaft, Trainer
									es	¿Quién es el entrenador del equipo de hockey sobre hielo de Ankara?	entrenador, equipo hockey sobre hielo, Ankara
									it	Chi è l'allenatore della squadra di hockey di Ankara?	allenatore, squadra di hockey, Ankara
									fr	Qui est le coach de l'équipe d'hockey sur glace d'Ankara?	coach, hockey sur glace, Ankara
									nl	Wie is de coach van het ijshockey team van Ankara.	coach, ijshockey team, Ankara
									hi_IN	अंकारा के आइस हॉकी टीम का कोच कौन है?	अंकारा, आइस हॉकी टीम, कोच
									ro	Cine este antrenorul echipei de hochei pe gheață din Ankara?	antrenor, echipa de hochei pe gheață, Ankara
			27	resource	false	true	false		en	Who is the mayor of the capital of French Polynesia?	mayor, capital, French Polynesia		PREFIX dbo: <http://dbpedia.org/ontology/> PREFIX res: <http://dbpedia.org/resource/> SELECT DISTINCT ?uri WHERE { res:French_Polynesia dbo:capital ?x . ?x dbo:mayor ?uri . }			uri							uri	http://dbpedia.org/resource/Michel_Buillard
									pt_BR	Quem é o prefeito da capital da Polinésia Francessa?	prefeito, capital, Polinésia Francesa
									de	Wer ist der Bürgermeister der Hauptstadt von Französisch-Polynesien?	Bürgermeister, Hauptstadt, Französisch-Polynesien
									es	¿Quien es el alcalde de la capital de la Polinesia Francesa?	alcalde, capital Polinesia Francesa
									it	Chi è il sindaco della capitale della Polinesia Francese?	sindaco, capitale, Polinesia Francese
									fr	Qui est le maire de la capitale de la Polynésie Francaise?	maire, capitale, Polynésie Francaise
									nl	Wie is de burgermeester van de hoofdstad van Frans-Polynesië?	burgermeester, hoofdstad, Frans-Polynesië
									hi_IN	फ्रेंच पोलिनेशिया की राजधानी का महापौर कौन है?	फ्रेंच पोलिनेशिया, राजधानी, महापौर
									ro	Cine este primarul capitaliei Polineziei Franceze?	primar, capitală, Polinezia Franceză
			28	resource	false	true	false		en	Which awards did Douglas Hofstadter win?	Douglas Hofstadter, award		PREFIX res: <http://dbpedia.org/resource/> PREFIX dbo: <http://dbpedia.org/ontology/> SELECT DISTINCT ?uri WHERE { res:Douglas_Hofstadter dbo:award ?uri . }			uri							uri	http://dbpedia.org/resource/National_Book_Award
									pt_BR	Que prêmios Douglas Hofstadter ganhou?	prêmios, Douglas Hofstadter												uri	http://dbpedia.org/resource/American_Academy_of_Arts_and_Sciences
									de	Welche Preise hat Douglas Hofstadter gewonnen?	Douglas Hofstadter, Preise												uri	http://dbpedia.org/resource/Pulitzer_Prize
									es	¿Qué premios ha ganado Douglas Hofstadter?	Douglas Hofstadter, premios
									it	Quali premi ha vinto Douglas Hofstadter?	Douglas Hofstadter, premio
									fr	Quels prix ont été gagnés par Douglas Hofstadter?	Douglas Hofstadter, prix
									nl	Welke prijzen heeft Douglas Hofstadter gewonnen?	Douglas Hofstadter, prijs
									hi_IN	डगलस हॉफस्टैडर ने किन पुरस्कारों को जीता है?	डगलस हॉफस्टैडर, पुरस्कार, जीत
									ro	Ce premii a câștigat Douglas Hofstadter?	Douglas Hofstadter, premii
			29	string	false	true	false		en	How much did the Lego Movie cost?	Lego Movie, cost		SELECT DISTINCT ?n WHERE { <http://dbpedia.org/resource/The_Lego_Movie> <http://dbpedia.org/ontology/budget> ?n . }			string													literal	6.0E7
									pt_BR	Quanto custou The Lego Movie?	custou, The Lego Movie
									fa	فیلم لگو چقدر هزینه داشت؟	فیلم لگو، هزینه
									de	Wieviel hat der Legofilm gekostet?	Legofilm, Budget
									es	¿Cuánto cuesta la película de Lego?	precio, película de Lego
									it	Quanto è costato il Lego Movie?	costo, Lego Movie
									fr	Combien a coûté le film de Légo	prix, film de Légo
									nl	Hoveel heeft de Lego Movie gekost?	Lego Movie, kosten
									hi_IN	लेगो मूवी की लागत कितनी थी?	लेगो मूवी, लागत
									ro	Cât de mult a costat filmul Lego?	filmul Lego, costa
			30	resource	false	true	false		en	Where does Piccadilly start?	Piccadilly, start		SELECT DISTINCT ?uri WHERE { ?uri <http://dbpedia.org/ontology/routeStart> <http://dbpedia.org/resource/Piccadilly>. }			uri							uri	http://dbpedia.org/resource/Dover_Street
									pt_BR	Onde começa a Piccadilly?	começa, Picadilly
									de	Wo fängt Piccadilly an?	Start, Piccadilly
									es	¿Dónde empieza Piccadilly?	principio, Piccadilly
									it	Dove inizia Piccadilly?	Piccadilly, iniziare
									fr	Où commence Piccadilly?	début, Piccadilly
									nl	Waar begint Piccadilly?	Piccadilly, begin
									hi_IN	पिकाडिली कहां शुरू होती है?	पिकाडिली, शुरू
									ro	Unde începe Piccadilly?	Piccadilly, început
			31	boolean	true	true	false		en	Do Prince Harry and Prince William have the same parents?	Prince Harry, Prince William, same, parents		PREFIX dbo: <http://dbpedia.org/ontology/> ASK WHERE { <http://dbpedia.org/resource/Prince_William,_Duke_of_Cambridge> dbo:parent ?x . <http://dbpedia.org/resource/Prince_Harry> dbo:parent ?x . }																					true
									pt_BR	O Príncipe Harry e o Príncipe William têm os mesmos pais?	Príncipe Harry, Príncipe William, mesma mãe
									de	Haben Prinz Harry und Prinz William dieselben Eltern?	Prinz Harry, Prinz William, selbe Eltern
									es	¿Tienen el príncipe Harry y el prínciple William la misma madre?	príncipe Harry, príncipe William, la misma madre
									it	Il principe Harry e il principe William hanno gli stessi genitoris?	principe Harry, principe William, stessi genitori
									fr	Ont les princes Harry et William la même mère?	prince Harry, Prince William, même mère
									nl	Hebben prins Harry en prins William dezelfde ouders?	prins Harry, prins William, dezelfde, ouders
									hi_IN	क्या प्रिंस हैरी और प्रिंस विलियम के माता-पिता एक हैं?	प्रिंस हैरी, प्रिंस विलियम, माता, पिता
									ro	Prințul Harry și Prințul William au aceiași părinți?	Prințul Harry, Prințul William, aceiași, părinți
			32	resource	false	false	false		en	Who played Agent Smith in Matrix?	played, Agent Smith, Matrix		PREFIX dbp: <http://dbpedia.org/property/> PREFIX res: <http://dbpedia.org/resource/> SELECT DISTINCT ?uri WHERE { res:Agent_Smith dbp:portrayer ?uri . }			uri							uri	http://dbpedia.org/resource/Hugo_Weaving
									pt_BR	Quem interpretou o Agente Smith em Matrix?	interpretou, Agente Smith, Matrix												uri	http://dbpedia.org/resource/Ian_Bliss
									de	Wer hat Agent Smith in Matrix gespielt?	gespielt, Agent Smith, Matrix
									es	¿Quien actuó como el agente Smith en Matrix?	actor, agente Smith, Matrix
									it	Chi interpretava l'agente Smith in Matrix?	attore, agente Smith, Matrix
									fr	Qui a joué Agent Smith dans Matrix?	acteur, Agent Smith, Matrix
									nl	Wie speelde Agent Smith in Matrix?	speelde, Agent Smith, Matrix
									hi_IN	मैट्रिक्स में किसने एजेंट स्मिथ को निभाया है ?	मैट्रिक्स, एजेंट, स्मिथ, निभाया
									ro	Cine l-a jucat pe Agent Smith în Matrix?	jucat, Agent Smith, Matrix
			33	number	true	true	false		en	How many languages are spoken in Turkmenistan?	languages, Turkmenistan		SELECT (COUNT(DISTINCT ?x) as ?c) WHERE { <http://dbpedia.org/resource/Turkmenistan> <http://dbpedia.org/ontology/language> ?x . }			c										literal	2
									pt_BR	Quantos idiomas são falados no Turquemenistão?	idiomas, falados, Turcomenistão
									fa	چند زبان در ترکمنستان صحبت می شود؟]	زبان، ترکمنستان
									de	Wieviele Sprachen werden in Turkmenistan gesprochen?	Sprachen, Turkmenistan
									es	¿Cuántos idiomas se hablan en Turkmenistán?	idiomas, Turkmenistán
									it	Quante lingue sono parlate in Turkmenistan?	lingue, Turkmenistan
									fr	Combien de langues sont parlées au Turkménistan?	langues, Turkménistan
									nl	Hoeveel talen worden er gesproken in Turkmenistan?	talen, Turkmenistan
									hi_IN	तुर्कमेनिस्तान में कितनी भाषाएं बोली जाती हैं?	तुर्कमेनिस्तान, भाषाएं, बोली
									ro	Câte limbi sunt vorbite în Turkmenistan?	limbi, Turkmenistan
			34	resource	false	true	false		en	In which films did Julia Roberts as well as Richard Gere play?	film, play, Julia Roberts, Richard Gere		SELECT DISTINCT ?uri WHERE { ?uri <http://www.w3.org/1999/02/22-rdf-syntax-ns#type> <http://dbpedia.org/ontology/Film> . ?uri <http://dbpedia.org/ontology/starring> <http://dbpedia.org/resource/Julia_Roberts> . ?uri <http://dbpedia.org/ontology/starring> <http://dbpedia.org/resource/Richard_Gere> . }			uri							uri	http://dbpedia.org/resource/Runaway_Bride_(film)
									pt_BR	Em que filmes Julia Roberts e Richard Gere atuaram?	filme, atuaram, Julia Roberts, Richard Gere												uri	http://dbpedia.org/resource/Pretty_Woman
									fa	در چه فیلم هایی جولیا رابرتس همچنین ریچارد گییر بازی کردند؟	فیلم هایی، جولیا رابرتس، ریچارد گییر، بازی
									de	In welchen Filmen spielen sowohl Julia Roberts als auch Richard Gere mit?	Film, mitspielen, Julia Roberts, Richard Gere
									es	¿En qué películas actúan Julia Roberts y Richard Gere?	película, actores, Julia Roberts, Richard Gere
									it	In quali film recitano sia Julia Roberts che Richard Gere?	film, recitare, Julia Roberts, Richard Gere
									fr	Dans quels films jouent Julia Roberts et Richard Gere?	films, Julia Roberts, Richard Gere
									nl	In welke films speelden zowel Julia Roberts als Richard Gere?	film, speel, Julia Roberts, Richard Gere
									hi_IN	जूलिया रॉबर्ट्स और रिचर्ड गेरे ने किस फिल्म में अभिनय किया था?	जूलिया रॉबर्ट्स, रिचर्ड गेरे, फिल्म, अभिनय
									ro	În ce filme joacă Julia Roberts precum și Richard Gere?	film, joacă, Julia Roberts, Richard Gere
			35	resource	false	true	false		en	In which country does the Ganges start?	Ganges, start, country		PREFIX dbo: <http://dbpedia.org/ontology/> PREFIX res: <http://dbpedia.org/resource/> SELECT DISTINCT ?uri WHERE { res:Ganges dbo:sourceCountry ?uri . }			uri							uri	http://dbpedia.org/resource/India
									pt_BR	Em que país nasce o Ganges?	país, nasce, Ganges
									de	In welchem Land entspringt der Ganges?	Ganges, entspringen, Land
									es	¿En qué país nace el Ganges?	Ganges, país, orígen
									it	In quale stato nasce il Gange?	Gange, stato, origine
									fr	Dans quel pays commence le Gange?	pays, commence, Gange
									nl	In welk land ontspringt de Ganges?	ontspringt, Ganges
									hi_IN	गंगा किस देश में शुरू होती है?	गंगा, देश, शुरू
									ro	Din ce țară izvorăște Ganga?	Gangele, izvor, țară
			36	date	false	true	false		en	In which year was Rachel Stevens born?	year, born, Rachel Stevens		SELECT DISTINCT ?uri WHERE { <http://dbpedia.org/resource/Rachel_Stevens> <http://dbpedia.org/ontology/birthYear> ?uri . }			date				literal	1978
									pt_BR	Em que ano nasceu Rachel Stevens?	ano, nasceu, Rachel Stevens
									fa	ریچل استیونز در چه سالی متولد شد؟	ریچل استیونز، سالی، متولد
									de	In welchem Jahr wurde Rachel Stevens geboren?	Jahr, geboren, Rachel Stevens
									es	¿En que año nació Rachel Stevens?	año, nació, Rachel Stevens
									it	In quale anno è nata Rachel Stevens?	anno nascita, Rachel Stevens
									fr	Quand est née Rachel Stevens?	année de naissance, Rachel Stevens
									nl	In welk jaar word Rachel Stevens geboren?	jaar, geboren, Rachel Stevens
									hi_IN	रेचल स्टीवंस का जन्म किस साल हुआ था?	रेचल स्टीवंस, जन्म, साल
									ro	În ce an s-a născut Rachel Stevens?	an, născut, Rachel Stevens
			37	boolean	false	true	false		en	Is Barack Obama a democrat?	Barack Obama, democrat		PREFIX dbo: <http://dbpedia.org/ontology/> PREFIX res: <http://dbpedia.org/resource/> ASK WHERE { res:Barack_Obama dbo:party <http://dbpedia.org/resource/Democratic_Party_(United_States)> . }																					true
									pt_BR	Barack Obama é um Democrata?	Barack Obama, Demokrat
									de	Ist Barack Obama ein Demokrat?	Barack Obama, Demokrat
									es	¿Es Barack Obama demócrata?	Barack Obama, demócrata
									it	Barack Obama è un democratico?	Barack Obama, democratico
									fr	Barack Obama est-il un démocrate?	Barack Obama, démocrate
									nl	Is Barack Obama een democraat?	Barack Obama, democraat
									hi_IN	क्या बराक ओबामा एक डेमोक्रेट है?	बराक ओबामा, डेमोक्रेट
									ro	Barack Obama este un democrat?	Barack Obama, democrat
			38	resource	false	true	false		en	Where was Bach born?	birthplace, Bach		PREFIX dbo: <http://dbpedia.org/ontology/> PREFIX res: <http://dbpedia.org/resource/> SELECT DISTINCT ?uri WHERE { res:Johann_Sebastian_Bach dbo:birthPlace ?uri . }			uri							uri	http://dbpedia.org/resource/Eisenach
									pt_BR	Onde nasceu Bach?	Bach, geboren
									de	Wo wurde Bach geboren?	Bach, geboren
									es	¿Dónde nació Bach?	Bach, lugar de nacimiento
									it	Dove è nato Bach?	Bach, luogo di nascita
									fr	Où est né Bach?	Lieu de naissance, Bach
									nl	Waar was Bach geboren?	Bach, geboorteplaats
									hi_IN	बाख का जन्म कहाँ हुवा था?	बाख, जन्म
									ro	Unde s-a născut Bach?	locul nașterii, Bach
			39	number	true	true	false		en	How often did Jane Fonda marry?	Jane Fonda, marry, how often		SELECT (COUNT(DISTINCT ?uri) as ?c) WHERE { <http://dbpedia.org/resource/Jane_Fonda> <http://dbpedia.org/ontology/spouse> ?uri . }			c										literal	3
									pt_BR	Quantas vezes Jane Fonda se casou?	Jane Fonda, casou
									fa	جین فوندا چند بار ازدواج کرد؟	جین فوندا، ازدواج
									de	Wie oft hat Jane Fonda geheiratet?	Jane Fonda, heiraten, wie oft
									es	¿Cuántas veces ha estado casada Jane Fonda?	Jane Fonda, casada, cuántas veces
									it	Quante volte si è sposata Jane Fonda?	Jane Fonda, sposata, quante volte
									fr	Combien de fois s'est mariée Jane Fonda?	Jane Fonda, marriages, nombre de fois
									nl	Hoe vaak is Jane Fonda getrouwd?	Jane Fonda, getrouwd, hoe vaak
									hi_IN	जेन फोंडा ने कितनी बार शादी की?	जेन फोंडा, कितनी बार, शादी
									ro	Cât de des s-a măritat Jane Fonda?	Jane Fonda, mărita, cât de des
			40	resource	false	true	false		en	Who was the first to climb Mount Everest?	first, climb, mount Everest		PREFIX res: <http://dbpedia.org/resource/> PREFIX dbo: <http://dbpedia.org/ontology/> SELECT DISTINCT ?uri WHERE { res:Mount_Everest dbo:firstAscentPerson ?uri . }			uri							uri	http://dbpedia.org/resource/Tenzing_Norgay
									pt_BR	Quem foi o primeiro a escalar o Monte Everest?	Mount Everest, besteigen, erster												uri	http://dbpedia.org/resource/Edmund_Hillary
									de	Wer hat als erstes den Mount Everest bestiegen?	Mount Everest, besteigen, erster												uri	http://dbpedia.org/resource/Krzysztof_Wielicki
									es	¿Quién fue el primero en ascender al Monte Everest?	primero, ascender, Monte Everest												uri	http://dbpedia.org/resource/Leszek_Cichy
									it	Chi è stato il primo a scalare il Monte Everest?	primo, scalare, Monte Everest
									fr	Qui est la première personne à conquerir le Mont Everest?	première personne, Mont Everest
									nl	Wie was de eerste die de Mount Everest beklom?	Mount Everest, eerste, beklimmen
									hi_IN	माउंट एवरेस्ट पर चढ़ने वाला पहला कौन था?	माउंट एवरेस्ट, चढ़ने वाला पहला
									ro	Cine a fost primul om care a escaladat muntele Everest?	primul, escaladat, muntele Everest
			41	number	false	true	false		en	How many people live in Poland?	How many people, Poland		SELECT DISTINCT ?uri WHERE { <http://dbpedia.org/resource/Poland> <http://dbpedia.org/ontology/populationTotal> ?uri . }			c										literal	38483957
									pt_BR	Quantas pessoas vivem na Polônia	pessoas, Polônia
									fa	چند نفر در لهستان زندگی می کنند؟	نفر، لهستان، زندگی
									de	Wieviele Menschen leben in Polen?	Polen, Einwohner
									es	¿Cuántas personas viven en Polonia?	Cuántas personas, habitan, Polonia
									it	Quante persone vivono in Polonia?	quante persone, Polonia
									fr	Combien de personnes vivent en Pologne?	nombre de personnnes, Pologne
									nl	Hoeveel mensen wonen er in Polen?	Polen, inwoners
									hi_IN	पोलैंड में कितने लोग रहते हैं?	पोलैंड, कितन लोग, रहते
									ro	Câți oameni locuiesc în Polonia?	câți oameni, Polonia
			42	resource	false	true	false		en	What is the location of the Houses of Parliament?	location, Houses of Parliament		SELECT ?uri WHERE { <http://dbpedia.org/resource/Palace_of_Westminster> <http://dbpedia.org/ontology/location> ?uri . }			uri							uri	http://dbpedia.org/resource/Greater_London
									pt_BR	Onde fica o Palácio de Westminster?	local, Palácio de Westminster												uri	http://dbpedia.org/resource/United_Kingdom
									fa	مکان کاخ وستمینستر کجاست؟	مکان، کاخ وستمینستر												uri	http://dbpedia.org/resource/England
									de	Wo ist der Westminster-Palast?	Ort, Westminster-Palast												uri	http://dbpedia.org/resource/City_of_Westminster
									es	¿Donde están situadas las Casas del Parlamento?	localización, casas del parlamento
									it	Dove si trova il Palazzo di Westminster?	luogo, Palazzo di Westminster
									fr	Où se trouve le palais de Westminster?	location, palais de Westminster
									nl	Waar is de Palace of Westminster?	plaats, Palace of Westminster
									hi_IN	संसद के सदनों का स्थान क्या है?	संसद के सदनों, स्थान
									ro	Care este locația Palatului Westminster?	locație, Palatul Westminster
			43	boolean	false	true	false		en	Is Christian Bale starring in Batman Begins?	Christian Bale, starring, Batman Begins		PREFIX dbo: <http://dbpedia.org/ontology/> PREFIX res: <http://dbpedia.org/resource/> ASK WHERE { res:Batman_Begins dbo:starring res:Christian_Bale . }																					false
									pt_BR	Christian Bale atua em Batman Begins?	Christian Bale, atua, Batman Begins
									de	Spielt Christian Bale in Batman Begins mit?	Christian Bale, mitspielen, Batman Begins
									es	¿Actúa Christian Bale en Batman Begins?	Christian Bale, actúa, Batman Begins
									it	Christian Bale ha recitato in Batman Begins?	Christian Bale, recitare, Batman Begins
									fr	Christian Bale joue-t-il dans Batman Begins?	Christian Bale, joue, Batman Begins
									nl	Speelt Christian Bale in Batman Begins?	Christian Bale, speelt in, Batman Begins
									hi_IN	क्या क्रिस्चियन बॉल बैटमैन बेगिंस में है?	क्रिस्चियन बॉल, बैटमैन बेगिंस
			44	resource	false	true	false		en	In which country is the Limerick Lake?	Limerick Lake, country		PREFIX dbo: <http://dbpedia.org/ontology/> PREFIX res: <http://dbpedia.org/resource/> SELECT DISTINCT ?uri WHERE { res:Limerick_Lake dbo:country ?uri . }			uri							uri	http://dbpedia.org/resource/Canada
									pt_BR	Em que país fica o Lago Limerick?	país, Lago Limerick
									de	In welchem Land befindet sich der Limerick Lake?	Limerick Lake, Land
									es	¿En qué país se encuentra el lago Limerick?	lago Limerick, país
									it	In quale stato si trova il lago Limerick?	lago Limerick, stato
									fr	Dans quel pays se trouve le lac Limerick?	pays, lac Limerick
									nl	In welk land ligt Limerick Lake?	Limerick Lake, land
									hi_IN	लिमरिक झील किस देश में है?	लिमरिक झील, देश
			45	resource	true	true	false		en	What was the last movie with Alec Guinness?	Alec Guinness, last, movie		SELECT DISTINCT ?uri WHERE { ?uri <http://www.w3.org/1999/02/22-rdf-syntax-ns#type> <http://dbpedia.org/ontology/Film> . ?uri <http://dbpedia.org/ontology/starring> <http://dbpedia.org/resource/Alec_Guinness> . ?uri <http://dbpedia.org/ontology/releaseDate> ?date . } ORDER BY DESC(?date) LIMIT 1			uri							uri	http://dbpedia.org/resource/Kafka_(film)
									pt_BR	Qual foi o último filme de Alec Guinness?	último, filme, Alec Guinness
									fa	آخرین فیلم الک گینس چه بود؟	آخرین، فیلم، الک گینس
									de	Was war der letzte Film mit Alec Guinness?	Alec Guinness, letzter, Film
									es	¿Cuál fue la última película con Alec Guinness?	última película, Alec Guinness
									it	Qual è l'ultimo film con Alec Guinness?	Alec Guinness, ultimo film
									fr	Quel est le dernier film d'Alec Guinness?	Alec Guiness, dernier film
									nl	Wat was de laatste film met Alec Guinness?	Alec Guinness, laatste, film
									hi_IN	एलेक गिनीज की आखिरी फिल्म क्या थी?	एलेक गिनीज, आखिरी फिल्म
									ro	Care a fost ultimul film cu Alec Guinness?	Alec Guinness, ultim, film
			46	resource	true	true	false		en	What is the highest mountain in Australia?	Australia, highest mountain		PREFIX dbo: <http://dbpedia.org/ontology/> PREFIX res: <http://dbpedia.org/resource/> PREFIX rdf: <http://www.w3.org/1999/02/22-rdf-syntax-ns#> SELECT DISTINCT ?uri WHERE { ?uri rdf:type dbo:Mountain . ?uri dbo:locatedInArea res:Australia . ?uri dbo:elevation ?elevation . } ORDER BY DESC(?elevation) LIMIT 1			uri							uri	http://dbpedia.org/resource/Mawson_Peak
									pt_BR	Qual a montanha mais alta da Austrália?	montanha mais alta, Austrália
									de	Was ist der höchste Berg in Australien?	Australien, höchster Berg
									es	¿Cuál es la montaña más alta de Australia?	Australia, montaña más alta
									it	Qual è la montagna più alta d'Australia?	Australia, montagna più alta
									fr	Quelle est la plus haute montagne d'Australie?	plus haute montagne, Australie
									nl	Wat is de hoogste berg van Australië?	Australië, hoogste berg
									hi_IN	ऑस्ट्रेलिया में सर्वोच्च पर्वत कोनसा है?	ऑस्ट्रेलिया, सर्वोच्च पर्वत
			47	boolean	true	true	false		en	Is Frank Herbert still alive?	Frank Herbert, alive		PREFIX dbo: <http://dbpedia.org/ontology/> PREFIX res: <http://dbpedia.org/resource/> ASK WHERE { OPTIONAL { res:Frank_Herbert dbo:deathDate ?date . } FILTER (!BOUND(?date)) }																					false
									pt_BR	Frank Herbert ainda vive?	Frank Herbert, vive
									de	Lebt Frank Herbert noch?	Frank Herbert, leben
									es	¿Todavía vive Frank Herbert?	Frank Herbert, vive
									it	Frank Herbert è ancora vivo?	Frank Herbert, vivente
									fr	Frank Herbert est-il encore en vie?	Frank Herbert, en vie
									nl	Leeft Frank Herbert nog?	Frank Herbert, leeft
									hi_IN	क्या फ्रैंक हरबर्ट अभी भी जीवित है?	फ्रैंक हरबर्ट, जीवित
			48	resource	false	true	false		en	Who created Family Guy?	create, Family Guy		SELECT DISTINCT ?uri WHERE { <http://dbpedia.org/resource/Family_Guy> <http://dbpedia.org/ontology/creator> ?uri . }			uri							uri	http://dbpedia.org/resource/Seth_MacFarlane
									pt_BR	Quem criou Family Guy?	criou, Family Guy
									fa	چه کسی مرد خانواده را ساخته است؟	مرد خانواده، ساخته
									de	Wer hat sich Family Guy ausgedacht?	Family Guy, Erschaffer
									es	¿Quién creó Family Guy?	creador, Family Guy
									it	Chi ha creato I Griffin?	creare, I Griffin
									fr	Qui est le créateur de Family Guy?	créateur, Family Guy?
									nl	Wie heeft Family Guy bedacht?	Family Guy, schepper
									hi_IN	फॅमिली गाए कौन ने बनाया है?	फॅमिली गाए, बनाया
									ro	Cine a creat Family Guy?	creat, Family Guy
			49	resource	false	true	false		en	What is the official language of Suriname?	Suriname, official language		PREFIX dbo: <http://dbpedia.org/ontology/> PREFIX res: <http://dbpedia.org/resource/> SELECT DISTINCT ?uri WHERE { res:Suriname dbo:officialLanguage ?uri . }			uri							uri	http://dbpedia.org/resource/Dutch_language
									pt_BR	Qual a língua oficial do Suriname?	língua oficial, Suriname
									de	Was ist die Amtssprache Von Surinam?	Surinam, Amtssprache
									es	¿Cuál es la idioma oficial de Surinam?	Surinam, idioma oficial
									it	Qual è la lingua ufficiale del Suriname?	Suriname, lingua ufficiale
									fr	Quelle est la langue officielle du Suriname?	Suriname, langue officielle
									nl	Wat is de officiële taal van Suriname?	Suriname, officiële taal
									hi_IN	सूरीनाम की आधिकारिक भाषा क्या है?	सूरीनाम, आधिकारिक भाषा
									ro	Care este limba oficială din Suriname?	Suriname, limba oficială
			50	resource	false	true	false		en	Who wrote the song Hotel California?	write, song, Hotel California		SELECT DISTINCT ?uri WHERE { <http://dbpedia.org/resource/Hotel_California> <http://dbpedia.org/ontology/writer> ?uri . }			uri							uri	http://dbpedia.org/resource/Don_Felder
									pt_BR	Quem escreveu a canção Hotel California?	autor												uri	http://dbpedia.org/resource/Glenn_Frey
									fa	چه کسی آهنگ هتل کالیفرنیا را نوشت؟	اهنگ هتل کالیفرنیا، نوشت												uri	http://dbpedia.org/resource/Don_Henley
									de	Wer hat das Lied Hotel California geschrieben?	Lied, Hotel California, geschrieben
									es	¿Quién escribió la canción Hotel California?	autor, canción Hotel California
									it	Chi ha scritto la canzone Hotel California?	scrivere, canzone, Hotel California
									fr	Qui a composé la chanson Hotel California?	compositeur, Hotel California, chanson
									nl	Wie schreef het lied Hotel California?	lied, Hotel California, schrijver
									hi_IN	गीत होटल कैलिफोर्निया कोंन ने लिखा था?	गीत होटल कैलिफोर्निया, लिखा
									ro	Cine a compus cântecul Hotel California?	scrie, cântec, Hotel California
			51	resource	false	true	false		en	Give me all actors starring in movies directed by William Shatner.	actor, starring, movie, direct, William Shatner		SELECT DISTINCT ?uri WHERE { ?x <http://dbpedia.org/ontology/director> <http://dbpedia.org/resource/William_Shatner> . ?x <http://dbpedia.org/ontology/starring> ?uri . }			uri							uri	http://dbpedia.org/resource/Tom_Towles
									pt_BR	Liste todos os atores que estrelaram em filmes dirigidos por William Shatner.	atores, files, diretor, William Shatner												uri	http://dbpedia.org/resource/William_Shatner
									fa	تمام بازیگرانی که در فیلم های کارگردانی شده توسط ویلیام شاتنر بازی کرده اند را لیست کن.	بازیگرانی، فیلم های، کارگردانی شده، ویلیام شاتنر، بازی کرده اند												uri	http://dbpedia.org/resource/Brenda_Bakke
									de	Gib mir alle Schauspieler von Filmen, in denen William Shatner Regie geführt hat.	Schauspieler, Film, Regie, William Shatner												uri	http://dbpedia.org/resource/John_Prosky
									es	Dame todos los actores de películas dirigidas por William Shatner.	actor, película, director, William Shatner												uri	http://dbpedia.org/resource/Dan_Martin_(actor)
									it	Dammi tutti gli attori che recitano in film diretti da William Shatner.	attore, recitare, film, diretto, William Shatner												uri	http://dbpedia.org/resource/Duane_Whitaker
									fr	Donnes-moi tous les acteurs qui ont joué dans des films réalisés par Williams Shatner.	acteur, film, réalisé, William Shatner												uri	http://dbpedia.org/resource/J.T._Colosa
									nl	Geef alle acteurs van films waar William Shatner de regie van voerde.	acteur, film, regisseur, William Shatner												uri	http://dbpedia.org/resource/Chuck_Williams_(actor)
									hi_IN	विलियम शेटनेर द्वारा निर्देशित फिल्मों में सभी कलाकारों की सूचि दे।	विलियम शेटनेर, निर्देशित फिल्म, कलाकार												uri	http://dbpedia.org/resource/Dick_Van_Patten
									ro	Dă-mi toți actorii care joacă roluri principale în filme regizate de William Shatner.	actor, rol principal, film, regiza, William Shatner												uri	http://dbpedia.org/resource/Dan_Gauthier
																							uri	http://dbpedia.org/resource/Amy_Acker
																							uri	http://dbpedia.org/resource/Rickey_Medlocke
			52	resource	false	true	false		en	What is in a chocolate chip cookie?	ingredients, chocolate chip cookie		SELECT DISTINCT ?uri WHERE { <http://dbpedia.org/resource/Chocolate_chip_cookie> <http://dbpedia.org/ontology/ingredient> ?uri . }			uri							uri	http://dbpedia.org/resource/Chocolate_chip
									pt_BR	Quais são os ingredientes do biscoito de chocolate?	ingredientes, Chocolate Chip Cookie												uri	http://dbpedia.org/resource/Egg_(food)
									fa	چه چیزهایی در یک کیک شکلاتی هست؟	کیک شکلاتی												uri	http://dbpedia.org/resource/Butter
									de	Was ist in Chocolate Chip Cookies drin?	Zutaten, Chocolate Chip Cookie												uri	http://dbpedia.org/resource/Shortening
									es	¿Qué contiene una galleta de chocolate?	ingredientes, galleta de chocolate												uri	http://dbpedia.org/resource/Sodium_bicarbonate
									it	Cosa c'e' in un biscotto con gocce di cioccolato?	ingredienti, biscotto con gocce di cioccolato												uri	http://dbpedia.org/resource/Flour
									fr	Quels sont les ingrédients d'un cookie au chocolat	ingrédients, cookie au chocolat												uri	http://dbpedia.org/resource/Salt
									nl	Wat heb je nodig voor chocolate chip cookies?	ingrediënten, chocolate chip cookie												uri	http://dbpedia.org/resource/Brown_sugar
									hi_IN	चॉकलेट चिप कुकी में क्या है?	चॉकलेट चिप कुकी, सामग्री												uri	http://dbpedia.org/resource/Vanilla
									ro	Ce conține un biscuit cu fulgi de ciocolată?	ingrediente, biscuit cu fulgi de ciocolată												uri	http://dbpedia.org/resource/Sugar
			53	resource	false	false	false		en	Give me all professional skateboarders from Sweden.	professional, skateboarder, Sweden		PREFIX dbo: <http://dbpedia.org/ontology/> PREFIX dbp: <http://dbpedia.org/property/> PREFIX res: <http://dbpedia.org/resource/> SELECT DISTINCT ?uri WHERE { ?uri dbo:occupation res:Skateboarding . { ?uri dbo:birthPlace res:Sweden . } UNION { ?uri dbo:birthPlace ?place . ?place dbo:country res:Sweden . } }			uri							uri	http://dbpedia.org/resource/Ali_Boulala
									pt_BR	Liste todos os skatistas profissionais da Suécia.	skatista, profissionais, Suécia												uri	http://dbpedia.org/resource/Tony_Magnusson
									de	Gib mir alle Profiskateboarder aus Schweden.	Profiskateboarder, Schweden
									es	Dame todos las skateboarders profesionales de Suecia.	skateboarder profesional, Suecia
									it	Dammi tutti gli skateboarders professionisti di Svezia.	skateboarders professionisti, Svezia
									fr	Donne-moi tous les skateboarders professionnels de Suède.	skateboarders professionnels, Suède
									nl	Noem alle professionele skateboarders uit Zweden.	skateboarder, professioneel, Zweden
									hi_IN	मुझे स्वीडन से सभी पेशेवर स्केटबोर्डर की सूचि दो।	स्वीडन, पेशेवर स्केटबोर्डर, सूचि
			54	resource	false	true	false		en	Which ingredients do I need for carrot cake?	carrot cake, ingredients		SELECT DISTINCT ?uri WHERE { <http://dbpedia.org/resource/Carrot_cake> <http://dbpedia.org/ontology/ingredient> ?uri . }			uri							uri	http://dbpedia.org/resource/Almond
									pt_BR	Que ingredientes eu preciso para um bolo de cenoura?	ingredientes, bolo de cenoura												uri	http://dbpedia.org/resource/Carrot
									fa	چه مواد اولیه ای را من برای کیک هویج نیاز دارم؟	مواد اولیه ای، کیک هویج												uri	http://dbpedia.org/resource/Egg_(food)
									de	Welche Zutaten brauche ich für Möhrenkuchen?	Möhrenkuchen, Zutaten												uri	http://dbpedia.org/resource/Flour
									es	¿Qué ingredientes son necesarios para una tarta de zanahorias?	ingredientes, tarta de zanahorias?												uri	http://dbpedia.org/resource/Baking_powder
									it	Di quali ingredienti ho bisogno per la torta di carote?	ingredienti, torta di carote												uri	http://dbpedia.org/resource/Sugar
									fr	Quels sont les ingrédients du gateau aux carottes?	ingrédients, gateau aux carottes
									nl	Welke ingrediënten heb ik nodig voor worteltaart?	worteltaart, ingrediënten
									hi_IN	गाजर केक के लिए मुझे कौन से सामग्री की आवश्यकता है?	गाजर केक, सामग्री
									ro	De ce ingrediente am nevoie pentru tort de morcovi?	tort de morcovi, ingrediente
			55	resource	false	true	false		en	Does Neymar play for Real Madrid?	Neymar, play, Real Madrid		ASK WHERE { <http://dbpedia.org/resource/Neymar> <http://dbpedia.org/ontology/team> <http://dbpedia.org/resource/Real_Madrid_C.F.> . }			uri							uri	false
									pt_BR	O Neymar joga no Real Madrid?	Neymar, joga, Real Madrid
									fa	آیا نیمار برای رئال مادرید بازی می کند؟	نیمار، رئال مادرید، بازی
									de	Spielt Neymar für Real Madrid?	Neymar, spielen für, Real Madrid
									es	¿juega Neymar en el Real Madrid?	Neymar, jugador, Real Madrid
									it	Neymar gioca per il Real Madrid?	Neymar, giocare, Real Madrid
									fr	Est-ce que Neymar joue pour Madrid?	Neymar, joueur, Madrid
									nl	Speelt Neymar bij Real Madrid?	Neymar, spelen bij, Real Madrid
									hi_IN	क्या नेयमार रियल मैड्रिड के लिए खेलते हैं?	नेयमार, रियल मैड्रिड, खेलते
									ro	Neymar joacă pentru Real Madrid?	Neymar, joacă, Real Madrid
			56	resource	false	true	false		en	Which computer scientist won an oscar?	computer scientist, win, oscar		SELECT DISTINCT ?uri WHERE { { ?uri <http://dbpedia.org/ontology/field> <http://dbpedia.org/resource/Computer_science> . } UNION { ?uri <http://purl.org/dc/elements/1.1/description> ?s . FILTER regex(?s,'computer scientist','i') } ?uri <http://dbpedia.org/ontology/award> <http://dbpedia.org/resource/Academy_Awards> . }			uri							uri	http://dbpedia.org/resource/Edwin_Catmull
									pt_BR	Que cientista da computação ganhou um Oscar?	cientista da computação, ganhou, Oscar
									fa	کدام دانشمند کامپیوتر اسکار برده است؟	دانشمند کامپیوتر، اسکار
									de	Welcher Informatiker hat einen Oscar gewonnen?	Informatiker, Oscar, gewonnen
									es	¿Qué ingeniero informático ganó un Oscar?	ingeniero informático, ganó, Oscar
									it	Quale informatico ha vinto un Oscar?	informatico, vincere, Oscar
									fr	Quel informaticien a gagné un Oscar?	informaticient, gagné, Oscar
									nl	Welke informaticus won een Oscar?	informaticus, winnen, Oscar
									hi_IN	किस कंप्यूटर वैज्ञानिक ने ऑस्कर जीता?	कंप्यूटर वैज्ञानिक, ऑस्कर, जीत
									ro	Care informatician a câștigat un Oscar?	informatician, câștigat, Oscar
			57	number	true	true	false		en	How many companies were founded in the same year as Google?	companies, founded, same year, Google		SELECT (COUNT(DISTINCT ?uri) as ?c) WHERE { ?uri <http://www.w3.org/1999/02/22-rdf-syntax-ns#type> <http://dbpedia.org/ontology/Company> . ?uri <http://dbpedia.org/ontology/foundingYear> ?year . <http://dbpedia.org/resource/Google> <http://dbpedia.org/ontology/foundingYear> ?year . }			c										literal	0
									pt_BR	Quantas empresas foram fundadas no mesmo ano que o Google?	empresas, fundadas, mesmo ano, Google
									fa	چه تعداد شرکت در سال یکسانی با گوگل تأسیس شدند؟	شرکت، سال یکسانی، گوگل، تأسیس
									de	Wieviele Firmen wurden im selben Jahr wie Google gegründet?	Firmen, gegründet, selbes Jahr, Google
									es	¿Cuántas compañías fueron fundadas en el mismo año que Google?	compañías, fundadas, mismo año Google
									it	Quante società sono state fondate nello stesso anno di Google?	società, fondate, stesso anno, Google
									fr	Combien de companies ont été fondées la même année que Google?	nombre, companies, fondées, même année, Google
									nl	Hoeveel bedrijven werden opgericht in hetzelfde jaar als Google?	bedrijven, opgericht, hetzelfde jaar, Google
									hi_IN	कितनी कंपनियां स्थापित की गईं जिस वर्ष में गूगल हुइ?	कंपनिया, वर्ष, गूगल, स्थापित
									ro	Câte companii au fost înființate în același an cu Google?	companii, înființate, același an, Google
			58	resource	false	true	false		en	In which UK city are the headquarters of the MI6?	MI6, headquarters, city, UK		PREFIX res: <http://dbpedia.org/resource/> PREFIX dbo: <http://dbpedia.org/ontology/> PREFIX rdf: <http://www.w3.org/1999/02/22-rdf-syntax-ns#> SELECT DISTINCT ?uri WHERE { res:Secret_Intelligence_Service dbo:headquarter ?uri . ?uri dbo:country res:United_Kingdom . }			uri							uri	http://dbpedia.org/resource/London
									pt_BR	Em que cidade da Inglaterra está a sede do MI6?	cidade, Inglaterra, sede, MI6
									de	In welcher Stadt im Vereinigten Königreich ist das Hauptquartier des MI6?	MI6, Hauptquartier, Stadt, Vereinigtes Königreich
									es	¿En qué ciudad del reino unido se encuentra el cuartel genetal del MI6?	MI6, cuartel general, ciudad, reino unido
									it	In quale città del Regno Unito si trova il quartier generale del MI6?	MI6, quartier generale, città, Regno Unito
									fr	Dans quelle ville anglaise se trouvent les quartiers genéraux du MI6?	ville anglaise, quartiers genéraux, MI6
									nl	In welke Britse stad is het hoofdkwartier van MI6 gevestigd?	MI6, hoofdkwartier, Britse stad
									hi_IN	किस यूके शहर में एमआई-6 का मुख्यालय है?	यूके, शहर, एमआई-6, मुख्यालय
									ro	În care oraș din Regatul Unit se află cartierul general al MI6?	MI6, cartier general, oraș, Regatul Unit
			59	boolean	true	true	false		en	Was the Cuban Missile Crisis earlier than the Bay of Pigs Invasion?	Cuban Missile Crisis, earlier, Bay of Pigs Invasion		PREFIX dbo: <http://dbpedia.org/ontology/> PREFIX res: <http://dbpedia.org/resource/> ASK WHERE { res:Cuban_Missile_Crisis dbo:date ?x . res:Bay_of_Pigs_Invasion dbo:date ?y . FILTER (?x < ?y) }																					false
									pt_BR	A Crise dos Mísseis de Cuba ocorreu antes da Invasão da Baía dos Porcos?	Crise dos Mísseis de Cuba, antes, Invasão da Baía dos Porcos
									de	War die Kubakrise vor der Schweinebuchtinvasion?	Kubakrise, vor, Schweinebuchtinvasion
									es	¿Fué la crisis de cuba antes de la invasión de bahía de cochinos?	crísis de cuba, anterior a la invasión de bahía de cochinos?
									it	La crisi dei missili di Cuba avvenne prima dello sbarco nella Baia dei Porci?	Crisi dei missili di Cuba, precedente, sbarco nella Baia dei Porci
									fr	La crise des missiles de Cuba a-t-elle eu lieu avant the débarquement de la baie des Cochons?	Débarquement de la baie des Cochons, crise des missiles de Cuba
									nl	Was de Cubacrisis eerder dan de invasie in de Varkensbaai?	Cubacrisis, eerder dan, invasie in de Varkensbaai
									hi_IN	क्या क्यूबाई मिसाइल संकट बे ऑफ़ पिग्स आक्रमण के पहले हुआ था?	क्यूबाई मिसाइल संकट, बे ऑफ़ पिग्स आक्रमण, पहले हुआ
			60	resource	false	true	false		en	What does IYCM stand for?	IYCM, stand for		PREFIX dbo: <http://dbpedia.org/ontology/> PREFIX res: <http://dbpedia.org/resource/> SELECT DISTINCT ?uri WHERE { ?uri dbo:abbreviation 'IYCM' . }			uri							uri	http://dbpedia.org/resource/Youth_Climate_Movement
									pt_BR	Qual o significado de IYCM?	significado, IYCM
									de	Wofür steht IYCM?	IYCM, stehen für
									es	¿Qué abrevia IYCM?	IYCM, abreviación
									it	Che cosa significa IYCM?	IYCM, significato
									fr	Que veut dire IYCM?	IYCM, signification
									nl	Waarvoor staat de afkorting IYCM?	IYCM, staat voor
									hi_IN	आईसीवायएम् का पूर्ण प्रपत्र क्या है?	आईसीवायएम, पूर्ण प्रपत्र
									ro	Ce înseamnă IYCM?	IYCM, înseamnă
			61	date	false	true	false		en	When did the Ming dynasty dissolve?	dissolve, Ming dynasty		PREFIX res: <http://dbpedia.org/resource/> PREFIX dbo: <http://dbpedia.org/ontology/> SELECT DISTINCT ?date WHERE { res:Ming_dynasty dbo:dissolutionDate ?date . }			date				literal	1644-04-25
									pt_BR	Quando a Dinastia Ming acabou?	Dinastia Ming, acabou
									de	Wann endete die Ming-Dynastie?	Ende, Ming-Dynastie
									es	¿Cuándo se disolvió la dinastía de Ming?	disolvió, dinastía de Ming
									it	Quando è scomparsa la dinastia Ming?	anno scomparsa, dinastia Ming
									fr	Quand la dynastie Ming s'est-elle dissoute?	dissoudre, dynastie Ming
									nl	Wanneer werd de Ming-dynastie beëindigd?	Ming-dynastie, beëindigd
									hi_IN	मिंग राजवंश को कब भंग किया?	मिंग राजवंश, भंग
									ro	Când a dispărut dinastia Ming?	dispărut, dinastia Ming
			62	resource	false	true	false		en	List all episodes of the first season of the HBO television series The Sopranos!	HBO, television series, Sopranos, first season, episode		PREFIX dbo: <http://dbpedia.org/ontology/> PREFIX res: <http://dbpedia.org/resource/> SELECT DISTINCT ?uri WHERE { ?uri dbo:series res:The_Sopranos . ?uri dbo:seasonNumber 1 . }			uri							uri	http://dbpedia.org/resource/Isabella_(The_Sopranos)
									pt_BR	Liste todos os episódios da primeira temporada do seriado Família Soprano da HBO.	episódio, primeira temporada, seriado, Família Soprano, HBO												uri	http://dbpedia.org/resource/Meadowlands_(The_Sopranos)
									de	Liste alle Episoden der ersten Staffel der HBO-Fernsehserie Die Sopranos auf.	HBO-Fernsehserie, Sopranos, erste Staffel, Episode												uri	http://dbpedia.org/resource/The_Legend_of_Tennessee_Moltisanti
									es	Dame todos los episodios de la prímera época de la serie de HBO Los Sporanos.	serie televisiva de HBO, Los Sopranos, primera época, episodios												uri	http://dbpedia.org/resource/I_Dream_of_Jeannie_Cusamano
									it	Elenca tutti gli episodi della prima stagione della serie televisiva di HBO i Sopranos!	serie televisiva di HBO, i Sopranos, prima stagione, episodio												uri	http://dbpedia.org/resource/Boca_(The_Sopranos)
									fr	Donnes-moi tous les épisodes de la première saison de la série télévisée de HBO les Sopranos.	épisodes de la première saison, HBO, les Sopranos												uri	http://dbpedia.org/resource/Nobody_Knows_Anything
									nl	Noem alle afleveringen van het eerste seizoen van de HBO-serie The Sopranos.	HBO-serie, The Sopranos, eerste seizoen, aflevering												uri	http://dbpedia.org/resource/Pax_Soprana
									hi_IN	एचबीओ टेलीविजन श्रृंखला द सोप्रानोस! के पहले सीज़न के सभी एपिसोड की सूची बनाएं ।	एचबीओ, टेलीविजन श्रृंखला, द सोप्रानोस!, पहले सीज़न, सभी एपिसोड												uri	http://dbpedia.org/resource/A_Hit_Is_a_Hit
																							uri	http://dbpedia.org/resource/Denial,_Anger,_Acceptance
																							uri	http://dbpedia.org/resource/College_(The_Sopranos)
																							uri	http://dbpedia.org/resource/46_Long
																							uri	http://dbpedia.org/resource/The_Sopranos_(episode)
																							uri	http://dbpedia.org/resource/Down_Neck
			63	number	false	true	false		en	What is the total population of Melbourne, Florida?	total population, Melbourne Florida		PREFIX dbo: <http://dbpedia.org/ontology/> SELECT ?uri WHERE { <http://dbpedia.org/resource/Melbourne,_Florida> dbo:populationTotal ?uri . }			c										literal	76068
									pt_BR	Qual é a população total de Melbourne, Florida?	população total, Melbourne, Florida
									de	Was ist die Gesamteinwohnerzahl von Melbourne, Florida?	Gesamteinwohnerzahl, Melbourne Florida
									es	¿Cuál es la población total de Melbourne, Florida?	población total, Melbourne Florida
									it	Qual è la popolazione totale di Melbourne, Florida?	popolazione totale, Melbourne, Florida
									fr	Quelle est la population totale de Melbourne, Floride?	population totale, Melbourne, Floride
									nl	Wat is de bevolking van Melbourne, Florida?	bevolking, Melbourne Florida
									hi_IN	मेलबोर्न, फ्लोरिडा की कुल आबादी क्या है?	मेलबोर्न, फ्लोरिडा, कुल आबादी
									ro	Care este populația totală a Melbourne, Florida?	populația totală, Melbourne Florida
			64	boolean	false	true	false		en	Did Arnold Schwarzenegger attend a university?	Arnold Schwarzenegger, attend, university		PREFIX dbo: <http://dbpedia.org/ontology/> PREFIX res: <http://dbpedia.org/resource/> PREFIX rdf: <http://www.w3.org/1999/02/22-rdf-syntax-ns#> ASK WHERE { res:Arnold_Schwarzenegger dbo:almaMater ?x . ?x rdf:type dbo:University . }																					true
									pt_BR	Arnold Schwarzenegger frequentou uma universidade?	Arnold Schwarzenegger, frequentou, universidade
									de	Hat Arnold Schwarzenegger eine Universität besucht?	Arnold Schwarzenegger, Universität, besucht
									es	¿Fue Arnold Schwarzenegger a la universidad?	Arnold Schwarzenegger, universidad
									it	Arnold Schwarzenegger ha frequentato l'Università?	Arnold Schwarzenegger, frequentare, Università
									fr	Est-ce que Arnold Schwarzenegger a étudié à une université?	Arnold Schwarzenegger, etudié, université
									nl	Had Arnold Schwarzenegger aan een universiteit gestudeerd?	Arnold Schwarzenegger, universiteit, gestudeerd
									hi_IN	क्या अर्नोल्ड श्वार्ज़नेगर विश्वविद्यालय गए थे?	अर्नोल्ड श्वार्ज़नेगर, विश्वविद्यालय
									ro	Arnold Schwarzenegger a frecventat o universitate?	Arnold Schwarzenegger, frecventa, universitate
			65	resource	false	true	false		en	What country is Mount Everest in?	country, Mount Everest		PREFIX dbo: <http://dbpedia.org/ontology/> PREFIX res: <http://dbpedia.org/resource/> PREFIX rdf: <http://www.w3.org/1999/02/22-rdf-syntax-ns#> SELECT DISTINCT ?uri WHERE { res:Mount_Everest dbo:locatedInArea ?uri . ?uri rdf:type dbo:Country . }			uri							uri	http://dbpedia.org/resource/China
									pt_BR	Em que país está o Monte Everest?	país, Monte Everest												uri	http://dbpedia.org/resource/Nepal
									de	In welchem Land ist der Mount Everest?	Land, Mount Everest
									es	¿En que país esta el monte Everest?	país, monte Everest
									it	In quale stato si trova il Monte Everest?	stato, Monte Everest
									fr	Dans quel pays se trouve le mont Everest?	pays, Everest
									nl	In welke land is de Mount Everest?	land, Mount Everest
									hi_IN	कोनसे देश में माउंट एवरेस्ट है?	देश, माउंट एवरेस्ट
									ro	În ce țară se află muntele Everest?	țară, muntele Everest
			66	resource	false	true	false		en	What is the largest city in Australia?	Australia, largest city		PREFIX dbo: <http://dbpedia.org/ontology/> PREFIX res: <http://dbpedia.org/resource/> SELECT DISTINCT ?uri WHERE { res:Australia dbo:largestCity ?uri . }			uri							uri	http://dbpedia.org/resource/Sydney
									pt_BR	Qual é a maior cidade da Austrália?	maior cidade, Austrália
									de	Was ist die größte Stadt in Australien?	Australien, größte Stadt
									es	¿Cuál es la cuidad más grande de Australia?	Australia, ciudad más grande
									it	Qual è la città più grande d'Australia?	Australia, città più grande
									fr	Quelle est la plus grande ville d'Australie?	plus grande ville, Australie
									nl	Wat is de grootste stad van Australië?	grootste stad, Australië
									hi_IN	ऑस्ट्रेलिया में सबसे बड़ा शहर क्या है?	ऑस्ट्रेलिया, सबसे बड़ा शहर
			67	list	false	true	false		en	Give me all launch pads operated by NASA.	launch pad, operate, NASA		PREFIX dbo: <http://dbpedia.org/ontology/> PREFIX res: <http://dbpedia.org/resource/> PREFIX rdf: <http://www.w3.org/1999/02/22-rdf-syntax-ns#> SELECT DISTINCT ?uri WHERE { ?uri rdf:type dbo:LaunchPad . ?uri dbo:operator res:NASA . }			list																list	http://dbpedia.org/resource/Mid-Atlantic_Regional_Spaceport_Launch_Pad_0
									pt_BR	Ache todas as plataformas de lançamento espaciais operadas pela NASA.	plataforma de lançamento, operadas, NASA																					list	http://dbpedia.org/resource/Keweenaw_Rocket_Range
									de	Gib mir alle von der NASA betriebenen Startrampen.	Startrampe, betreiben, NASA																					list	http://dbpedia.org/resource/Spaceport_Florida_Launch_Complex_36
									es	Dame todas las plataformas de lanzamiento operadas por la NASA.	plataforma de lanzamiento, operada por la NASA																					list	http://dbpedia.org/resource/Wallops_Flight_Facility_Launch_Area_3
									it	Dammi tutte le rampe di lancio gestite dalla NASA.	rampa di lancio, gestire, NASA																					list	http://dbpedia.org/resource/Broglio_Space_Centre
									fr	Donnes-moi toutes les rampes de lancements des Etats-unis.	rampes de lancements, Etats-unis																					list	http://dbpedia.org/resource/Kennedy_Space_Center_Launch_Complex_39
									nl	Noem alle lanceerplatformen van de NASA.	lanceerplatform, NASA																					list	http://dbpedia.org/resource/Cape_Canaveral_Air_Force_Station_Launch_Complex_13
									hi_IN	मुझे नासा द्वारा संचालित सभी लॉन्च पैड की सूचि दें।	नासा, संचालित, लॉन्च पैड
									ro	Dă-mi toate rampele de lansare operate de către NASA.	rampă de lansare, operat, NASA
			68	resource	false	true	false		en	Who is the mayor of Tel Aviv?	Tel Aviv, mayor		PREFIX dbo: <http://dbpedia.org/ontology/> PREFIX res: <http://dbpedia.org/resource/> SELECT DISTINCT ?uri WHERE { res:Tel_Aviv dbo:leaderName ?uri . }			uri							uri	http://dbpedia.org/resource/Ron_Huldai
									pt_BR	Quem é o prefeito de Tel Aviv?	prefeito, Tel Aviv
									de	Wer ist der Bürgermeister von Tel Aviv?	Tel Aviv, Bürgermeister
									es	¿Quién es el alcalde de Tel Aviv?	Tel Aviv, alcalde
									it	Chi è il sindaco di Tel Aviv?	Tel Aviv, sindaco
									fr	Qui est le maire de Tel Aviv?	Tel Aviv, maire
									nl	Wie is de burgemeester van Tel Aviv?	Tel Aviv, burgemeester
									hi_IN	तेल अवीव के महापौर कौन हैं?	तेल अवीव, महापौर
									ro	Cien este primarul din Tel Aviv?	Tel Aviv, primar
			69	resource	false	true	false		en	List all episodes of the first season of the HBO television series The Sopranos.	HBO, television series, Sopranos, first season, episode		PREFIX dbo: <http://dbpedia.org/ontology/> PREFIX res: <http://dbpedia.org/resource/> SELECT DISTINCT ?uri WHERE { ?uri dbo:series res:The_Sopranos . ?uri dbo:seasonNumber 1 . }			uri							uri	http://dbpedia.org/resource/Isabella_(The_Sopranos)
									pt_BR	Liste todos os episódios da primeira temporada do seriado Família Soprano da HBO.	episódio, primeira temporada, seriado, Família Soprano, HBO												uri	http://dbpedia.org/resource/Meadowlands_(The_Sopranos)
									de	Liste alle Episoden der ersten Staffel der HBO-Fernsehserie Die Sopranos auf.	HBO-Fernsehserie, Sopranos, erste Staffel, Episode												uri	http://dbpedia.org/resource/The_Legend_of_Tennessee_Moltisanti
									es	Dame todos los episodios de la prímera época de la serie de HBO Los Sporanos.	serie televisiva de HBO, Los Sopranos, primera época, episodios												uri	http://dbpedia.org/resource/I_Dream_of_Jeannie_Cusamano
									it	Elenca tutti gli episodi della prima stagione della serie televisiva di HBO i Sopranos.	serie televisiva di HBO, i Sopranos, prima stagione, episodio												uri	http://dbpedia.org/resource/Boca_(The_Sopranos)
									fr	Donnes-moi tous les épisodes de la première saison de la série télévisée de HBO les Sopranos.	épisodes de la première saison, HBO, les Sopranos												uri	http://dbpedia.org/resource/Nobody_Knows_Anything
									nl	Noem alle afleveringen van het eerste seizoen van de HBO-serie The Sopranos.	HBO-serie, The Sopranos, eerste seizoen, aflevering												uri	http://dbpedia.org/resource/Pax_Soprana
									hi_IN	एचओओ टेलीविजन श्रृंखला द सोप्रानोस के पहले सीज़न के सभी एपिसोड की सूची बनाएं। '	एचओओ टेलीविजन श्रृंखला, द सोप्रानोस, पहले सीज़न, एपिसोड												uri	http://dbpedia.org/resource/A_Hit_Is_a_Hit
									ro	Listează toate episodele din primul sezon al serialului HBO de televiziune The Sopranos	HBO, serial de televiziune, Sopranos, primul sezon, episod												uri	http://dbpedia.org/resource/Denial,_Anger,_Acceptance
																							uri	http://dbpedia.org/resource/College_(The_Sopranos)
																							uri	http://dbpedia.org/resource/46_Long
																							uri	http://dbpedia.org/resource/The_Sopranos_(episode)
																							uri	http://dbpedia.org/resource/Down_Neck
			70	resource	false	true	false		en	Who created Batman?	Batman, creator		SELECT DISTINCT ?uri WHERE { <http://dbpedia.org/resource/Batman> <http://dbpedia.org/ontology/creator> ?uri . }			uri							uri	http://dbpedia.org/resource/Bill_Finger
									pt_BR	Quem criou Batman?	criador, Batman												uri	http://dbpedia.org/resource/Bob_Kane
									fa	چه کسی بتمن را ساخت؟	بتمن، ساخت
									de	Wer hat Batman erfunden?	Batman, Erfinder
									es	¿Quién creó Batman?	creador, comic, Capitán América
									it	Chi ha creato Batman?	creatore, Batman
									fr	Qui a créé la bande dessinée Captain America?	bande dessinée, créer, Captain America
									nl	Door wie werd Batman bedacht?	bedenker, Batman
									hi_IN	किसने बैटमैन बनाया?	बैटमैन, निर्माता
									ro	Cine a creat Batman?	Batman, creat
			71	resource	false	true	false		en	Who played Gus Fring in Breaking Bad?	play, Gus Fring, Breaking Bad		SELECT DISTINCT ?uri WHERE { <http://dbpedia.org/resource/Gus_Fring> <http://dbpedia.org/ontology/portrayer> ?uri . }			uri							uri	http://dbpedia.org/resource/Giancarlo_Esposito
									pt_BR	Quem interpretou Gus Fring em Breaking Bad?	intérprete, Gus Fring, Breaking Bad
									fa	چه کسی گوستاوو فرینگ را در بریکینگ بد بازی کرد؟	گوستاوو فرینگ، بریکینگ بد، بازی
									de	Wer hat Gus Fring in Breaking Bad gespielt?	Gus Fring, Breaking Bad, Schauspieler
									es	¿Quién interpreto a Gus Fring en Breaking Bad?	actor, Gus Fring, Breaking Bad
									it	Chi ha interpretato Gustavo Fring in Breaking Bad - Reazioni collaterali?	interpretare, Gustavo Fring, Breaking Bad - Reazioni collaterali
									fr	Qui joua Gus Fring dans Breaking Bad?	acteur, Gus Fring, Breaking Bad
									nl	Wie speelt Gus Fring in Breaking Bad?	Gus Fring, acteur, Breaking Bad
									hi_IN	किसने गस फ्रिंग को ब्रेकिंग बैड में निभाया है ?	गस फ्रिंग, ब्रेकिंग बैड, निभाया, अभिनेता
									ro	Cine l-a jucat pe Gus Fring în Breaking Bad?	jucat, Gus Fring, Breaking Bad
			72	resource	false	true	false		en	In which programming language is GIMP written?	GIMP, programming language		PREFIX dbo: <http://dbpedia.org/ontology/> PREFIX res: <http://dbpedia.org/resource/> SELECT DISTINCT ?uri WHERE { res:GIMP dbo:programmingLanguage ?uri . }			uri							uri	http://dbpedia.org/resource/C_(programming_language)
									pt_BR	Em que linguagem de programação foi escrito o GIMP?	linguagem de programação, GIMP												uri	http://dbpedia.org/resource/GTK+
									de	In welcher Programmiersprache wurde GIMP geschrieben?	GIMP, Programmiersprache
									es	¿En qué lenguaje de programación esta programado GIMP?	GIMP, lenguaje de programación
									it	In quale linguaggio di programmazione è scritto GIMP?	GIMP, linguaggio di programmazione
									fr	En quel langage de programmation a été écrit GIMP?	langage de programmation, GIMP
									nl	In welke programmeertaal is GIMP geschreven?	GIMP, programmeertaal
									hi_IN	जीआईएमपी किस प्रोग्रामिंग भाषा में लिखी गई है?	जीआईएमपी, प्रोग्रामिंग भाषा
			73	resource	false	true	false		en	In which ancient empire could you pay with cocoa beans?	ancient empire, pay, cocoa beans		SELECT DISTINCT ?uri WHERE { ?uri <http://dbpedia.org/ontology/currency> <http://dbpedia.org/resource/Cocoa_bean> . }			uri							uri	http://dbpedia.org/resource/Aztec_Empire
									pt_BR	Em que império antigo você poderia pagar com grãos de cacau?	império antigo, pagar, grãos de cacau												uri	http://dbpedia.org/resource/Tabasco_(former_state)
									fa	در کدام امپراتوری باستانی می توان با دانه های کاکائو داد و ستد کرد؟	امپراتوری باستانی، دانه های کاکائو، داد و ستد
									de	In welchem alten Reich konnte man mit Kakaobohnen bezahlen?	altes Reich, bezahlen, Kakaobohnen
									es	En que imperio antiguo pagaría con granos de cacao?	imperio antiguo, pagar, granos cacao
									it	In quale antico impero era possibile pagare con le fave di cacao?	antico impero, pagare, fave di cacao
									fr	Dans quel empire ancien payait-on avec des fèves de cacao?	empire ancien, monnaie, fève de cacao
									nl	In welke oude imperium kon je met cacaobonen betalen?	oude imperium, betalen, cacaobonen
									hi_IN	किस प्राचीन साम्राज्य में आप कोको बीन से भुगतान कर सकते हैं?	प्राचीन साम्राज्य, कोको बीन, भुगतान
									ro	În ce imperiu antic puteai plăti cu boabe de cacao?	imperiu antic, plăti, boabe de cacao
			74	resource	false	true	false		en	Who is the editor of Forbes?	Forbes, editor		PREFIX res: <http://dbpedia.org/resource/> PREFIX dbo: <http://dbpedia.org/ontology/> SELECT DISTINCT ?uri WHERE { res:Forbes dbo:editor ?uri . }			uri							uri	http://dbpedia.org/resource/Steve_Forbes
									pt_BR	Quem é o editor da Forbes?	editor, Forbes
									de	Wer ist der Herausgeber von Forbes?	Forbes, Herausgeber
									es	¿Quién es el editor de Forbes?	Forbes, editor
									it	Chi è l'editore di Forbes?	Forbes, editore
									fr	Qui est le rédacteur en chef de Forbes?	Forbes, rédacteur en chef
									nl	Wie is de uitgever van Forbes.	Forbes, uitgever
									hi_IN	फोर्ब्स के संपादक कौन है?	फोर्ब्स, संपादक
									ro	Cine este editorul Forbes?	Forbes, editor
			75	number	false	true	false		en	How many people live in the capital of Australia?	Australia, capital, people, live		PREFIX dbo: <http://dbpedia.org/ontology/> PREFIX res: <http://dbpedia.org/resource/> SELECT DISTINCT ?num WHERE { res:Australia dbo:capital ?x . ?x dbo:populationTotal ?num . }			c										literal	381488
									pt_BR	Quantos habitantes tem a capital da Austrália?	habitantes, capital, Austrália
									de	Wieviele Menschen leben in der Hauptstadt Australiens?	Australien, Hauptstadt, Menschen, leben
									es	¿Cuánta gente vive en la capital de Australia?	Australia, capital, habitantes
									it	Quante persone vivono nella capitale dell'Australia?	Australia, capitale, abitanti
									fr	Quel est le nombre d'habitants de la capitale de l'Australie?	nombre d'habitants, capitale, Australie
									nl	Hoeveel mensen wonen er in de hoofdstad van Australië?	inwoners, hoofdstad van Australië
									hi_IN	कितने लोग ऑस्ट्रेलिया की राजधानी में रहते हैं?	ऑस्ट्रेलिया, राजधानी, आबादी
									ro	Câți oameni locuiesc in capitala Australiei?	Australia, captital, oameni, locui
			76	resource	false	true	false		en	Which professional surfers were born in Australia?	professional surfer, born, Australia		PREFIX dbo: <http://dbpedia.org/ontology/> PREFIX res: <http://dbpedia.org/resource/> SELECT DISTINCT ?uri WHERE { ?uri dbo:occupation res:Surfing . ?uri dbo:birthPlace res:Australia . }			uri							uri	http://dbpedia.org/resource/Ian_Cairns
									pt_BR	Quais surfistas profissionais nasceram na Austrália?	surfistas profissionais, nascer, Austrália												uri	http://dbpedia.org/resource/Midget_Farrelly
									de	Welche Profisurfer wurden in Australien geboren?	Profisurfer, geboren, Australien
									es	¿Qué surfistas profesionales nacieron en Australia?	surfista profesional, nacido, Australia
									it	Quali surfisti professionisti sono nati in Australia?	surfista professionista, nato, Australia
									fr	Quels surfeurs professionels sont nés en Australie?	surfeurs professionels, Australie
									nl	Welke professionele surfers werden geboren in Australië?	professionele surfer, Australië
									hi_IN	कौन से पेशेवर सर्फरस ऑस्ट्रेलिया में पैदा हुए थे?	पेशेवर सर्फरस, ऑस्ट्रेलिया, पैदा
									ro	Ce surferi profesioniști s-au născut în Australia?	surfer profesionist, născut, Australia
			77	resource	false	true	false		en	Which electronics companies were founded in Beijing?	electronics companies, founded, Beijing		SELECT DISTINCT ?uri WHERE { ?uri a <http://dbpedia.org/ontology/Company> . ?uri <http://dbpedia.org/ontology/industry> <http://dbpedia.org/resource/Electronics> . ?uri <http://dbpedia.org/ontology/foundationPlace> <http://dbpedia.org/resource/Beijing> . }			uri							uri	http://dbpedia.org/resource/Lenovo
									pt_BR	Que companhias de eletrônica foram fundadas em Beijing?	companhias de eletrônica, fundadas, Beijing
									fa	چه شرکت های الکترونیکی در پکن تأسیس شدند؟	شرکت های الکترونیکی، پکن، تأسیس
									de	Welche Elektronikunternehmen wurden in Peking gegründet?	Elektronikunternehmen, gegründet in, Peking
									es	¿Qué compañías de electrónica fueron fundadas en Pekín?	compañías de electrónica, fundadas, Pekín
									it	Quali società di elettronica sono state fondate a Pechino?	società di elettronica, fondate, Pechino
									fr	Quelles sont les companies d'électronique fondées à Beijing?	companies d'électronique, fondées, Beijing
									nl	Welke elektronica bedrijven zijn opgericht in Peking?	elektronica bedrijven, opgericht in, Peking
									hi_IN	बीजिंग में कौन से इलेक्ट्रॉनिक्स कंपनियां स्थापित की गई थीं?	बीजिंग, इलेक्ट्रॉनिक्स कंपनियां, स्थापित
									ro	Care companii de electronice au fost fondate în Beijing?	companii de electronice, fondat, Beijing
			78	resource	false	true	false		en	Give me all video games published by Mean Hamster Software.	video game, publish, Mean Hamster Software		PREFIX dbo: <http://dbpedia.org/ontology/> PREFIX res: <http://dbpedia.org/resource/> PREFIX rdf: <http://www.w3.org/1999/02/22-rdf-syntax-ns#> SELECT DISTINCT ?uri WHERE { ?uri rdf:type dbo:VideoGame . ?uri dbo:publisher res:Mean_Hamster_Software . }			uri							uri	http://dbpedia.org/resource/Crossbow_(video_game)
									pt_BR	Mostre todos os jogos da Mean Hamster Software.	Videospiel, Mean Hamster Software												uri	http://dbpedia.org/resource/Riven
									de	Gib mir alle Videospiele von Mean Hamster Software.	Videospiel, Mean Hamster Software
									es	Dame todos los videojuegos de Mean Hamster Software.	videojuego, Mean Hamster Software
									it	Dammi tutti i videogiochi di Mean Hamster Software.	videogioco, prodotto, Mean Hamster Software
									fr	Donnes-moi tous les jeux vidéos publiés par Mean Hamster Software.	jeux vidéos, publiés, Mean Hamster Software
									nl	Geef me alle videogames van Mean Hamster Software.	videogame, Mean Hamster Software
									hi_IN	मीन हम्सटर सॉफ्टवेयर द्वारा प्रकाशित सभी वीडियो गेम की सूचि दें। '	मीन हम्सटर सॉफ्टवेयर, प्रकाशित, वीडियो गेम
									ro	Dă-mi toate jocurile video publicate de Mean Hamster Software	joc video, publicat, Mean Hamster Software
			79	number	false	true	false		en	How many Aldi stores are there?	own, Aldi		SELECT DISTINCT ?number WHERE { <http://dbpedia.org/resource/Aldi> <http://dbpedia.org/ontology/numberOfLocations> ?number . }			c										literal	9600
									pt_BR	Quantas lojas Aldi existem?	lojas, Aldi
									fa	چه تعداد فروشگاه آلدی وجود دارد؟	فروشگاه، آلدی
									de	Wieviele Aldi-Filialen gibt es?	gehören, Aldi
									es	¿Cuántas tiendas Aldi hay?	pertenece, Aldi
									it	Quanti negozi Aldi ci sono?	possedere, Aldi
									fr	Combien de magasins Aldi sont là?	possède, Aldi
									nl	Hoeveel Aldi winkels zijn er?	eigenaar, Aldi
									hi_IN	आलड़ी के कितने स्टोर हैं?	आलड़ी, कितने स्टोर
									ro	Câte magazine Aldi există?	avea, Aldi
			80	resource	false	true	false		en	What is the capital of Cameroon?	capital, Cameroon		SELECT DISTINCT ?uri WHERE { <http://dbpedia.org/resource/Cameroon> <http://dbpedia.org/ontology/capital> ?uri. }			uri							uri	http://dbpedia.org/resource/Yaoundé
									pt_BR	Qual a capital de Camarões?	capital, Camarões
									fa	پایتخت کامرون کجاست؟	پایتخت، کامرون
									de	Was ist die Hauptstadt von Kamerun?	Hauptstadt, Kamerun
									es	¿Cuál es la capital de Camerún?	capital, Camerún
									it	Qual è la capitale del Cameroon	capitale, Cameroon
									fr	Quelle est la capitale du Cameroun?	capitale, Cameroun
									nl	Wat is de hoofdstad van Kameroen?	hoofdstad, Kameroen
									hi_IN	कैमरून की राजधानी क्या है?	कैमरून, राजधानी
									ro	Care este capitala Camerunului?	capitală, Camerun
			81	boolean	false	true	false		en	Is there a video game called Battle Chess?	video game, Battle Chess		PREFIX dbo: <http://dbpedia.org/ontology/> PREFIX rdf: <http://www.w3.org/1999/02/22-rdf-syntax-ns#> PREFIX rdfs: <http://www.w3.org/2000/01/rdf-schema#> ASK WHERE { ?uri rdf:type dbo:VideoGame . ?uri rdfs:label 'Battle Chess'@en . }																					true
									pt_BR	Há algum jogo eletrônico chamado Battle Chess?	jogo eletrônico, Battle Chess
									de	Gibt es ein Videospiel, das Battle Chess heißt?	Videospiel, Battle Chess
									es	¿Hay algún videojuego que se llame Battle Chess?	videojuego, Battle Chess
									it	Esiste un videogioco che si chiama Battle Chess?	videogioco, Battle Chess
									fr	Existe-t-il un jeu vidéo appelé Battle Chess?	jeu vidéo, Battle Chess
									nl	Bestaat er een videospel met de naam Battle Chess?	videospel, Battle Chess
									hi_IN	क्या बैटल चैस नामक वीडियो गेम है?	बैटल चैस, वीडियो गेम
			82	boolean	false	true	false		en	Was the wife of president Lincoln called Mary?	Lincoln, president, wife, called, Mary		PREFIX dbo: <http://dbpedia.org/ontology/> PREFIX res: <http://dbpedia.org/resource/> PREFIX rdfs: <http://www.w3.org/2000/01/rdf-schema#> ASK WHERE { res:Abraham_Lincoln dbo:spouse ?spouse . ?spouse rdfs:label ?name . FILTER(regex(?name,'Mary')) }																					true
									pt_BR	A esposa do Presidente Lincoln chamava-se Mary?	mulher, Presidente Lincoln, chamava, Mary
									de	Hieß die Frau von Präsident Lincoln Mary?	Lincoln, Präsident, Frau, heißen, Mary
									es	¿La mujer del presidente Lincoln se llama Mary?	mujer, presidente, Lincoln, se lamma, Mary
									it	La moglie del presidente Lincoln si chiamava Mary?	moglie, presidente, Lincoln, si chiama, Mary
									fr	Est-ce que l'épouse du président Lincoln s'appelait Mary?	épouse, Lincoln, Mary, appelle
									nl	Heette de echtgenote van president Lincoln Mary?	echtgenote, Lincoln, Mary
									hi_IN	क्या राष्ट्रपति लिंकन की पत्नी का नाम मैरी था?	राष्ट्रपति लिंकन, पत्नी, मैरी
									ro	Este soția președintelui Lincoln numită Mary?	Lincoln, președinte, soție, numită, Mary
			83	resource	false	true	false		en	Give me all movies directed by Francis Ford Coppola.	movie, direct, Francis Ford Coppola		SELECT DISTINCT ?uri WHERE { ?uri <http://www.w3.org/1999/02/22-rdf-syntax-ns#type> <http://dbpedia.org/ontology/Film> . ?uri <http://dbpedia.org/ontology/director> <http://dbpedia.org/resource/Francis_Ford_Coppola> . }			uri							uri	http://dbpedia.org/resource/The_Rain_People
									pt_BR	Encontre todos os filmes dirigidos por Francis Ford Coppola.	filmes, dirigido, Francis Ford Coppola												uri	http://dbpedia.org/resource/The_Godfather_Part_III
									fa	تمام فیلم های کارگردانی شده توسط فرانسیس فورد کوپولا را لیست کن.	فیلم، کارگردانی، فرانسیس فورد کوپولا												uri	http://dbpedia.org/resource/One_from_the_Heart
									de	Gib mir alle Filme, bei denen Francis Ford Coppola Regie geführt hat.	Film, Regie, Francis Ford Coppola												uri	http://dbpedia.org/resource/The_Outsiders_(film)
									es	Dame todas las películas que haya dirigido Francis Ford Coppola.	película, director, Francis Ford Coppola												uri	http://dbpedia.org/resource/The_Terror_(1963_film)
									it	Dammi tutti i film diretti da Francis Ford Coppola.	film, dirigere, Francis Ford Coppola												uri	http://dbpedia.org/resource/The_Godfather_Part_II
									fr	Donnes-moi tous les films dont Francis réalisés par Francis Ford Coppola.	film, directeur, Francis Ford Coppola												uri	http://dbpedia.org/resource/Twixt_(film)
									nl	Geef alle films die werden geregisseerd door Francis Ford Coppola.	films, regisseur, Francis Ford Coppola												uri	http://dbpedia.org/resource/The_Cotton_Club_(film)
									hi_IN	मुझे फ्रांसिस फोर्ड कोपोला द्वारा निर्देशित सभी फिल्मों की सूचि दे ।	फ्रांसिस फोर्ड कोपोला, निर्देशित, फिल्मों												uri	http://dbpedia.org/resource/Tonight_for_Sure
									ro	Dă-mi toate filmele regizate de Francis Ford Coppola.	film, regizat, Francis Ford Coppola												uri	http://dbpedia.org/resource/Peggy_Sue_Got_Married
																							uri	http://dbpedia.org/resource/Apocalypse_Now
																							uri	http://dbpedia.org/resource/The_Conversation
																							uri	http://dbpedia.org/resource/Apocalypse_Now_Redux
																							uri	http://dbpedia.org/resource/Bram_Stoker's_Dracula
																							uri	http://dbpedia.org/resource/Rumble_Fish
																							uri	http://dbpedia.org/resource/Hammett_(film)
																							uri	http://dbpedia.org/resource/The_Godfather
																							uri	http://dbpedia.org/resource/Youth_Without_Youth_(film)
																							uri	http://dbpedia.org/resource/Finian's_Rainbow_(film)
																							uri	http://dbpedia.org/resource/Dementia_13
																							uri	http://dbpedia.org/resource/Tucker:_The_Man_and_His_Dream
																							uri	http://dbpedia.org/resource/Gardens_of_Stone
																							uri	http://dbpedia.org/resource/The_Rainmaker_(1997_film)
																							uri	http://dbpedia.org/resource/You're_a_Big_Boy_Now
																							uri	http://dbpedia.org/resource/Tetro
																							uri	http://dbpedia.org/resource/New_York_Stories
																							uri	http://dbpedia.org/resource/The_Godfather_Saga
																							uri	http://dbpedia.org/resource/The_Godfather_(film_series)
																							uri	http://dbpedia.org/resource/Battle_Beyond_the_Sun
																							uri	http://dbpedia.org/resource/The_Bellboy_and_the_Playgirls
																							uri	http://dbpedia.org/resource/Captain_EO__Captain_EO__1
																							uri	http://dbpedia.org/resource/Jack_(1996_film)
			84	resource	true	true	false		en	Which of Tim Burton's films had the highest budget?	highest budget, film, Tim Burton		PREFIX dbo: <http://dbpedia.org/ontology/> PREFIX res: <http://dbpedia.org/resource/> SELECT DISTINCT ?uri WHERE { ?uri dbo:director res:Tim_Burton . ?uri dbo:budget ?b . } ORDER BY ?b OFFSET 0 LIMIT 1			uri							uri	http://dbpedia.org/resource/Big_Eyes
									pt_BR	Qual filme de Tim Burton teve o maior orçamento?	filme, Tim Burton, maior orçamento
									de	Welcher von Tim Burtons Filmen hatte das höchste Budget?	höchstes Budget, Film, Tim Burton
									es	¿Cuál es la película de Tim Burton con el mayor presupuesto?	película de Tim Burton, mayor presupuesto
									it	Quali film di Tim Burton hanno avuto il budget più alto?	budget più alto, film, Tim Burton
									fr	Quel film de Tim Burton a le budget le plus haut?	budget le plus haut, Tim Burton
									nl	Welke van Tim Burton's films had het hoogste budget?	film, Tim Burton, hoogste budget
									hi_IN	टिम बर्टन की फिल्मों में से कौन सी का सबसे ज्यादा बजट था?	टिम बर्टन, फिल्मो, सबसे ज्यादा बजट
									ro	Care dintre filmele lui Tom Burton a avut cel mai mare buget?	cel mai mare buget, film, Tim Burton
			85	boolean	true	true	false		en	Does Breaking Bad have more episodes than Game of Thrones?	Breaking Bad, episodes, more than, Game of Thrones		PREFIX dbo: <http://dbpedia.org/ontology/> PREFIX res: <http://dbpedia.org/resource/> ASK WHERE { res:Breaking_Bad dbo:numberOfEpisodes ?x . res:Game_of_Thrones dbo:numberOfEpisodes ?y . FILTER (?y > ?x) }																					false
									pt_BR	Breaking Bad tem mais episódios do que Game of Thrones?	Breaking Bad, mais, episódios, Game of Thrones
									de	Hat Breaking Bad mehr Episoden als Game of Thrones?	Breaking Bad, Episoden, mehr als, Game of Thrones
									es	¿Tiene Breaking Bad más episodios que Game of Thrones?	Breaking Bad, episodios, más que, Game of Thrones
									it	Breaking Bad ha più episodi di Game of Thrones?	Breaking Bad, eposido, più di, Game of Thrones
									fr	A Breaking Bad plus d'épisodes que Game of Thrones?	Breaking Bad, épisodes plus que, Game of Thrones
									nl	Heeft Breaking Bad meer afleveringen dan Game of Thrones?	Breaking Bad, afleveringen, meer dan, Game of Thrones
									hi_IN	ब्रेकिंग बैड में गेम ऑफ़ थ्रोन्स की तुलना में अधिक एपिसोड हैं?	ब्रेकिंग बैड, गेम ऑफ़ थ्रोन्स, अधिक एपिसोड
									ro	Are Breaking Bad mai multe episoade decât Game of Thrones?	Breaking Bad, episoade, mai multe decât, Game of Thrones
			86	resource	false	false	false		en	Who was called Rodzilla?	called, Rodzilla		PREFIX dbp: <http://dbpedia.org/property/> SELECT DISTINCT ?uri WHERE { ?uri dbp:nickname "Rodzilla"@en . }			uri							uri	http://dbpedia.org/resource/Rodney_Blake
									pt_BR	Quem era chamado de Rodzilla?	chamado, Rodzilla
									de	Wer wurde Rodzilla genannt?	genannt, Rodzilla
									es	¿Quien se llamaba Rodzilla?	llamaba, Rodzilla
									it	Chi era chiamato Rodzilla?	chiamato, Rodzilla
									fr	Qui était appelé Rodzilla?	appelé, Rodzilla
									nl	Wie werd Rodzilla genoemd?	genoemd, Rodzilla
									hi_IN	किसको रॉडज़िला कहा जाता था?	रॉडज़िला
									ro	Cine a fost numit Rodzilla?	numit, Rodzilla
			87	boolean	false	true	false		en	Was Natalie Portman born in the United States?	Natalie Portman, born, United States		PREFIX dbo: <http://dbpedia.org/ontology/> PREFIX res: <http://dbpedia.org/resource/> ASK WHERE { res:Natalie_Portman dbo:birthPlace ?city . ?city dbo:country res:United_States . }																					false
									pt_BR	Natalie Portman nasceu nos Estados Unidos?	Natalie Portman, nasceu, Estados Unidos
									de	Wurde Natalie Portman in den Vereinigten Staaten geboren?	Natalie Portman, geboren, Vereinigte Staaten
									es	¿Nació Natalie Portman en los estados unidos de américa?	Natalie Portman
									it	Natalie Portman, nata, Stati Uniti d'America	Natalie Portman, nata, Stati Uniti d'America
									fr	Natalie Portman est-elle née aux Etats-Unis?	Natalie Portman, née, Etats-Unis
									nl	Werd Natalie Portman geboren in de Verenigde Staten?	Natalie Portman, geboren, Verenigde Staten
									hi_IN	क्या नेटली पोर्टमैन संयुक्त राज्य में पैदा हुइ थी ?	नेटली पोर्टमैन, संयुक्त राज्य, पैदा
			88	resource	false	true	false		en	Give me the grandchildren of Elvis Presley.	Elvis Presley, grandchildren		SELECT DISTINCT ?uri WHERE { <http://dbpedia.org/resource/Elvis_Presley> <http://dbpedia.org/ontology/child> ?child . ?child <http://dbpedia.org/ontology/child> ?uri . }			uri							uri	http://dbpedia.org/resource/Riley_Keough
									pt_BR	Mostre os netos de Elvis Presley.	netos, Elvis Presley
									fa	نوه های الویس پرسلی را لیست کن.	نوه های، الویس پرسلی
									de	Gib mir die Enkel von Elvis Presley.	Elvis Presley, Enkel
									es	Dame todos los nietos de Elvis Presley.	Elvis Presley, nietos
									it	Dammi i nipoti di Elvis Presley.	Elvis Presley, nipoti
									fr	Donne-moi tous les petit-enfants de Elvis Presley.	petit-enfants, Elvis Presley
									nl	Toon alle kleinkinderen van Elvis Presley.	Elvis Presley, kleinkinderen
									hi_IN	मुझे एल्विस प्रेस्ली के पोतों के नाम दे।	एल्विस प्रेस्ली, पोतो के नाम
									ro	Dă-mi nepoții lui Elvis Presley.	Elvis Presley, nepoți
			89	resource	false	true	false		en	Which movies starring Mickey Rourke were directed by Guy Ritchie?	movies, starring, Mickey Rourke, directed, Guy Ritchie		SELECT DISTINCT ?uri WHERE { ?uri <http://www.w3.org/1999/02/22-rdf-syntax-ns#type> <http://dbpedia.org/ontology/Film> . ?uri <http://dbpedia.org/ontology/starring> <http://dbpedia.org/resource/Mickey_Rourke> . ?uri <http://dbpedia.org/ontology/director> <http://dbpedia.org/resource/Guy_Ritchie> . }			uri							uri	http://dbpedia.org/resource/The_Hire
									pt_BR	Quais filmes protagonizados por Mickey Rourke foram dirigidos por Guy Ritchie?	filmes, estrelados, Mickey Rourke, dirigidos, Guy Ritchie
									fa	چه فیلم هایی با بازی میکی رورک توسط گای ریچی کارگردانی شدند؟	فیلم هایی، بازی، میکی رورک، گای ریچی، کارگردانی
									de	Bei welchen Filmen, in denen Mickey Rourke mitspielt, hat Guy Ritchie Regie geführt?	Filme, mitspielen, Mickey Rourke, Regie führen, Guy Ritchie
									es	¿Que peliculas protagonizadas por Mickey Rourke han sido dirigidas por Guy Ritchie?	peliculas, protagonizadas, Mickey Rourke, dirigidas, Guy Ritchie
									it	Quali film in cui recita Mickey Rourke sono stati diretti da Guy Ritchie?	film, attore, Mickey Rourke, diretti, Guy Ritchie
									fr	Quels films avec Mickey Rourke furent dirigés par Guy Richtie?	films, acteur, Mickey Rourke, directeur, Guy Richtie?
									nl	Welke films met Mickey Rourke werden geregisseerd door Guy Ritchie?	films, acteur, Mickey Rourke, geregisseerd, Guy Ritchie
									hi_IN	मिकी रोर्के अभिनीत कौन सी फिल्में गाए रिची द्वारा निर्देशित थीं?	मिकी रोर्, अभिनीत, गाए रिची, निर्देशित
									ro	Ce filme cu Mickey Rourke ca protagonist au fost regizate de Guy Ritchie?	filme, Mickey Rourke, protagonist, regizate, Guy Ritchie
			90	resource	false	true	false		en	When did Dracula's creator die?	Dracula, creator, die		SELECT DISTINCT ?date WHERE { <http://dbpedia.org/resource/Count_Dracula> <http://dbpedia.org/ontology/creator> ?x . ?x <http://dbpedia.org/ontology/deathDate> ?date . }			uri							uri	1912-04-20
									pt_BR	Quando morreu o criador de Drácula?	morte, criador, Drácula
									fa	چه زمانی خالق دراکولا فوت کرد؟	خالق، دراکولا، فوت
									de	Wann ist Draculas Schöpfer gestorben?	Dracula, Schöpfer, gestorben
									es	¿Cuando murió el creador de Drácula?	muerte, creador, Drácula
									it	Quando è morto il creatore di Dracula?	Dracula, creatore, morire
									fr	Quand est mort le créateur de Dracula?	mort, créateur, Dracula
									nl	Wanneer stierf de bedenker van Dracula?	stierf, bedenker, Dracula
									hi_IN	ड्रेकुला के निर्माता का निधन कब हुआ?	ड्रेकुला, निर्माता, निधन
									ro	Când a murit creatorul Dracula?	Dracula, creator, a muri
			91	resource	false	true	false		en	Which country does the creator of Miffy come from?	Miffy, creator, country		PREFIX dbo: <http://dbpedia.org/ontology/> PREFIX res: <http://dbpedia.org/resource/> SELECT DISTINCT ?uri WHERE { res:Miffy dbo:creator ?x . ?x dbo:nationality ?uri . }			uri							uri	http://dbpedia.org/resource/Netherlands
									pt_BR	De que país vem o criador de Miffy?	país, criador, Miffy
									de	Aus welchem Land kommt der Erfinder von Nijntje?	Nijntje, Erfinder, Land
									es	¿De qué país viene el creador de Nijntje?	Njintje, creados, país
									it	Da quale stato proviene il creatore di Miffy?	Miffy, creatore, nazione
									fr	De quel pays vient le créateur de Miffy?	pays, créateur, Miffy
									nl	Uit welk land komt de bedenker van Nijntje?	Nijntje, bedenker, nationaliteit
									hi_IN	मिफ्फी के निर्माता किस देश से आते है?	मिफ्फ, निर्माता, देश
			92	string	false	true	false		en	What is Batman's real name?	real name, Batman		SELECT DISTINCT ?s WHERE { <http://dbpedia.org/resource/Batman> <http://dbpedia.org/property/alterEgo> ?s . }			string													literal	Bruce Wayne
									pt_BR	Qual é o nome verdadeiro do Batman?	nome real, Batman
									fa	نام واقعی بتمن چیست؟	نام واقعی، بتمن
									de	Was ist Batmans richtiger Name?	Batman, richtiger Name
									es	¿Cuál es el verdadero nombre de Batman?	verdadero nombre Batman
									it	Qual è il vero nome di Batman?	Batman, vero nome
									fr	Quel est le vrai nom de Batman?	vrai nom, Batman
									nl	Wat is de echte naam van Batman?	Batman, echte naam
									hi_IN	बैटमैन का असली नाम क्या है?	बैटमैन, असली नाम
									ro	Care este numele real al lui Batman?	nume real, Batman
			93	resource	false	true	false		en	What form of government does Russia have?	form of government, Russia		SELECT DISTINCT ?uri WHERE { <http://dbpedia.org/resource/Russia> <http://dbpedia.org/ontology/governmentType> ?uri . }			uri							uri	http://dbpedia.org/resource/Federalism
									pt_BR	Que forma de governo a Rússia possui?	forma de governo, Rússia
									fa	روسیه چه نوع حکومتی دارد؟	روسیه، نوع حکومت
									de	Welche Regierungsform hat Russland?	Russland, Regierungsform
									es	¿Qué forma de gobierno tiene Rusia?	forma de gobierno, Rusia
									it	Quale forma di governo ha la Russia?	forma di governo, Russia
									fr	Quelle est la forme de gouvernement de la Russie?	forme de gouvernement, Russie?
									nl	Welke regeringsvorm heeft Rusland?	regeringsvorm, Rusland
									hi_IN	रूस की सरकार किस प्रकार की है?	रूस, सरकार, प्रकार
									ro	Ce formă de guvern are Rusia?	formă de guvern, Rusia
			94	number	true	true	false		en	How many companies were founded by the founder of Facebook?	companies, founded by, founder, Facebook		SELECT (COUNT(DISTINCT ?uri) as ?c) WHERE { <http://dbpedia.org/resource/Facebook> <http://dbpedia.org/ontology/foundedBy> ?uri . ?uri <http://dbpedia.org/ontology/foundedBy> ?uri . }			c										literal	0
									pt_BR	Quantas companhias foram fundadas pelo fundador do Facebook?	compahias, fundadas, fundador, Facebook
									fa	چه تعداد شرکت توسط مؤسس فیسبوک تأسیس شدند؟	شرکت، مؤسس، فیسبوک، تأسیس
									de	Wieviele Firmen hat der Gründer von Facebook gegründet?	Firmen, gegründet, Gründer, Facebook
									es	¿Cuantas compañías han sido fundadas por el fundador de Facebook?	compañías, fundadas, fundador Facebook
									it	Quante società sono state fondate dal fondatore di Facebook?	società, fondate, fondatore, Facebook
									fr	Combien de companies ont été fondées par le fondateur de Facebook?	nombre, companies, fondées, fondateur, Facebook
									nl	Hoeveel bedrijven werden opgericht door de oprichter van Facebook?	bedrijven, opgericht, oprichter, Facebook
									hi_IN	फेसबुक के संस्थापक द्वारा कितनी कंपनियों की स्थापना की गई थी?	फेसबुक, संस्थापक, कंपनियों की स्थापना
									ro	Câte companii au fost înființate de fondatorul Facebook?	companii, înființate, fondator, Facebook
			95	resource	false	true	false		en	Give me all Canadian Grunge record labels.	record label, Canadian, Grunge		PREFIX dbo: <http://dbpedia.org/ontology/> PREFIX res: <http://dbpedia.org/resource/> PREFIX rdf: <http://www.w3.org/1999/02/22-rdf-syntax-ns#> SELECT DISTINCT ?uri WHERE { ?uri rdf:type dbo:RecordLabel . ?uri dbo:genre res:Grunge . ?uri dbo:country res:Canada . }			uri							uri	http://dbpedia.org/resource/Murderecords
									pt_BR	Liste todas as gravadoras canadenses de música Grunge.	gravadoras, canadenses, música, Grunge
									de	Gib mir alle kanadischen Grunge-Plattenfirmen.	kanadisch, Plattenfirma, Grunge
									es	Dame todos las empresas canadienses productoras de música Grunge.	empresa productora de música, canadiense, Grunge
									it	Dammi tutti i produttori canadesi di musica Grunge.	produttore di musica, canadese, Grunge
									fr	Donnes-moi tous les labels discographiques canadiens de grunge.	labels discographiques, canadiens, grunge
									nl	Noem alle Canadese grunge-platenlabels.	Canadees, platenlabel, Grunge
									hi_IN	मुझे सभी कैनेडियन ग्रांज रिकॉर्ड लेबल की सूचि दें।	कैनेडियन, ग्रांज, रिकॉर्ड लेबल
			96	number	true	true	false		en	How many children did Benjamin Franklin have?	Benjamin Franklin, child		SELECT (COUNT(DISTINCT ?uri) as ?c) WHERE { <http://dbpedia.org/resource/Benjamin_Franklin> <http://dbpedia.org/ontology/child> ?uri . }			c										literal	3
									pt_BR	Quantos filhos Benjamim Franklin teve?	filhos, Benjamim Franklin
									fa	بنجامین فرانکلین چند فرزند دارد؟	بنجامین فرانکلین، فرزند
									de	Wieviele Kinder hatte Benjamin Franklin?	Benjamin Franklin, Kind
									es	¿Cuántos hijos tuvo Benjamin Franklin?	Benjamin Franklin, hijos
									it	Quanti figli ebbe Benjamin Franklin?	Benjamin Franklin, figlio
									fr	Combien d'enfants Benjamin Franklin avait-il?	nombre d'enfants, Benjamin Franklin
									nl	Hoeveel kinderen had Benjamin Franklin?	Benjamin Franklin, kinderen, hoeveel
									hi_IN	बेंजामिन फ्रैंकलिन के कितने बच्चे हैं?	बेंजामिन फ्रैंकलिन, बच्चे
									ro	Câți copii a avut Benjamin Franklin?	Benjamin Franklin, copil
			97	resource	false	true	false		en	List the children of Margaret Thatcher.	Margaret Thatcher, child		PREFIX res: <http://dbpedia.org/resource/> PREFIX dbo: <http://dbpedia.org/ontology/> SELECT DISTINCT ?uri WHERE { res:Margaret_Thatcher dbo:child ?uri . }			uri							uri	http://dbpedia.org/resource/Carol_Thatcher
									pt_BR	Liste os filhos de Margaret Thatcher.	filho, Margaret Thatcher												uri	http://dbpedia.org/resource/Mark_Thatcher
									de	Liste die Kinder von Margaret Thatcher auf.	Margaret Thatcher, Kind
									es	Dame una lista de los hijos de Margaret Thatcher.	Margaret Thatcher, hijos
									it	Elenca i figli di Margaret Thatcher.	Margaret Thatcher, figlio
									fr	Donnes-moi tous les enfants de Margaret Thatcher.	enfants, Margaret Thatcher
									nl	Noem alle kinderen van Margaret Thatcher.	kinderen, Margaret Thatcher
									hi_IN	मार्गरेट थैचर के बच्चों की सूची बनाएं।	मार्गरेट थैचर, बच्चों
			98	resource	false	true	false		en	From which region is the Melon de Bourgogne?	region, Melon de Bourgogne		PREFIX res: <http://dbpedia.org/resource/> PREFIX dbo: <http://dbpedia.org/ontology/> SELECT DISTINCT ?uri WHERE { res:Melon_de_Bourgogne dbo:wineRegion ?uri . }			uri							uri	http://dbpedia.org/resource/Southern_Ontario
									pt_BR	De que região é o Melon de Bourgogne?	região, Melon de Bourgogne												uri	http://dbpedia.org/resource/Loire_Valley_(wine)
									de	Aus welcher Region ist der Melon de Bourgogne?	Region, Melon de Bourgogne												uri	http://dbpedia.org/resource/Oregon
									es	¿De que región es el vino Melon de Bourgogne?	región, Melon de Bourgogne												uri	http://dbpedia.org/resource/Washington_(state)
									it	Da quale regione proviene il Melon de Bourgogne?	regione, Melon de Bourgogne
									fr	De quelle région vient le Melon de Bourgogne?	région, Melon de Bourgogne
									nl	Vanuit welke regio is de Melon de Bourgogne?	regio, Melon de Bourgogne
									hi_IN	मेलन डी बर्गोगोन किस क्षेत्र से है?	मेलन डी बर्गोगोन, क्षेत्र
									ro	Din ce regiune provine Melon-ul de Bourgogne?	regiune, Melon de Bourgogne
			99	resource	true	true	false		en	Who is the oldest child of Meryl Streep?	oldest child, Meryl Streep		PREFIX dbo: <http://dbpedia.org/ontology/> PREFIX res: <http://dbpedia.org/resource/> SELECT DISTINCT ?uri WHERE { res:Meryl_Streep dbo:child ?uri . ?uri dbo:birthDate ?d . } ORDER BY ASC(?d) OFFSET 0 LIMIT 1			uri							uri	http://dbpedia.org/resource/Henry_Wolfe_Gummer
									pt_BR	Qual é o filho mais velho de Meryl Streep?	filho mais velho, Meryl Streep
									de	Wer ist das älteste Kind von Meryl Streep?	ältestes Kind, Meryl Streep
									es	¿Cuál es el hijo mas mayor de Meryl Streep?	hijo mas mayor, Meryl Streep
									it	Chi è il figlio maggiore di Meryl Streep?	figlio maggiore, Meryl Streep
									fr	Qui est l'enfant le plus agé de Merly Streep?	enfant le plus agé, Meryl Streep
									nl	Wie is het oudste kind van Meryl Streep?	oudste kind, Meryl Streep
									hi_IN	मेरिल स्ट्रीप का सबसे पहला बच्चा कौन है?	मेरिल स्ट्रीप, सबसे पहला बच्चा
									ro	Cine este copilul cel mai mare al lui Meryl Streep?	copilul cel mai mare, Meryl Streep
			100	boolean	false	true	false		en	Are tree frogs a type of amphibian?	tree frog, amphibian		PREFIX dbo: <http://dbpedia.org/ontology/> PREFIX res: <http://dbpedia.org/resource/> ASK WHERE { res:Hylidae dbo:class res:Amphibian . }																					true
									pt_BR	As rãs arborícolas são um tipo de anfíbio?	rã arborícola, anfíbio
									de	Sind Laubfrösche Amphibien?	Laubfrosch, Amphibie
									es	¿Son las ranas verdes un tipo de anfibio?	rana verde, anfibio
									it	Le rane verdi sono un tipo di anfibio?	rana verde, anfibio
									fr	Sont les grenouilles arboricoles un type d'amphibiens?	grenouilles arboricoles, amphibien
									nl	Zijn boomkikkers een soort amfibie?	boomkikker, amfibie
									hi_IN	क्या वृक्ष के मेंढक एक प्रकार की उभयचर हैं?	वृक्ष के मेंढक, प्रकार, उभयचर
									ro	Sunt broaștele de copac un tip de amfibieni?	broască de copac, amfibian
			101	boolean	false	true	false		en	Is Christian Bale starring in Velvet Goldmine?	Christian Bale, starring, Velvet Goldmine		PREFIX dbo: <http://dbpedia.org/ontology/> PREFIX res: <http://dbpedia.org/resource/> ASK WHERE { res:Velvet_Goldmine dbo:starring res:Christian_Bale . }																					true
									pt_BR	Christian Bale atua em Velvet Goldmine?	Christian Bale, estrelar, Velvet Goldmine
									de	Spielt Christian Bale in Velvet Goldmine mit?	Christian Bale, mitspielen, Velvet Goldmine
									es	¿Actúa Christian Bale en Velvet Goldmine?	Christian Bale, actúa, Velvet Goldmine
									it	Christian Bale ha recitato in Velvet Goldmine?	Christian Bale, recitare, Velvet Goldmine
									fr	Christian Bale joue-t-il dans Velvet Goldmine?	Christian Bale, joue, Velvet Goldmine
									nl	Speelt Christian Bale in Velvet Goldmine?	Christian Bale, speelt in, Velvet Goldmine
									hi_IN	क्या वेलवेट गोल्डमाइन में अभिनीता क्रिस्चियन बेल है?	वेलवेट गोल्डमाइन, अभिनीता, क्रिस्चियन बेल
									ro	Joacă Christian Bale un rol principal în Velvet Goldmine?	Christian Bale, rol principal, Velevet Goldmine
			102	resource	false	true	false		en	List all games by GMT.	game, GMT		PREFIX dbo: <http://dbpedia.org/ontology/> PREFIX res: <http://dbpedia.org/resource/> SELECT DISTINCT ?uri WHERE { ?uri dbo:publisher res:GMT_Games . }			uri							uri	http://dbpedia.org/resource/Washington's_War
									pt_BR	Liste todos os jogos da GMT.	jogos, GMT												uri	http://dbpedia.org/resource/Fields_of_Fire_(game)
									de	Liste alle Spiele von GMT auf.	Spiel, GMT												uri	http://dbpedia.org/resource/Commands_&_Colors:_Ancients
									es	Dame todos los juegos de GMT.	juegos, GMT												uri	http://dbpedia.org/resource/Twilight_Struggle
									it	Elenca tutti i giochi di GMT.	gioco, GMT												uri	http://dbpedia.org/resource/Sword_of_Rome
									fr	Donne-moi tous les jeux de GMT.	jeux, GMT												uri	http://dbpedia.org/resource/Paths_of_Glory_(board_game)
									nl	Noem alle spelen van GMT.	spel, GMT												uri	http://dbpedia.org/resource/Chandragupta_(board_game)
									hi_IN	जीएमटी द्वारा सभी खेलों की सूची बनाएं।	जीएमटी, खेल
			103	boolean	false	true	false		en	Does the Isar flow into a lake?	Isar, flow, lake		PREFIX dbo: <http://dbpedia.org/ontology/> PREFIX res: <http://dbpedia.org/resource/> PREFIX rdf: <http://www.w3.org/1999/02/22-rdf-syntax-ns#> ASK WHERE { ?x dbo:inflow res:Isar . ?x rdf:type dbo:Lake . }																					true
									pt_BR	O Isar desemboca em um lago?	Isar, desemboca, lago
									de	Fließt die Isar in einen See?	Isar, fließt, See
									es	¿Desemboca el Isar en un lago?	Isar, desemboca, lago
									it	L'Isar sfocia in un lago?	Isar, sfociare, lago
									fr	L'Isar se déverse-t-il dans un lac?	Isar, deverse, lac
									nl	Mondt de Isar uit in een meer?	Isar, uitmonden, meer
									hi_IN	क्या ईसार एक झील में प्रवाहित होती है?	ईसार, झील, प्रवाहित
									ro	Isarul se varsă într-un lac?	Isar, varsă, lac
			104	resource	false	true	false		en	Which airports does Yeti Airlines serve?	airports, Yeti Airlines		SELECT DISTINCT ?uri WHERE { <http://dbpedia.org/resource/Yeti_Airlines> <http://dbpedia.org/ontology/targetAirport> ?uri . }			uri							uri	http://dbpedia.org/resource/Pokhara
									pt_BR	Que aeroportos a Yeti Airlines serve?	aeroportos, Yeti Airlines												uri	http://dbpedia.org/resource/Siddharthanagar
									fa	یتی ایرلاینرز در چه فرودگاه هایی فعالیت می کند؟	یتی ایرلاینرز، فرودگاه هایی												uri	http://dbpedia.org/resource/Biratnagar
									de	Welche Flughäfen fliegt Yeti Airlines an?	Flughäfen, anfliegen, Yeti Airlines
									es	¿Qué aeropuertos sirve Yeti Airlines?	aeropuertos, Yeti Airlines
									it	Quali aeroporti sono serviti da Yeti Airlines?	aeroporti, Yeti Airlines
									fr	Quels sont les aéroports servis par Yeti Airlines?	Yeti Airlines, aéroports
									nl	Naar welke luchthavens vliegt Yeti Airlines?	luchthavens, Yeti Airlines
									hi_IN	यति एयरलाइंस किस हवाई अड्डे की सेवा करती है?	यति एयरलाइंस, हवाई अड्ड, सेवा
									ro	Ce aeroporturi deservește Yeti Airlines?	aeroporturi, Yeti Airlines
			105	resource	true	true	false		en	Which Indian company has the most employees?	Indian company, the most employees		SELECT DISTINCT ?uri WHERE { ?uri a <http://dbpedia.org/ontology/Company> . ?uri <http://dbpedia.org/ontology/location> <http://dbpedia.org/resource/India> . ?uri <http://dbpedia.org/ontology/numberOfEmployees> ?n . } ORDER BY DESC(?n) OFFSET 0 LIMIT 1			uri							uri	http://dbpedia.org/resource/Indian_Railways
									pt_BR	Que empresa indiana tem o maior número de empregados?	empresa indiana, maior número de empregados
									fa	کدام شرکت هندی بیشترین تعداد کارمند را دارد؟	شرکت هندی، بیشترین تعداد کارمند
									de	Welches indische Unternehmen hat die meisten Angestellten?	Unternehmen, Indien, die meisten Angestellten
									es	¿Qué empresa de la India tiene el mayor número de empleados?	empresa India, mayor número empleados
									it	Quale società indiana ha il maggior numero di dipendenti?	società indiana, maggior numero di dipendenti
									fr	Quelle companie indienne a le plus d'employés?	companie indienne, maximum d'employés
									nl	Welke Indiase bedrijf heeft de meeste werknemers?	Indiase bedrijf, de meeste werknemers
									hi_IN	किस भारतीय कंपनी में सबसे अधिक कर्मचारी हैं?	भारतीय, कंपनी, सबसे अधिक कर्मचारी
									ro	Ce companie indiană are cei mai mulți angajați?	companie indiană, cei mai mulți angajați
			106	resource	false	true	false		en	What color expresses loyalty?	color, express, loyalty		SELECT DISTINCT ?uri WHERE { ?uri <http://dbpedia.org/ontology/connotation> <http://dbpedia.org/resource/Loyalty> . }			uri							uri	http://dbpedia.org/resource/Indigo
									pt_BR	Que cor expressa a lealdade?	cor, expressa, lealdade
									fa	چه رنگی وفاداری را بیان می کند؟	رنگی، وفاداری، بیان
									de	Welche Farbe steht für Loyalität?	Farbe, stehen für, Loyalität
									es	¿Qué color expresa lealtad?	color, expresa, lealtad
									it	Quale colore esprime lealtà?	colore, esprimere, lealtà
									fr	Quelle couleur exprime la loyalité?	couleur, loyalité
									nl	Welke kleur staat voor loyaliteit?	kleur, loyaliteit
									hi_IN	कोनसा रंग वफादारी व्यक्त करता है?	रंग, वफादारी
									ro	Ce culoare exprimă loialitate?	culoare, exprimă, loialitate
			107	resource	true	true	false		en	Which city has the most inhabitants?	city, the most inhabitants		PREFIX dbo: <http://dbpedia.org/ontology/> PREFIX res: <http://dbpedia.org/resource/> PREFIX rdf: <http://www.w3.org/1999/02/22-rdf-syntax-ns#> SELECT DISTINCT ?uri WHERE { ?uri rdf:type dbo:City . ?uri dbo:populationTotal ?pop . } ORDER BY DESC(?pop) OFFSET 0 LIMIT 1			uri							uri	http://dbpedia.org/resource/Karachi
									pt_BR	Qual a cidade com maior população?	cidade, maior população
									de	Welche Stadt hat die meisten Einwohner?	Stadt, meisten Einwohner
									es	¿Que ciudad tiene la mayor población?	ciudad, mayor población
									it	Quale città ha il maggior numero di abitanti?	città, maggior numero di abitanti
									fr	Quel ville a le plus grand nombre d'habitants?	ville, plus grand nombre d'habitants
									nl	Welke stad heeft de meeste inwoners?	stad, meeste inwoners
									hi_IN	कौन से शहर में सबसे अधिक निवासी है?	शहर, सबसे अधिक निवासी
									ro	Care oraș are cei mai mulți locuitori?	oraș, cei mai mulți locuitori
			108	resource	false	true	false		en	Who created Wikipedia?	Wikipedia, created		PREFIX dbo: <http://dbpedia.org/ontology/> PREFIX res: <http://dbpedia.org/resource/> SELECT DISTINCT ?uri WHERE { res:Wikipedia dbo:author ?uri . }			uri							uri	http://dbpedia.org/resource/Jimmy_Wales
									pt_BR	Quem criou a Wikipedia?	criador, Wikipedia												uri	http://dbpedia.org/resource/Larry_Sanger
									de	Wer hat Wikipedia gegründet?	Wikipedia, gründen
									es	¿Quién creó Wikipedia?	Wikipedia, creador
									it	Chi ha creato Wikipedia?	Wikipedia, creatore
									fr	Qui est le créateur de Wikipedia?	créateur, Wikipedia
									nl	Wie heeft Wikipedia opgericht?	Wikipedia, oprichter
									hi_IN	विकिपीडिया किसने बनाया?	विकिपीडिया, निर्माता
			109	boolean	false	true	false		en	Is Rita Wilson the wife of Tom Hanks?	Rita Wilson, wife, Tom Hanks		PREFIX dbo: <http://dbpedia.org/ontology/> PREFIX res: <http://dbpedia.org/resource/> ASK WHERE { res:Tom_Hanks dbo:spouse res:Rita_Wilson . }																					true
									pt_BR	Rita Wilson é a esposa de Tom Hanks?	Rita Wilson, esposa, Tom Hanks
									de	Ist Rita Wilson die Frau von Tom Hanks?	Rita Wilson, Frau, Tom Hanks
									es	¿Es Rita Wilson la esposa de Tom Hanks?	Rita Wilson, esposa, Tom Hanks
									it	Rita Wilson è la moglie di Tom Hanks?	Rita Wilson, moglie, Tom Hanks
									fr	Rita Wilson est-elle l'épouse de Tom Hanks?	Rita Wilson, épouse, Tom Hanks
									nl	Is Rita Wilson de vrouw van Tom Hanks?	Rita Wilson, vrouw, Tom Hanks
									hi_IN	क्या रीटा विल्सन टॉम हैंक्स की पत्नी है?	रीटा विल्सन, टॉम हैंक्स, पत्नी
									ro	Este Rita Wilson soția lui Tom Hanks?	Rita Wilson, soție, Tom Hanks
			110	boolean	false	true	false		en	Is the wife of president Obama called Michelle?	Obama, president, wife, called, Michelle		PREFIX dbo: <http://dbpedia.org/ontology/> PREFIX res: <http://dbpedia.org/resource/> PREFIX rdfs: <http://www.w3.org/2000/01/rdf-schema#> ASK WHERE { res:Barack_Obama dbo:spouse ?spouse . ?spouse rdfs:label ?name . FILTER(regex(?name,'Michelle')) }																					true
									pt_BR	A esposa do presidente Obama chama-se Michelle?	esposa, presidente, Obama, chama, Michelle
									de	Heißt die Frau von Präsident Obama Michelle?	Obama, Präsident, Frau, heißen, Michelle
									es	¿La mujer del presidente Obama se llama Michelle?	mujer, presidente, Obama, se lamma, Michelle
									it	La moglie del presidente Obama si chiama Michelle?	moglie, presidente, Obama, si chiama, Michelle
									fr	L'épouse du président Obama s'appelle-t-elle Michelle?	épouse, Obama, Michelle, appelle
									nl	Heet de echtgenote van president Barack Obama Michelle?	echtgenote, Barack Obama, Michelle
									hi_IN	क्या राष्ट्रपति ओबामा की पत्नी का नाम मिशेल है?	राष्ट्रपति ओबामा, पत्नी, मिशेल
			111	number	true	true	false		en	How many ethnic groups live in Slovenia?	how many, ethnic groups, Slovenia		SELECT (COUNT(DISTINCT ?uri) as ?c) WHERE { <http://dbpedia.org/resource/Slovenia> <http://dbpedia.org/ontology/ethnicGroup> ?uri . }			c										literal	4
									pt_BR	Quantos grupos étnicos vivem na Eslovênia?	grupos étnicos, Eslovênia
									fa	چند گروه نژادی در اسلوونی زندگی می کنند؟	گروه نژادی، اسلوونی
									de	Wieviele ethnische Gruppen leben in Slovenien?	Anzahl, ethnische Gruppen, Slovenien
									es	¿Cuántos grupos étnicos viven en Eslovenia?	grupos étnicos Eslovenia
									it	Quanti gruppi etnici vivono in Slovenia?	numero, gruppi etnici, Slovenia
									fr	Combien de groupes ethniques vivent en Slovénie?	nombre, groupes ethniques, Slovénie
									nl	Hoeveel etnische groepen leven in Slovenië?	hoeveel, etnische groepen, Slovenië
									hi_IN	कितने जातीय समूह स्लोवेनिया में रहते हैं?	जातीय समूह, स्लोवेनिया
									ro	Câte grupuri etnice trăiesc în Slovenia?	câte, grupuri etnice, Slovenia
			112	resource	false	true	false		en	Who is the president of Eritrea?	president, Eritrea		SELECT DISTINCT ?uri WHERE { <http://dbpedia.org/resource/Eritrea> <http://dbpedia.org/ontology/leader> ?uri . <http://dbpedia.org/resource/Eritrea> <http://dbpedia.org/ontology/leaderTitle> 'President'@en . }			uri							uri	http://dbpedia.org/resource/Isaias_Afwerki
									pt_BR	Quem é o presidente da Eritrea?	presidente, Eritrea
									fa	رئیس جمهور اریتره کیست؟	رئیس جمهور، اریتره
									de	Wer ist der Präsident von Eritrea?	Präsident, Eritrea
									es	¿Quién es el presidente de Eritrea?	presidente Eritrea
									it	Chi è il presidente dell'Eritrea?	presidente, Eritrea
									fr	Qui est le président de l'Érytrée?	président, Erythrée
									nl	Wie is de president van Eritrea?	president, Eritrea
									hi_IN	इरीट्रिया के राष्ट्रपति कौन है?	इरीट्रिया, राष्ट्रपति
									ro	Cine este președintele Eritreei?	președinte, Eritreea
			113	resource	false	true	false		en	Which films did Stanley Kubrick direct?	film, Stanley Kubrick, direct		SELECT DISTINCT ?uri WHERE { ?uri <http://dbpedia.org/ontology/director> <http://dbpedia.org/resource/Stanley_Kubrick> . }			uri							uri	http://dbpedia.org/resource/Day_of_the_Fight
									pt_BR	Que filmes Stanley Kubrick dirigiu?	filmes, Stanley Kubrick, dirigiu												uri	http://dbpedia.org/resource/Barry_Lyndon
									fa	چه فیلم هایی را استنلی کوبریک کارگردانی کرده است؟	فیلم هایی، استنلی کوبریک، کارگردانی												uri	http://dbpedia.org/resource/A_Clockwork_Orange_(film)
									de	Bei wievielen Filmen hat Stanley Kubrick Regie geführt?	wieviele, Filme, Stanley Kubrick, Regie												uri	http://dbpedia.org/resource/2001:_A_Space_Odyssey_(film)
									es	¿Qué películas dirigio Stanley Kubrick?	películas, director, Stanley Kubrick												uri	http://dbpedia.org/resource/The_Shining_(film)
									it	Quanti film ha diretto Stanley Kubrick?	film, Stanley Kubrick, dirigere												uri	http://dbpedia.org/resource/Fear_and_Desire
									fr	Quels films ont été dirigés par Stanley Kubrick?	films, directeur, Stanley Kubrick												uri	http://dbpedia.org/resource/The_Killing_(film)
									nl	Hoveel films heeft Stanley Kubrick geregisseerd?	films, Stanley Kubrick, regisseur												uri	http://dbpedia.org/resource/Paths_of_Glory
									hi_IN	स्टैनले कुब्री ने कौन सी फिल्मे निर्देशित की हैं ?	स्टैनले कुब्री, फिल्म, निर्देशित												uri	http://dbpedia.org/resource/Flying_Padre
									ro	Ce filme a regizat Stanley Kubrick?	film, Stanley Kubrick, regiza												uri	http://dbpedia.org/resource/Eyes_Wide_Shut
																							uri	http://dbpedia.org/resource/Full_Metal_Jacket
																							uri	http://dbpedia.org/resource/Killer's_Kiss
																							uri	http://dbpedia.org/resource/The_Seafarers
																							uri	http://dbpedia.org/resource/Dr._Strangelove
																							uri	http://dbpedia.org/resource/Spartacus_(film)
																							uri	http://dbpedia.org/resource/Lolita_(1962_film)
			114	date	false	true	false		en	When was the Titanic completed?	Titanic, completion date		PREFIX dbo: <http://dbpedia.org/ontology/> PREFIX res: <http://dbpedia.org/resource/> SELECT DISTINCT ?date WHERE { res:RMS_Titanic dbo:completionDate ?date . }			date				literal	1912-04-02
									pt_BR	Quando o Titanic foi completado?	Titanic, completado
									de	Wann wurde die Titanic fertiggestellt?	Titanic, fertiggestellt, Datum
									es	¿Cuando se completo el Titanic?	fecha de acabado, Titanic
									it	Quando è stato completato il Titanic?	Titanic, data, completamento
									fr	Quand a été terminé le Titanic?	data de terminaison, Titanic
									nl	Wanneer was de Titanic afgewerkt?	Titanic, wanneer, afgewerkt
									hi_IN	टाइटैनिक कब पूरा हुआ?	टाइटैनिक, पूरा
									ro	Când a fost terminat Titanicul?	Titanic, data terminării
			115	resource	false	true	false		en	How many pages does War and Peace have?	how many, pages, War and Peace		PREFIX dbo: <http://dbpedia.org/ontology/> PREFIX res: <http://dbpedia.org/resource/> SELECT DISTINCT ?n WHERE { res:War_and_Peace dbo:numberOfPages ?n . }			uri							uri	1225
									pt_BR	Quantas páginas tem Guerra e Paz?	páginas, Guerra e Paz
									de	Wieviele Seiten hat Krieg und Frieden?	wieviele, Seiten, Krieg und Frieden
									es	¿Cuántas páginas tiene Guerra y Paz?	número paginas, Guerra y Paz
									it	Quante pagine ha Guerra e Pace?	pagine, Guerra e Pace
									fr	Combien de pages a Guerre et Paix?	nomber de pages, Guerre et Paix
									nl	Hoeveel pagina's heeft Oorlog en vrede?	hoeveel pagina's, Oorlog en vrede
									hi_IN	वॉर एंड पीस में कितने पृष्ठ हैं?	वॉर एंड पीस, कितने पृष्ठ
									ro	Câte pagini are Război și Pace?	câte pagini, Război și Pace
			116	resource	true	true	false		en	Who is the youngest player in the Premier League?	player, Premier League, youngest		PREFIX dbo: <http://dbpedia.org/ontology/> PREFIX res: <http://dbpedia.org/resource/> SELECT DISTINCT ?uri WHERE { ?uri dbo:team ?x . ?x dbo:league res:Premier_League . ?uri dbo:birthDate ?y . } ORDER BY DESC(?y) OFFSET 0 LIMIT 1			uri							uri	http://dbpedia.org/resource/Ernie_Pinkney
									pt_BR	Quem é o jogador mais jovem da Premier League?	jogador, mais jovem, Premier League
									de	Wer ist der jüngste Spieler in der Premier League?	Spieler, Premier League, jüngste
									es	¿Quién es el jugador más jóven de la Premier League?	jugador, más jóven, Premier League
									it	Chi è il giocatore più giovane della Premier League?	giocatore, Premier League, più giovane
									fr	Quel est le joueur le plus jeune de la Premier League?	joueur, Premier League, plus jeune
									nl	Wie is de jongste speler in de Premier League?	speler, jongste, Premier League
									hi_IN	प्रीमियर लीग में सबसे कम उम्र के खिलाड़ी कौन हैं?	प्रीमियर लीग, सबसे कम उम्र, खिलाड़ी
									ro	Cine este cel mai tânăr jucător din Premier League?	juător, Premier League, cel mai tânăr
			117	resource	false	true	false		en	What is the highest mountain in Italy?	highest, mountain, Italy		PREFIX dbo: <http://dbpedia.org/ontology/> PREFIX res: <http://dbpedia.org/resource/> PREFIX rdf: <http://www.w3.org/1999/02/22-rdf-syntax-ns#> SELECT DISTINCT ?uri WHERE { ?uri rdf:type dbo:Mountain . ?uri dbo:locatedInArea res:Italy . ?uri dbo:elevation ?num . } ORDER BY DESC(?num) OFFSET 0 LIMIT 1			uri							uri	http://dbpedia.org/resource/Mont_Blanc
									pt_BR	Qual a montanha mais alta da Itália?	montanha, mais alta, Itália
									de	Was ist der höchste Berg in Italien?	höchste, Berg, Italien
									es	¿Cuál es la montaña mas alta en Italia?	la montaña mas alta Italia
									it	Qual è la montagna più alta in Italia?	montagna, più alta, Italia
									fr	Quelle est la plus haute montagne d'Italie?	plus haute, plus haute, Italie
									nl	Wat is de hoogste berg in Italië?	hoogste, berg, Italië
									hi_IN	इटली में सर्वोच्च पर्वत कोनसा है?	इटली, सर्वोच्च पर्वत
									ro	Care este cel mai înalt munte din Italia?	cel mai înalt, munte, Italia
			118	number	false	true	false		en	How tall is Claudia Schiffer?	Claudia Schiffer, tall		PREFIX res: <http://dbpedia.org/resource/> PREFIX dbo: <http://dbpedia.org/ontology/> SELECT DISTINCT ?height WHERE { res:Claudia_Schiffer dbo:height ?height . }			c										literal	1.81
									pt_BR	Qual a altura de Claudia Schiffer?	Claudia Schiffer, groß
									de	Wie groß ist Claudia Schiffer?	Claudia Schiffer, groß
									es	¿Cómo de alta es Claudia Schiffer?	Claudia Schiffer, altura
									it	Quanto è alta Claudia Schiffer?	Claudia Schiffer, altezza
									fr	Quelle est la taille de Claudia Schiffer?	taille, Claudia Schiffer
									nl	Hoe lang is Claudia Schiffer?	lengte, Claudia Schiffer
									hi_IN	क्लाउडिया शिफ़ेर कितनी लंबी है?	क्लाउडिया शिफ़ेर, कितनी लंबी
			119	resource	false	true	false		en	Who was John F. Kennedy's vice president?	John F. Kennedy, vice president		PREFIX dbo: <http://dbpedia.org/ontology/> PREFIX res: <http://dbpedia.org/resource/> SELECT DISTINCT ?uri WHERE { res:John_F._Kennedy dbo:vicePresident ?uri . }			uri							uri	http://dbpedia.org/resource/Lyndon_B._Johnson
									pt_BR	Quem foi o vice presidente de John F. Kennedy?	John F. Kennedy
									de	Wer war der Vizepräsident unter John F. Kennedy?	John F. Kennedy, Vizepräsident
									es	¿Quién fué el vicepresidente de John F. Kennedy?	John F. Kennedy, vicepresidente
									it	Chi fu il vicepresidente di John F. Kennedy?	John F. Kennedy, vicepresidente
									fr	Qui était le vice-président de John F. Kennedy?	John F. Kennedy, vice-président
									nl	Wie was de vicepresident onder John F. Kennedy?	John F. Kennedy, vicepresident
									hi_IN	जॉन एफ कैनेडी के उपाध्यक्ष कौन थे?	जॉन एफ कैनेडी, उपाध्यक्ष
									ro	Cine a fost vicepreședintele lui John F. Kennedy?	John F. Kennedy, vicepreședinte
			120	resource	false	true	false		en	Which subsidiary of Lufthansa serves both Dortmund and Berlin Tegel?	subsidiary, Lufthansa, serve, Dortmund, Berlin Tegel		PREFIX res: <http://dbpedia.org/resource/> PREFIX dbo: <http://dbpedia.org/ontology/> SELECT DISTINCT ?uri WHERE { res:Lufthansa dbo:subsidiary ?uri . ?uri dbo:targetAirport res:Dortmund_Airport . ?uri dbo:targetAirport res:Berlin_Tegel_Airport . }			uri							uri	http://dbpedia.org/resource/Germanwings
									pt_BR	Que subsidiária da Lufthansa atende Dortmund e Berlin?	Tochtergesellschaft, Lufthansa, anfliegen, Dortmund, Berlin Tegel
									de	Welche Tochtergesellschaft von Lufthansa fliegt sowohl Dortmund als auch Berlin Tegel an?	Tochtergesellschaft, Lufthansa, anfliegen, Dortmund, Berlin Tegel
									es	¿Qué subsidiario de Lufthansa vuela en Dortmund y en Berlin?	subsidiario, Lufthansa, vuela, Dortmund y Berlin
									it	Quale società sussidiaria di Lufthansa serve sia Dortmund che Berlin Tegel?	società sussidiaria di Lufthansa, servire, Dortmund, Berlin Tegel
									fr	Quelle subsidiaire de Lufhansa vole sur Dortmund et Berlin Tegel?	subsidiaire, Lufhansa, vole sur, Dortmund, Berlin Tegel
									nl	Welke dochteronderneming van Lufthansa bedient zowel Dortmund en Berlin Tegel?	dochteronderneming, Lufthansa, bedient, Dortmund, Berlin Tegel
									hi_IN	लुफ्तहांसा की कौन सी सहायक कंपनी डॉर्टमुंड और बर्लिन टेगल दोनों की सेवा करती है?	लुफ्तहांसा, सहायक कंपनी, डॉर्टमुंड, बर्लिन टेगल, सेवा
									ro	Care filială a Lufthansa deservește atât Dortmund cât și Berlin Tegel?	filială, Lufthansa, deservește, Dortmund, Berlin Tegel
			121	resource	false	true	false		en	Who was the successor of John F. Kennedy?	John F. Kennedy, successor		PREFIX dbo: <http://dbpedia.org/ontology/> PREFIX res: <http://dbpedia.org/resource/> SELECT DISTINCT ?uri WHERE { res:John_F._Kennedy dbo:successor ?uri . }			uri							uri	http://dbpedia.org/resource/Benjamin_A._Smith_II
									pt_BR	Quem foi o sucessor de John F. Kennedy?	sucessor, John F. Kennedy												uri	http://dbpedia.org/resource/Lyndon_B._Johnson
									de	Wer war der Nachfolger von John F. Kennedy?	John F. Kennedy, Nachfolger												uri	http://dbpedia.org/resource/Tip_O'Neill
									es	¿Quién fué el sucesor de John F. Kennedy?	sucesor, John F. Kennedy
									it	Chi fu il successore di John F. Kennedy?	John F. Kennedy, successore
									fr	Qui était le successeur de John F. Kennedy?	John F. Kennedy, successeur
									nl	Wie was de opvolger van John F. Kennedy?	John F. Kennedy, opvolger
									hi_IN	जॉन एफ कैनेडी के उत्तराधिकारी कौन थे?	जॉन एफ कैनेडी, उत्तराधिकारी
			122	resource	false	true	false		en	Who composed the soundtrack for Cameron's Titanic?	compose, soundtrack, Cameron's Titanic		SELECT DISTINCT ?uri WHERE { <http://dbpedia.org/resource/Titanic_(1997_film)> <http://dbpedia.org/ontology/musicComposer> ?uri . }			uri							uri	http://dbpedia.org/resource/James_Horner
									pt_BR	Quem compôs a trilha sonora do Titanic de Cameron?	compositor, trilha sonora, Titanic, Cameron
									fa	چه کسی موسیقی متن تایتانیک کامرون را نوشته است؟	موسیقی متن، تایتانیک کامرون، نوشته
									de	Wer hat den Soundtrack für Camerons Titanic geschrieben?	Cameron, Titanic, Soundtrack, geschrieben
									es	¿Quién compuso la banda sonora del Titanic de Cameron?	compositor, banda sonora, Titanic de Cameron
									it	Chi ha composto la colonna sonora di Titanic di Cameron?	comporre, colonna sonora, Titanic, Cameron
									fr	Qui a composé le soundtrack du Titanic de Cameron?	compositeur, sountrack, Titanic, Cameron
									nl	Door wie is de filmmuziek van Camerons Titanic geschreven?	filmmuziek, Camerons Titanic, componist
									hi_IN	कैमरन टाइटैनिक के लिए साउंडट्रैक किसने बनाया है?	कैमरन टाइटैनिक, साउंडट्रैक, बनाया
									ro	Cine a compus coloana sonoră pentru Titanicul lui Cameron?	compus, coloana sonoră, Titanicul lui Cameron
			123	resource	true	true	false		en	Which movies did Kurosawa direct?	film, direct, Kurosawa		PREFIX dbo: <http://dbpedia.org/ontology/> PREFIX res: <http://dbpedia.org/resource/> PREFIX rdf: <http://www.w3.org/1999/02/22-rdf-syntax-ns#> SELECT DISTINCT ?uri WHERE { ?uri rdf:type dbo:Film . ?uri dbo:director res:Akira_Kurosawa . }			uri							uri	http://dbpedia.org/resource/The_Idiot_(1951_film)
									pt_BR	Quais filmes Kurosawa dirigiu?	filmes, Kurosawa, dirigiu												uri	http://dbpedia.org/resource/Dreams_(1990_film)
									de	Welche Filme hat Kurosawa gedreht?	Film, drehen, Kurosawa												uri	http://dbpedia.org/resource/The_Bad_Sleep_Well
									es	¿Qué películas ha rodado Kurosawa?	película, rodada, Kurosawa?												uri	http://dbpedia.org/resource/The_Hidden_Fortress
									it	Che film ha diretto Kurosawa?	film, dirigere, Kurosawa												uri	http://dbpedia.org/resource/Throne_of_Blood
									fr	Quels films ont été realisés par Kurosawa?	films, Kurosawa												uri	http://dbpedia.org/resource/Drunken_Angel
									nl	Welke films heeft Kurosawa geregisseerd?	film, Kurosawa, regisseur												uri	http://dbpedia.org/resource/Kagemusha
									hi_IN	कुरोसावा ने कौन सी फिल्मों का निर्देशन किया है ?	कुरोसावा, फिल्मो, निर्देशन												uri	http://dbpedia.org/resource/Rhapsody_in_August
									ro	Ce filme a regizat Kurosawa?	film, regiza, Kurosawa												uri	http://dbpedia.org/resource/Dersu_Uzala_(1975_film)
																							uri	http://dbpedia.org/resource/Sanshiro_Sugata
																							uri	http://dbpedia.org/resource/Seven_Samurai
																							uri	http://dbpedia.org/resource/Sanjuro
																							uri	http://dbpedia.org/resource/Scandal_(1950_film)
																							uri	http://dbpedia.org/resource/Sanshiro_Sugata_Part_II
																							uri	http://dbpedia.org/resource/One_Wonderful_Sunday
																							uri	http://dbpedia.org/resource/The_Most_Beautiful
																							uri	http://dbpedia.org/resource/The_Quiet_Duel
																							uri	http://dbpedia.org/resource/Madadayo
																							uri	http://dbpedia.org/resource/High_and_Low_(1963_film)
																							uri	http://dbpedia.org/resource/Ikiru
																							uri	http://dbpedia.org/resource/Red_Beard
																							uri	http://dbpedia.org/resource/Dodes'ka-den
																							uri	http://dbpedia.org/resource/Those_Who_Make_Tomorrow
																							uri	http://dbpedia.org/resource/Yojimbo_(film)
																							uri	http://dbpedia.org/resource/Rashomon
																							uri	http://dbpedia.org/resource/Stray_Dog_(film)
																							uri	http://dbpedia.org/resource/Horse_(1941_film)
																							uri	http://dbpedia.org/resource/No_Regrets_for_Our_Youth
																							uri	http://dbpedia.org/resource/Ran_(film)
																							uri	http://dbpedia.org/resource/The_Lower_Depths_(1957_film)
																							uri	http://dbpedia.org/resource/I_Live_in_Fear
																							uri	http://dbpedia.org/resource/The_Men_Who_Tread_on_the_Tiger's_Tail
			124	resource	true	true	false		en	For which label did Elvis record his first album?	Elvis, first, album, label		PREFIX dbo: <http://dbpedia.org/ontology/> PREFIX res: <http://dbpedia.org/resource/> PREFIX rdf: <http://www.w3.org/1999/02/22-rdf-syntax-ns#> SELECT DISTINCT ?uri WHERE { ?x rdf:type dbo:Album . ?x dbo:artist res:Elvis_Presley . ?x dbo:releaseDate ?y . ?x dbo:recordLabel ?uri . } ORDER BY ASC(?y) OFFSET 0 LIMIT 1			uri							uri	http://dbpedia.org/resource/Pickwick_Records
									pt_BR	Para qual gravadora Elvis gravou seu primeiro álbum?	gravadora, Elvis, gravou, primeiro, álbum
									de	Welche Plattenfirma hat Elvis' erstes Album aufgenommen?	Elvis, erstes, Album, Plattenfirma
									es	¿Qué discográfica grabó el primer album de Elvis?	discográfica, primer album de Elvis
									it	Quale casa discografica ha inciso il primo album di Elvis?	Elvis, primo, album, casa discografica
									fr	Quel est le label discographe qui a publié le premier disque d'Elvis?	label discographe, publié, premier disque, Elvis
									nl	Bij welk platenlabel verscheen het eerste album van Elvis Presley?	platenlabel, eerste album, Elvis
									hi_IN	किस लेबल के लिए एल्विस ने अपना पहला एल्बम रिकॉर्ड किया था?	लेबल, एल्विस, पहला एल्बम, रिकॉर्ड
									ro	Ce casă discografică a înregistrat primul album al lui Elvis?	Elvis, prim, album, casă discografică
			125	resource	false	true	false		en	In which time zone is Rome?	time zone, Rome		SELECT DISTINCT ?uri WHERE { <http://dbpedia.org/resource/Rome> <http://dbpedia.org/ontology/timeZone> ?uri . }			uri							uri	http://dbpedia.org/resource/Central_European_Time
									pt_BR	Em que fuso horário está Roma?	fuso horário, Roma
									fa	رم در چه ناحیه زمانی قرار دارد؟	رم، ناحیه زمانی
									de	In welcher Zeitzone liegt Rom?	Rom, Zeitzone
									es	¿En qué zona horaria esta Roma?	zona horaria, Roma
									it	Qual è il fuso orario di Roma?	fuso orario, Roma
									fr	Quelle est la zone horaire de Rome?	zone horaire, Rome
									nl	In welke tijdzone zit Rome?	Rome, tijdzone
									hi_IN	रोम किस समय क्षेत्र में है?	रोम, समय क्षेत्र
									ro	Pe ce fus orar este Roma?	fus orar, Roma
			126	resource	false	true	false		en	Give me the currency of China.	currency, China		PREFIX res: <http://dbpedia.org/resource/> PREFIX dbo: <http://dbpedia.org/ontology/> SELECT DISTINCT ?uri WHERE { res:China dbo:currency ?uri . }			uri							uri	http://dbpedia.org/resource/Renminbi
									pt_BR	Qual a moeda da China?	Währung, China
									de	Welche Währung benutzt China?	Währung, China
									es	¿Cual es la moneda de China?	moneda, China
									it	Dammi la valuta della Cina.	valuta, Cina
									fr	Doone-moi la monnaie chinoise.	monnaie, chinoise
									nl	Wat is de munteenheid van China?	munteenheid, China
									hi_IN	मुझे चीन की मुद्रा बतायें ।	चीन, मुद्रा
									ro	Care este moneda din China?	moneda, China
			127	resource	false	true	false		en	Who are the developers of DBpedia?	developers, DBpedia		SELECT DISTINCT ?uri WHERE { <http://dbpedia.org/resource/DBpedia> <http://dbpedia.org/ontology/developer> ?uri . }			uri							uri	http://dbpedia.org/resource/University_of_Mannheim
									pt_BR	Quem são os desenvolvedores do DBPedia?	desenvolvedor, DBPedia												uri	http://dbpedia.org/resource/Leipzig_University
									fa	چه کسانی توسعه دهندگان دی.بی.پدیا هستند؟	توسعه دهندگان، دی.بی.پدیا												uri	http://dbpedia.org/resource/OpenLink_Software
									de	Wer sind die Entwickler von DBpedia?	Entwickler, DBpedia
									es	¿Quiénes son los desarrolladores de DBpedia?	desarrolladores, DBpedia
									it	Chi ha sviluppato DBpedia?	sviluppatori, DBpedia
									fr	Qui sont les développeurs de DBpedia?	développeurs, DBpedia
									nl	Wie heeft DBpedia ontwikkeld?	DBpedia, ontwikkelaar
									hi_IN	डीबीपीडिया के डेवलपर कौन हैं?	डीबीपीडिया, डेवलपर, विकासक
									ro	Cine sunt dezvoltatorii DBpedia?	dezvoltatori, DBpedia
			128	boolean	false	true	false		en	Does Abraham Lincoln's death place have a website?	Abraham Lincoln, death place, website		PREFIX dbo: <http://dbpedia.org/ontology/> PREFIX res: <http://dbpedia.org/resource/> ASK WHERE { res:Abraham_Lincoln dbo:deathPlace ?p . ?p dbo:website ?w . }																					false
									pt_BR	O local onde Abraham Lincoln morreu tem um website?	local, Abraham Lincoln, morreu, website
									de	Hat Abraham Lincolns Sterbeort eine Webseite?	Abraham Lincoln, Sterbeort, Webseite
									es	¿Tiene el lugar de nacimiento de Abraham Lincol una página web?	Abraham Lincoln, lugar de nacimiento, página web
									it	Il luogo di morte di Abraham Lincoln ha un sito web?	Abraham Lincoln, luogo di morte, website
									fr	A le lieu de décès d'Abraham Lincoln une page Web?	Abraham Lincoln, lieu de décès, page Web
									nl	Heeft de stad waarin Abraham Lincoln is overleden een website?	Abraham Lincoln, stad, gestorven, website
									hi_IN	अब्राहम लिंकन की मौत की जगह की बसाइट है?	अब्राहम लिंकन, मौत, जगह, बसाइट
									ro	Locul morții lui Abraham Lincoln are un website?	locul morții, Abraham Lincoln, website
			129	resource	false	true	false		en	Who is the king of the Netherlands?	king, the Netherlands		SELECT DISTINCT ?uri WHERE { <http://dbpedia.org/resource/Netherlands> <http://dbpedia.org/ontology/leader> ?uri . ?uri a <http://dbpedia.org/ontology/Royalty> . }			uri							uri	http://dbpedia.org/resource/Willem-Alexander_of_the_Netherlands
									pt_BR	Quem é o rei da Holanda?	rei, Países Baixos
									fa	پادشاه هلند کیست؟	پادشاه، هلند
									de	Wer ist der König der Niederlande?	König, Niederlande
									es	¿Quién es el rey de los Países Bajos?	rey, Países Bajos
									it	Chi è il re dei Paesi Bassi?	re, Paesi Bassi
									fr	Qui est le roi des Pays-Bas?	roi, pays-bas
									nl	Wie is de koning van Nederland?	koning, Nederland
									hi_IN	नीदरलैंड का राजा कौन है?	नीदरलैंड, राजा
									ro	Cine este regele Țărilor de Jos?	rege, Țările de Jos
			130	resource	false	true	false		en	In which city did Nikos Kazantzakis die?	city, Nikos Kazantzakis, die		SELECT DISTINCT ?uri WHERE { <http://dbpedia.org/resource/Nikos_Kazantzakis> <http://dbpedia.org/ontology/deathPlace> ?uri . ?uri a <http://dbpedia.org/ontology/Town> . }			uri							uri	http://dbpedia.org/resource/Freiburg_im_Breisgau
									pt_BR	Em que cidade Nikos Kazantzakis morreu?	cidade, Nikos Kazantzakis, morreu
									fa	نیکوس کازانتزاکیس در کدام کشور مرد؟	نیکوس کازانتزاکیس، کشور، مرد
									de	In welcher Stadt ist Nikos Kazantzakis gestorben?	Nikos Kazantzakis, Stadt, gestorben
									es	¿En que ciudad murió Nikos Kazantzakis?	ciudad, murió, Nikos Kazantzakis?
									it	In quale città è morto Nikos Kazantzakis	città, Nikos Kazantzakis, morto
									fr	Dans quelle ville est mort Kazantsakis?	ville de décès, Kazantsakis
									nl	In welke stad is Nikos Kazantzakis overleden?	Nikos Kazantzakis, overleden, stad
									hi_IN	निकोस काजांटाजाकिस का किस शहर में निधन हुआ ?	निकोस काजांटाजाकिस, शहर, निधन
									ro	În ce oraș a murit Nikos Kazantsakis?	oraș, Nikos Kazantsakis, murit
			131	resource	false	false	false		en	Who was the father of Queen Elizabeth II?	father, Queen Elizabeth II		PREFIX res: <http://dbpedia.org/resource/> PREFIX dbp: <http://dbpedia.org/property/> SELECT DISTINCT ?uri WHERE { res:Elizabeth_II dbp:father ?uri . }			uri							uri	http://dbpedia.org/resource/George_VI
									pt_BR	Quem foi o pai da Rainha Elizabeth II?	pai, Rainha Elizabeth II
									de	Wer war der Vater von Königin Elizabeth II?	Vater, Königin Elizabeth II
									es	¿Quién fue el padre de la reina Isabel II?	padre, reina Isabel II
									it	Chi fu il padre della regina Elisabetta II?	padre, regina Elisabetta II
									fr	Qui est le père de la reine Élisabeth II?	père, Élisabeth II
									nl	Wie was de vader van koningin Elizabeth II?	koningin Elizabeth II, vader
									hi_IN	महारानी एलिजाबेथ द्वितीय के पिता कौन थे?	महारानी एलिजाबेथ द्वितीय, पिता
			132	resource	false	true	false		en	Give me a list of all critically endangered birds.	list, critically endangered birds		SELECT DISTINCT ?uri ?p WHERE { ?uri a <http://dbpedia.org/ontology/Bird> . { ?uri <http://dbpedia.org/ontology/conservationStatus> 'CR'^^<http://www.w3.org/2001/XMLSchema#string> . } UNION { ?uri <http://purl.org/dc/terms/subject> <http://dbpedia.org/resource/Category:Critically_endangered_animals> . } }			uri							uri	http://dbpedia.org/resource/Chatham_pigeon
									pt_BR	Liste todas as aves que correm perigo de extinção.	aves, perigo de extinção
									fa	لیستی از پرندگان روبه انقراض را بده.	پرندگان، روبه انقراض
									de	Gib mir eine Liste aller stark bedrohten Vogelarten.	Vogel, stark gefährdet
									es	Dame una lista de todas las aves en peligro de extinción.	aves, peligro de extinción
									it	Dammi la lista di tutti gli uccelli in via di estinzione.	lista, uccelli in via di estinzione
									fr	Donnes-moi la liste des oiseaux en voie de disparition.	oiseaux, voie de disparition
									nl	Geef een lijst met alle ernstig bedreigde vogelsoorten.	vogels, ernstig bedreigd
									hi_IN	मुझे समीक्षकों से लुप्तप्राय पक्षियों की सूची बतायें ।	समीक्षकों, लुप्तप्राय पक्षियों
									ro	Dă-mi o listă cu toate păsările în pericol ridicat de dispariție.	listă, păsări în pericol ridicat de dispariție
			133	number	false	true	false		en	How many inhabitants does the largest city in Canada have?	inhabitants, largest city, Canada		PREFIX dbo: <http://dbpedia.org/ontology/> PREFIX res: <http://dbpedia.org/resource/> SELECT DISTINCT ?num WHERE { res:Canada dbo:largestCity ?city . ?city dbo:populationTotal ?num . }			c										literal	2615060
									pt_BR	Quantos habitantes tem a maior cidade do Canadá?	habitantes, maior cidade, Canadá
									de	Wieviele Einwohner hat die größte Stadt in Kanada?	Einwohner, größte Stadt, Kanada
									es	¿Cuántos habitantes tiene la ciudad más grande de Canadá?	número de habitantes, ciudad más grande de Canadá
									it	Quanti abitanti ha la città più grande del Canada?	abitanti, città più grande, Canada
									fr	Combien d'habitants a large ville la plus grande du Canada?	nombre dhabitants, ville la plus large, Canada
									nl	Hoeveel inwoners heeft de grootste stadt in Canada?	inwoners, grootste, stad, Canada
									hi_IN	कनाडा के सबसे बड़े शहर में कितने निवासी हैं?	कनाडा, सबसे बड़े शहर, निवासी
									ro	Câți locuitori are cel mai are oraș din Canada?	locuitori, cel mai mare oraș, Canada
			134	resource	false	true	false		en	In which military conflicts did Lawrence of Arabia participate?	Lawrence of Arabia, military conflict		PREFIX dbo: <http://dbpedia.org/ontology/> PREFIX res: <http://dbpedia.org/resource/> SELECT DISTINCT ?uri WHERE { res:T._E._Lawrence dbo:battle ?uri . }			uri							uri	http://dbpedia.org/resource/Battle_of_Aqaba
									pt_BR	De quais conflitos militares Lawrence da Arábia participou?	conflitos militares, Lawrence da Arabia												uri	http://dbpedia.org/resource/World_War_I
									de	An welchen militärischen Auseinandersetzungen war Lawrence von Arabien beteiligt?	Lawrence von Arabien, militärische Auseinandersetzung												uri	http://dbpedia.org/resource/Battle_of_Fwelia
									es	¿En qué conflictos militares participó Lawrence de Arabia?	Lawrence de Arabia, conflicto militar												uri	http://dbpedia.org/resource/Siege_of_Medina
									it	A quali conflitti militari ha partecipato Lawrence d'Arabia?	Lawrence d'Arabia, conflitto militare												uri	http://dbpedia.org/resource/Battle_of_Deraa
									fr	Dans quels conflits militaires a participé Lawrence d'Arabie?	Lawrence d'Arabie, conflits militaires												uri	http://dbpedia.org/resource/Arab_Revolt
									nl	Bij welke militaire conflicten was Lawrence of Arabia betrokken?	militair conflict, Lawrence of Arabia												uri	http://dbpedia.org/resource/Battle_of_Megiddo_(1918)
									hi_IN	अरब के लॉरेंस ने किस सैन्य युद्ध में भाग लिया?	अरब के लॉरेंस, सैन्य युद्ध, भाग लिया												uri	http://dbpedia.org/resource/Battle_of_Talifeh
									ro	În care conflicte militare a participat Lawrence al Arabiei?	Lawrence al Arabiei, conflict militar												uri	http://dbpedia.org/resource/Capture_of_Damascus_(1918)
																							uri	http://dbpedia.org/resource/Battle_of_Aba_el_Lissan
			135	resource	true	true	false		en	Which book has the most pages?	book, the most pages		PREFIX dbo: <http://dbpedia.org/ontology/> PREFIX rdf: <http://www.w3.org/1999/02/22-rdf-syntax-ns#> SELECT DISTINCT ?uri WHERE { ?uri rdf:type dbo:Book . ?uri dbo:numberOfPages ?n . } ORDER BY DESC(?n) OFFSET 0 LIMIT 1			uri							uri	http://dbpedia.org/resource/The_Tolkien_Reader
									pt_BR	Qual o livro com maior número de páginas?	livro, maior número de páginas
									de	Welches Buch hat die meisten Seiten?	Buch, meisten Seiten
									es	¿Que libro tiene el mayor numero de paginas?	libro, mayor numero paginas
									it	Quale libro ha il maggior numero di pagine?	libro, maggior numero di pagine
									fr	Quel livre a le plus de pages?	livre, le plus de pages
									nl	Welk boek heeft de meeste pagina's?	boek, meeste pagina's
									hi_IN	कौन से पुस्तक में सबसे अधिक पृष्ठ हैं?	पुस्तक, सबसे अधिक पृष्ठ
									ro	Ce carte are cele mai multe pagini?	carte, cele mai multe pagini
			136	resource	false	true	false		en	In which country does the Nile start?	Nile, start, country		PREFIX dbo: <http://dbpedia.org/ontology/> PREFIX res: <http://dbpedia.org/resource/> SELECT DISTINCT ?uri WHERE { res:Nile dbo:sourceCountry ?uri . }			uri							uri	http://dbpedia.org/resource/Rwanda
									pt_BR	Em que país nasce o Nilo?	país, nasce, Nilo												uri	http://dbpedia.org/resource/Ethiopia
									de	In welchem Land entspringt der Nil?	Nil, entspringen, Land
									es	¿En qué país nace el Nilo?	Nilo, país, orígen
									it	In quale stato nasce il Nilo?	Nilo, stato, origine
									fr	Dans quel pays commence le Nil?	pays, commence, Nil
									nl	In welk land ontspringt de Nijl?	ontspringt, Nijl
									hi_IN	नाइल नदी किस देश में शुरू होती है?	नाइल नदी, देश, शुरू
			137	resource	true	true	false		en	Who is the Formula 1 race driver with the most races?	Formula 1, race driver, races, most		SELECT DISTINCT ?uri WHERE { ?uri <http://www.w3.org/1999/02/22-rdf-syntax-ns#type> <http://dbpedia.org/ontology/FormulaOneRacer> . ?uri <http://dbpedia.org/ontology/races> ?x . } ORDER BY DESC(?x) OFFSET 0 LIMIT 1			uri							uri	http://dbpedia.org/resource/Michael_Schumacher
									pt_BR	Quem é o piloto de Fórmula 1 com mais corridas?	piloto, Fórmula 1, mais, corridas
									fa	چه کسی راننده فرمول 1 با بیشترین مسابقه است؟	راننده، فرمول 1، بیشترین، مسابقه
									de	Wer ist der Formel-1-Fahrer mit den meisten Rennen?	Formel 1, Rennfahrer, Rennen, die meisten
									es	¿Quién es el conductor de Formula 1 con más carreras?	Fconductor, órmula 1, carreras, más
									it	Qual è il pilota di Formula 1 con più gare?	Formula 1, pilota, maggior numero di gare
									fr	Quel est le pilote de Formule 1 qui a gagné le plus de courses?	Formule 1, pilote, plus de courses
									nl	Wie is de Formule 1-coureur met de meeste races op zijn naam?	Formule 1, coureur, races, de meeste
									hi_IN	सबसे अधिक दौड़ वाले फॉर्मूला 1 रेस ड्रायवर कौन है?	सबसे अधिक दौड़, फॉर्मूला 1, रेस ड्रायवर
									ro	Cine este pilotul de curse Formula 1 cu cele mai multe curse?	Formula 1, pilot de curse, cele mai multe
			138	resource	false	true	false		en	Which companies produce hovercrafts?	companies, produce, hovercrafts		SELECT DISTINCT ?uri WHERE { ?uri a <http://dbpedia.org/ontology/Company> . ?uri <http://dbpedia.org/ontology/product> <http://dbpedia.org/resource/Hovercraft> . }			uri							uri	http://dbpedia.org/resource/Saunders-Roe
									pt_BR	Que companhias produzem aerodeslizadores?	companhias, produz, hovercrafts												uri	http://dbpedia.org/resource/Hanjin_Heavy_Industries
									fa	چه شرکت هایی هواناو تولید می کنند؟	شرکت هایی، هواناو، تولید												uri	http://dbpedia.org/resource/British_Hovercraft_Corporation
									de	Welche Firmen stellen Hovercrafts her?	Firma, herstellen, Hovercraft
									es	¿Qué compañías producen aerodeslizadores?	compañías, producen, aerodeslizadores
									it	Quali società producono aeroscafi?	società produrre, aeroscafi
									fr	Quelles companies produisent des aéroglisseurs?	companies, aéroglisseurs
									nl	Welke bedrijven produceren hovercrafts?	bedrijven, produceren, hovercrafts
									hi_IN	कौन सी कंपनियां हॉवरक्राफ्ट बनाती हैं?	कंपनियां, हॉवरक्राफ्ट बनाती
									ro	Care companii produc aeroglisoare?	companii, produc, aeroglisoare
			139	boolean	false	true	false		en	Did Elvis Presley have children?	Elvis Presley, children		ASK WHERE { <http://dbpedia.org/resource/Elvis_Presley> <http://dbpedia.org/ontology/child> ?uri . }																					true
									pt_BR	Elvis Presley teve filhos?	Elvis Presley, filhos
									fa	آیا الویس پرسلی فرزند دارد؟	الویس پرسلی، فرزند
									de	Hatte Elvis Presley Kinder?	Elvis Presley, Kinder
									es	Tuvo hijos Elvis Presley?	hijos, Elvis Presley
									it	Elvis Presley ha avuto dei figli?	Elvis Presley, figli
									fr	Elvis Presley a-t-il eu des enfants?	enfants, Elvis Presley
									nl	Had Elvis Presley kinderen?	Elvis Presley, kinderen
									hi_IN	क्या एल्विस प्रेस्ली के बच्चे थे ?	एल्विस प्रेस्ली, बच्चे
									ro	A avut Elvis Presley copii?	Elvis Presly, copii
			140	resource	false	true	false		en	In which city was the president of Montenegro born?	city, born, president of Montenegro		SELECT DISTINCT ?uri WHERE { ?x <http://dbpedia.org/property/office> <http://dbpedia.org/resource/President_of_Montenegro> . ?x <http://dbpedia.org/ontology/birthPlace> ?uri . ?uri a <http://dbpedia.org/ontology/City> . }			uri							uri	http://dbpedia.org/resource/Belgrade
									pt_BR	Em que cidade o presidente de Montenegro nasceu?	cidade, nasceu, presidente de Montenegro
									fa	رئیس جمهور مونتنگرو در کدام شهر متولد شد؟	رئیس جمهور، مونتنگرو، کشور، متولد
									de	In welcher Stadt ist der Präsident von Montenegro geboren?	Präsident, Montenegro, Geburtsstadt
									es	¿En que ciudad nació el presidente de Montenegro?	ciudad, nació, presidente de Montenegro
									it	In quale città è nato il presidente del Montenegro?	città, nato, presidente del Montenegro
									fr	Quelle est la ville de naissance du président du Monténégro?	ville, naissance, président, Monténégro
									nl	In welke stad is de president van Montenegro geboren?	president, Montenegro, geboortestad
									hi_IN	मोंटेनेग्रो के राष्ट्रपति किस शहर में पैदा हुए थे?	मोंटेनेग्रो, राष्ट्रपति, शहर, पैदा
									ro	În ce oraș s-a născut președintele Muntenegrului?	oraș, născut, președintele Muntenegrului
			141	resource	false	true	false		en	Which country was Bill Gates born in?	country, born, Bill Gates		SELECT DISTINCT ?uri WHERE { <http://dbpedia.org/resource/Bill_Gates> <http://dbpedia.org/ontology/birthPlace> ?x . ?x <http://dbpedia.org/ontology/country> ?uri . }			uri							uri	http://dbpedia.org/resource/United_States
									pt_BR	Em que país Bill Gates nasceu?	país, nascimento, Bill Gates
									fa	بیل گیت در کدام کشور متولد آمد؟	بیل گیت، کشور، متولد
									de	In welchem Land ist Bill Gates geboren?	Bill Gates, Land, geboren
									es	¿En qué país nació Bill Gates?	país nacimiento, Bill Gates
									it	In quale stato è nato Bill Gates?	stato, nato, Bill Gates
									fr	Quel est l'état de naissance de Bill Gates?	état, naissance, Bill Gates
									nl	In welke land is Bill Gates geboren?	Bill Gates, geboorteland
									hi_IN	बिल गेट्स का जन्म किस देश में हुआ था?	बिल गेट्स, जन्म, देश
									ro	În ce țară s-a născut Bill Gates?	țară, născut, Bill Gates
			142	resource	false	true	false		en	In which countries do people speak Japanese?	which countries, speak, Japanese		SELECT DISTINCT ?uri WHERE { ?uri a <http://dbpedia.org/ontology/Country> . ?uri <http://dbpedia.org/ontology/language> <http://dbpedia.org/resource/Japanese_language> . }			uri							uri	http://dbpedia.org/resource/Japan
									pt_BR	Em que país se fala japonês?	país, fala, japonês												uri	http://dbpedia.org/resource/Palau
									fa	در چه کشورهایی مردم ژاپنی صحبت می کنند؟	کشورهایی، ژاپنی، صحبت												uri	http://dbpedia.org/resource/Allied_Military_Government_for_Occupied_Territories
									de	In welcher Ländern wird Japanisch gesprochen?	Länder, Sprache, Japanisch
									es	¿En qué países se habla japonés?	países, habla, japonés
									it	In quali stati si parla giapponese?	stati, parlare, giapponese
									fr	Dans quels pays parle-t-on japonais?	pays, language, japonais
									nl	In welke landen wordt Japans gesproken?	landen, taal, Japans
									hi_IN	किन देशों में लोग जापानी बोलते हैं?	देशों, लोग, जापानी
									ro	În ce țari se vorbește japoneza?	ce țări, vorbește, japoneza
			143	resource	false	true	false		en	Show me the book that Muhammad Ali wrote.	book, wrote, Muhammad Ali		PREFIX dbo: <http://dbpedia.org/ontology/> PREFIX res: <http://dbpedia.org/resource/> PREFIX rdf: <http://www.w3.org/1999/02/22-rdf-syntax-ns#> SELECT DISTINCT ?uri WHERE { ?uri rdf:type dbo:Book . ?uri dbo:author res:Muhammad_Ali . }			uri							uri	http://dbpedia.org/resource/The_Soul_of_a_Butterfly
									pt_BR	Mostre me o livro que Muhammad Ali escreveu.	livro, Muhammad Ali, escreveu
									de	Zeig mir das Buch, das Muhammad Ali geschrieben hat.	Buch, geschrieben, Muhammad Ali
									es	Muéstrame el libro escrito por Muhammad Ali.	libro, autor, Muhammad Ali
									it	Mostrami il libro scritto da Muhammad Ali.	libro, autore, Muhammad Ali
									fr	Donne-moi le livre écrit par Muhammad Ali.	livre, par Muhammad Ali
									nl	Toen het boek dat Muhammad Ali heeft geschreven.	boek, geschreven, Muhammad Ali
									hi_IN	मुझे किताब बताओ जो मुहम्मद अली ने लिखी थी।	किताब, मुहम्मद अली, लिखी
									ro	Arată-mi cartea pe care a scris-o Muhammad Ali.	carte, scris, Muhammad Ali
			144	boolean	false	true	false		en	Is Michelle Obama the wife of Barack Obama?	Michelle Obama, wife, Barack Obama		PREFIX dbo: <http://dbpedia.org/ontology/> PREFIX res: <http://dbpedia.org/resource/> ASK WHERE { res:Barack_Obama dbo:spouse res:Michelle_Obama . }																					true
									pt_BR	Michelle Obama é a esposa de Barack Obama?	Michelle Obama, esposa, Barack Obama
									de	Ist Michelle Obama die Frau von Barack Obama?	Michelle Obama, Frau, Barack Obama
									es	¿Es Michele Obama la esposa de Barack Obama?	Michelle Obama, esposa, Barack Obama
									it	Michelle Obama è la moglie di Barack Obama?	Michelle Obama, moglie, Barack Obama
									fr	Michelle Obama est-elle l'épouse de Barack Obama?	Michelle Obama, épouse, Barack Obama
									nl	Is Michelle Obama de vrouw van Barack Obama?	Michelle Obama, vrouw van, Barack Obama
									hi_IN	क्या बराक ओबामा की पत्नी मिशेल ओबामा हैं?	बराक ओबामा, पत्नी, मिशेल ओबामा
			145	number	false	true	false		en	What is the area code of Berlin?	Berlin, area code		PREFIX dbo: <http://dbpedia.org/ontology/> PREFIX res: <http://dbpedia.org/resource/> SELECT DISTINCT ?string WHERE { res:Berlin dbo:areaCode ?string . }			c										literal	030
									pt_BR	Qual é o código de área de Berlin?	código de área, Berlin
									de	Was ist die Vorwahl von Berlin?	Berlin, Vorwahl
									es	¿Cuál es el prefijo de Berlin?	prefijo, Berlin
									it	Qual è il prefisso di Berlino?	prefisso, Berlino
									fr	Quel est l'indicatif téléphonique de Berlin?	indicatif téléphonique, Berlin
									nl	Wat is het kengetal van Berlijn?	kengetal, Berlijn
									hi_IN	बर्लिन का क्षेत्र कोड क्या है?	बर्लिन, क्षेत्र कोड
			146	resource	false	true	false		en	Give me all actors starring in Last Action Hero.	actor, starring, Last Action Hero		PREFIX dbo: <http://dbpedia.org/ontology/> PREFIX res: <http://dbpedia.org/resource/> SELECT DISTINCT ?uri WHERE { res:Last_Action_Hero dbo:starring ?uri . }			uri							uri	http://dbpedia.org/resource/Tom_Noonan
									pt_BR	Liste todos os atores que atuaram em Last Action Hero.	atores, atuaram, Last Action Hero												uri	http://dbpedia.org/resource/F._Murray_Abraham
									de	Gib mir alle Schauspieler, die in Last Action Hero mitgespielt haben.	Schauspieler, mitspielen, Last Action Hero												uri	http://dbpedia.org/resource/Arnold_Schwarzenegger
									es	Dame todos los actores que hayan actuado en Last Action Hero.	actores, Last Action Hero												uri	http://dbpedia.org/resource/Bridgette_Wilson
									it	Dammi tutti gli attori che hanno recitato in Last Action Hero.	attori, Last Action Hero												uri	http://dbpedia.org/resource/Charles_Dance
									fr	Noem alle acteurs uit de film Last Action Hero.	acteurs, Last Action Hero												uri	http://dbpedia.org/resource/Art_Carney
									nl	Noem alle acteurs uit de film Last Action Hero.	acteur, Last Action Hero												uri	http://dbpedia.org/resource/Austin_O'Brien
									hi_IN	मुझे लास्ट एक्शन हीरो में अभिनीत सभी कलाकारों के नाम बतायें दो।	लास्ट एक्शन हीरो, सभी कलाकार, नाम												uri	http://dbpedia.org/resource/Robert_Prosky
									ro	Dă-mi toți actorii cu roluri principale în Last Action Hero.	actor, rol principal, Last Action Hero												uri	http://dbpedia.org/resource/Anthony_Quinn
			147	string	false	true	false		en	What are the nicknames of San Francisco?	San Francisco, nickname		SELECT DISTINCT ?string WHERE { <http://dbpedia.org/resource/San_Francisco> <http://dbpedia.org/property/nickname> ?string . }			string													literal	The City by the Bay; Fog City; San Fran; Frisco ; The City that Knows How ; Baghdad by the Bay ; The Paris of the West
									pt_BR	Quais são os apelidos de San Francisco?	apelido, San Francisco
									fa	اسم های مستعار سانفرانسیسکو چیست؟	اسم های مستعار، سانفرانسیسکو
									de	Was sind die Spitznamen von San Francisco?	San Francisco, Spitzname
									es	¿Cuál es el apodo de San Francisco?	San Francisco, apodo
									it	Quali sono i soprannomi di San Francisco?	San Francisco, soprannome
									fr	Quels sont les surnoms de San Francisco?	surnoms, San Francisco
									nl	Wat zijn bijnamen van San Francisco?	bijnaam, San Francisco
									hi_IN	सैन फ्रांसिस्को के उपनाम क्या हैं?	सैन फ्रांसिस्को, उपनाम
									ro	Care sunt poreclele pentru San Francisco?	San Francisco, poreclă
			148	resource	true	true	false		en	What was the first Queen album?	first album, Queen		SELECT DISTINCT ?uri WHERE { ?uri a <http://dbpedia.org/ontology/Album> . ?uri <http://dbpedia.org/ontology/artist> <http://dbpedia.org/resource/Queen_(band)> . ?uri <http://dbpedia.org/ontology/releaseDate> ?d . } ORDER BY ASC(?d) OFFSET 0 LIMIT 1			uri							uri	http://dbpedia.org/resource/Queen_(Queen_album)
									pt_BR	Qual foi o primeiro álbum do Queen?	primeiro álbum, Queen
									fa	اولین آلبوم کوئین چه بود؟	اولین، آلبوم، کوئین
									de	Was war das erste Queen-Album?	erstes Queen-Album
									es	¿Cuál fue el primer álbum de Queen?	primer álbum, Queen
									it	Qual è stato il primo album dei Queen?	primo album, Queen
									fr	Quel est le premier album de Queen?	premier album, Queen
									nl	Wat was het eerste Queen-album?	eerste Queen-album
									hi_IN	सबसे पहला क्वीन एल्बम क्या था?	सबसे पहला, क्वीन एल्बम
									ro	Care a fost primul album Queen?	primul album, Queen
			149	resource	false	false	false		en	Through which countries does the Yenisei river flow?	Yenisei river, flow through, country		PREFIX res: <http://dbpedia.org/resource/> PREFIX dbp: <http://dbpedia.org/property/> SELECT DISTINCT ?uri WHERE { res:Yenisei_River dbp:country ?uri . }			uri							uri	http://dbpedia.org/resource/Russia
									pt_BR	Por quais países o rio Yenisei passa?	país, passa, rio Yenisei												uri	http://dbpedia.org/resource/Mongolia
									de	Durch welche Länder fließt der Yenisei?	Yenisei, fließen, Land
									es	¿Por qué países fluye el río Yenisei?	países, fluye, río Yenisei
									it	Attraverso quali stati scorre il fiume Yenisei?	fiume Yenisei, scorrere attraverso, stato
									fr	Quels sont les pays traversés par l'Ienisseï?	Ienisseï, pays traversés
									nl	Door welke landen stroomt de Jenisej?	Jenisej, land, stroomt door
									hi_IN	किस देश के माध्यम से यनेसी नदी का प्रवाह होता है?	देश, यनेसी नदी, प्रवाह
			150	resource	false	true	false		en	Which television shows were created by Walt Disney?	television show, create, Walt Disney		PREFIX dbo: <http://dbpedia.org/ontology/> PREFIX res: <http://dbpedia.org/resource/> PREFIX rdf: <http://www.w3.org/1999/02/22-rdf-syntax-ns#> SELECT DISTINCT ?uri WHERE { ?uri rdf:type dbo:TelevisionShow . ?uri dbo:creator res:Walt_Disney . }			uri							uri	http://dbpedia.org/resource/List_of_Jiminy_Cricket_educational_serials
									pt_BR	Quais séries de televisão foram criadas por Walt Disney?	série, televisão, criada, Walt Disney												uri	http://dbpedia.org/resource/Walt_Disney_anthology_television_series
									de	Welche Fernsehserien hat Walt Disney entworfen?	Fernsehserie, entwerfen, Walt Disney												uri	http://dbpedia.org/resource/The_Mickey_Mouse_Club
									es	¿Qué series televisivas ideó Walt Disney?	serie televisica, ideó, Walt Disney
									it	Quali serie televisive sono state create dalla Walt Disney?	serie televisiva, ideata, Walt Disney?
									fr	Quelles séries télevisées ont été créées par Walt Disney?	séries télevisées, créées, Walt Disney
									nl	Welke televisieseries werden bedacht door Walt Disney?	televisieserie, bedacht, Walt Disney
									hi_IN	वॉल्ट डिज़नी द्वारा किस टेलीविज़न शो का निर्माण किया गया था?	वॉल्ट डिज़नी, टेलीविज़न शो, निर्माण
			151	resource	true	true	false		en	What is the bridge with the longest span?	bridge, longest span		PREFIX dbo: <http://dbpedia.org/ontology/> PREFIX res: <http://dbpedia.org/resource/> PREFIX rdf: <http://www.w3.org/1999/02/22-rdf-syntax-ns#> SELECT DISTINCT ?uri WHERE { ?uri rdf:type dbo:Bridge . ?uri dbo:mainspan ?s . } ORDER BY DESC(?s) OFFSET 0 LIMIT 1			uri							uri	http://dbpedia.org/resource/Overseas_Highway
									pt_BR	Qual a ponte mais comprida?	Ponte, mais comprida
									de	Welche Brücke hat die längste Spannweite?	Brücke, längste Spannweite
									es	¿Qué puente tiene el mayor largo del vano?	puente, mayor largo del vano
									it	Qual è il ponte con la campata più lunga?	ponte, campata più lunga
									fr	Quel est le pont le plus large?	pont, le plus large
									nl	Wat is de brug met de grootste spanwijdte?	brug, langste spanwijdte
									hi_IN	सबसे लंबा पुल कौन सा है?	सबसे लंबा, पुल
									ro	Care este podul cu cea mai mare deschidere?	pod, cea mai mare deschidere
			152	resource	false	true	false		en	What country is Sitecore from?	country, Sitecore		SELECT DISTINCT ?uri WHERE { <http://dbpedia.org/resource/Sitecore> <http://dbpedia.org/ontology/foundationPlace> ?uri . }			uri							uri	http://dbpedia.org/resource/Denmark
									pt_BR	De que país é a Sitecore	país, Sitecore
									fa	سایتکور در کدام کشور تأسیس شد؟	سایتکور، کشور، تأسیس
									de	Aus welchem Land kommt Sitecore?	Sitecore, Land
									es	¿De qué país es Sitecore?	país origen, Sitecore
									it	Di che nazione è Sitecore?	nazione, Sitecore
									fr	Quel est le pays d'origine de Sitecore?	pays, Sitecore
									nl	Uit welke land komt Sitecore?	land, Sitecore
									hi_IN	साइटकोर कौन से देश से है?	साइटकोर, देश
									ro	Din ce țară este Sitecore?	țară, Sitecore
			153	resource	false	true	false		en	Whom did Lance Bass marry?	wife, Lance Bass		SELECT DISTINCT ?uri WHERE { ?uri <http://dbpedia.org/ontology/spouse> <http://dbpedia.org/resource/Lance_Bass> . }			uri							uri	http://dbpedia.org/resource/Michael_Turchin
									pt_BR	Com quem Lance Bass casou-se?	esposa, Lance Bass
									fa	لنس بس با چه کسی ازدواج کرده است؟	لنس بس، ازدواج
									de	Wen hat Lance Bass geheiratet?	Lance Bass, Ehemann
									es	¿Con quien se casó Lance Bass?	esposa, Lance Bass
									it	Chi ha sposato Lance Bass?	moglie, Lance Bass
									fr	Qui est l'épouse de Lance Bass?	épouse, Lance Bass
									nl	Wie heeft Lance Baas getrouwd?	Lance Baas, getrouwd
									hi_IN	लांस बास ने किससे शादी की?	लांस बास, शादी
									ro	Cu cine s-a căsătorit Lance Bass?	soție, Lance Bass
			154	resource	false	true	false		en	What is the capital of Canada?	capital, Canada		PREFIX dbo: <http://dbpedia.org/ontology/> PREFIX res: <http://dbpedia.org/resource/> SELECT DISTINCT ?uri WHERE { res:Canada dbo:capital ?uri . }			uri							uri	http://dbpedia.org/resource/Ottawa
									pt_BR	Qual a capital do Canadá?	capital, Canadá
									de	Was ist die Hauptstadt von Kanada?	Hauptstadt, Kanada
									es	¿Cuál es la capital de Canadá?	capital, Canadá
									it	Qual è la capitale del Canada?	capitale, Canada
									fr	Quelle est la capitale du Canada?	capitale, Canada
									nl	Wat is de hoofdstad van Canada?	hoofdstad, Canada
									hi_IN	कनाडा की राजधानी क्या है?	कनाडा, राजधानी
			155	resource	false	true	false		en	Who was Vincent van Gogh inspired by?	person, inspiring, Vincent van Gogh		SELECT DISTINCT ?uri WHERE { ?uri <http://dbpedia.org/ontology/influenced> <http://dbpedia.org/resource/Vincent_van_Gogh> . }			uri							uri	http://dbpedia.org/resource/Adolphe_Monticelli
									pt_BR	Em quem Vincent van Gogh inspirou-se?	inspiração, Vincent van Gogh												uri	http://dbpedia.org/resource/Anton_Mauve
									fa	ونسان ون گوگ از چه کسی الهام گرفته است؟	ونسان ون گوگ، الهام
									de	Wer hat Vincent van Gogh inspiriert?	Vincent van Gogh, Inspiration
									es	¿Quién inspiro a Vincent van Gogh?	persona, inpiracion, Vincent van Gogh
									it	Da chi fu inspirato Vincent van Gogh?	persona, ispirare, Vincent van Gogh
									fr	Qui a inspiré Victor van Gogh?	inspiration, Victor van Gogh
									nl	Wie heeft van Gogh geinspireerd?	van Gogh, geinspireerd
									hi_IN	विंसेंट वैन गाग किनसे प्रेरित थे ?	विंसेंट वैन गाग, प्रेरित
									ro	De către cine a fost Vincent van Gogh inspirat?	persoană, inspirație, Vincent van Gogh
			156	resource	false	true	false		en	In which city did John F. Kennedy die?	city, John F. Kennedy, die		PREFIX dbo: <http://dbpedia.org/ontology/> PREFIX res: <http://dbpedia.org/resource/> PREFIX rdf: <http://www.w3.org/1999/02/22-rdf-syntax-ns#> SELECT DISTINCT ?uri WHERE { res:John_F._Kennedy dbo:deathPlace ?uri . ?uri rdf:type dbo:City . }			uri							uri	http://dbpedia.org/resource/Dallas
									pt_BR	Em que cidade John F. Kennedy morreu?	cidade, John F. Kennedy, morte
									de	In welcher Stadt ist John F. Kennedy gestorben?	Stadt, John F. Kennedy, gestorben
									es	¿En qué ciudad murió John F. Kennedy?	cuidad, John F. Kennedy, murió
									it	In quale città morì John F. Kennedy?	città, John F. Kennedy, morto
									fr	Dans quelle ville est mort John F. Kennedy?	ville, John F. Kennedy
									nl	In welke stad kwam John F. Kennedy om het leven?	stad, John F. Kennedy, gestorven
									hi_IN	किस शहर में जॉन एफ कैनेडी का निधन हुआ ?	शहर, जॉन एफ कैनेडी, निधन
			157	boolean	false	true	false		en	Was U.S. president Jackson involved in a war?	U.S. president, Jackson, war		PREFIX dbo: <http://dbpedia.org/ontology/> PREFIX res: <http://dbpedia.org/resource/> ASK WHERE { res:Andrew_Jackson dbo:battle ?battle . }																					true
									pt_BR	O presidente Jackson dos EUA envolveu-se em uma guerra?	presidente, Jackson, EUA
									de	War US-Präsident Jackson in einen Krieg verwickelt?	US-Präsident, Jackson, Krieg
									es	¿Estuvo el el presidente de los estados unidos Jackson involucrado en una guerra?	presidente de los estados unidos, Jackson, guerra
									it	Il presidente degli Stati Uniti Jackson è stato coinvolto in una guerra?	presidente degli Stati Uniti, Jackson, guerra
									fr	Le président Jackson a-t-il participé à une guerre?	président Jackson, guerre, participé
									nl	Was president Jackson van de Verenigde Staten betrokken bij een oorlog?	president van de Verenigde Staten, Jackson, oorlog, betrokken bij
									hi_IN	क्या अमेरिका के राष्ट्रपति जैक्सन किसी युद्ध में शामिल थे?	अमेरिका, राष्ट्रपति जैक्सन, युद्ध
			158	resource	false	true	false		en	Who wrote the Game of Thrones theme?	writer, Game of Thrones		SELECT DISTINCT ?uri WHERE { <http://dbpedia.org/resource/Game_of_Thrones> <http://dbpedia.org/ontology/composer> ?uri. }			uri							uri	http://dbpedia.org/resource/Ramin_Djawadi
									pt_BR	Quem escreveu o tema do Game of Thrones?	escritor, tema, Game of Thrones
									fa	طرح بازی تاج و تخت را چه کسی نوشت؟	طرح، بازی تاج و تخت، نوشت
									de	Wer hat das Titellied für Games of Thrones geschrieben?	Game of Thrones, Titellied, Autor
									es	¿Quién escribió el tema del Juego de Tronos?	escritor, tema Juego de Tronos
									it	Chi ha scritto Game of Thrones?	scrittore, Game of Thrones
									fr	Qui a écrit le thème de Game of Thrones?	compositeur, thème, Game of Thrones
									nl	Wie heeft de titelmuziek van Game of Thrones gekomponeerd?	titelmuziek, Game of Thrones, componist
									hi_IN	गेम ऑफ़ थ्रोन्स थीम किसने लिखी हैं ?	गेम ऑफ़ थ्रोन्स, थीम, लिखी
									ro	Cine a scris tema din Urzeala Tronurilor?	scriitor, Urzeala Tronurilor
			159	resource	false	true	false		en	Who designed the Brooklyn Bridge?	Brooklyn Bridge, design		PREFIX res: <http://dbpedia.org/resource/> PREFIX dbo: <http://dbpedia.org/ontology/> SELECT DISTINCT ?uri WHERE { res:Brooklyn_Bridge dbo:architect ?uri . }			uri							uri	http://dbpedia.org/resource/John_A._Roebling
									pt_BR	Quem projetou a Ponte do Brooklin?	projetou, Ponte do Brooklyn
									de	Wer hat die Brooklyn Bridge entworfen?	Brooklyn Bridge, entwerfen
									es	¿Quién diseñó la Brooklyn Bridge?	diseñador, Brooklyn Bridge
									it	Chi ha progettato il ponte di Brooklyn?	ponte di Brooklyn, progettare
									fr	Qui a conçu le pont de Brooklyn?	pont de Brooklyn, conçu
									nl	Wie ontwierp de Brooklyn Bridge?	ontwerp, Brooklyn Bridge
									hi_IN	ब्रुकलिन ब्रिज को किसने बनाया है?	ब्रुकलिन ब्रिज, बनाया
									ro	Cine a proiectat podul din Brooklyn?	podul din Brooklyn, proiecta
			160	date	false	true	false		en	When did Boris Becker end his active career?	Boris Becker, end career		SELECT DISTINCT ?d WHERE { <http://dbpedia.org/resource/Boris_Becker> <http://dbpedia.org/ontology/activeYearsEndDate> ?d . }			date				literal	1999-06-25
									pt_BR	Quando Boris Becker encerrou sua carreira?	Borix Becker, encerrou, carreira
									fa	بوریس بکر کی به فعالیت هنری اش خاتمه داد؟	بوریس بکر، فعالیت حرفه ای، خاتمه
									de	Wann hat Boris Becker seine aktive Karriere beendet?	Boris Becker, aktive Karriere, beendet
									es	¿Cuándo termino Boris Becker su carrera como actor?	fin carrera, actor Boris Becker
									it	Boris Becker quando ha concluso la sua carriera?	Boris Becker, fine, carriera
									fr	Quelle est la date de terminaison de la carrière de Boris Becker?	Date de terminaison, carrière, Boris Becker
									nl	Wanneer stopte Boris Becker zijn actieve loopbaan?	Boris Becker, actieve loopbaan, einde
									hi_IN	बोरिस बेकर ने अपना सक्रिय कैरियर कब समाप्त किया?	बोरिस बेकर, सक्रिय कैरियर, समाप्त
									ro	Când și-a încheiat Boris Becker cariera activă?	încheia cariera, Boris Becker
			161	resource	false	true	false		en	Which types of grapes grow in Oregon?	grape types, grow, Oregon		SELECT DISTINCT ?uri WHERE { <http://dbpedia.org/resource/Oregon_wine> <http://dbpedia.org/ontology/growingGrape> ?uri . }			uri							uri	http://dbpedia.org/resource/Chenin_blanc
									pt_BR	Que tipos de uvas crescem no Oregon?	tipos de uva, cresce, Oregon												uri	http://dbpedia.org/resource/Pinot_Meunier
									fa	چه انواعی از انگور در اورگن رشد می کند؟	انواعی انگور، اورگن، رشد												uri	http://dbpedia.org/resource/Muscat_Blanc_à_Petits_Grains
									de	Welche Traubenarten wachsen in Oregon?	Traubenarten, wachsen, Oregon												uri	http://dbpedia.org/resource/Riesling
									es	¿Que tipo de uva crece en Oregon?	tipo uva, crece, Oregon												uri	http://dbpedia.org/resource/Carmine
									it	Quali tipi di uva crescono in Oregon?	tipi di uva, crescere, Oregon												uri	http://dbpedia.org/resource/Grenache
									fr	Quelles genres de raisin poussent en Oregon?	genres, raisins, Oregon												uri	http://dbpedia.org/resource/Zinfandel
									nl	Welke soorten druiven groeien in Oregon?	soorten druiven, groeien, Oregon												uri	http://dbpedia.org/resource/Léon_Millot
									hi_IN	ओरेगन में किस प्रकार के अंगूर उगते हैं?	ओरेगन, प्रकार, अंगूर, उगते												uri	http://dbpedia.org/resource/Dolcetto
									ro	Ce soiuri de struguri cresc în Oregon?	soiuri de struguri, cresc, Oregon												uri	http://dbpedia.org/resource/Malbec
																							uri	http://dbpedia.org/resource/Cabernet_Sauvignon
																							uri	http://dbpedia.org/resource/Pinot_gris
																							uri	http://dbpedia.org/resource/Melon
																							uri	http://dbpedia.org/resource/Merlot
																							uri	http://dbpedia.org/resource/Gamay
																							uri	http://dbpedia.org/resource/Sauvignon_blanc
																							uri	http://dbpedia.org/resource/Muscat_(grape)
																							uri	http://dbpedia.org/resource/Chardonnay
																							uri	http://dbpedia.org/resource/Huxelrebe
																							uri	http://dbpedia.org/resource/Sangiovese
																							uri	http://dbpedia.org/resource/Sémillon
																							uri	http://dbpedia.org/resource/Gewürztraminer
																							uri	http://dbpedia.org/resource/Müller-Thurgau
																							uri	http://dbpedia.org/resource/Pinot_blanc
																							uri	http://dbpedia.org/resource/Pinot_noir
																							uri	http://dbpedia.org/resource/Black_Muscat
																							uri	http://dbpedia.org/resource/Baco_noir
																							uri	http://dbpedia.org/resource/Marechal_Foch
																							uri	http://dbpedia.org/resource/Petit_Verdot
																							uri	http://dbpedia.org/resource/Cabernet_Franc
																							uri	http://dbpedia.org/resource/Viognier
																							uri	http://dbpedia.org/resource/Scheurebe
																							uri	http://dbpedia.org/resource/Syrah
																							uri	http://dbpedia.org/resource/Barbera
			162	number	false	true	false		en	How tall is Michael Jordan?	tall, Michael Jordan		PREFIX dbo: <http://dbpedia.org/ontology/> PREFIX res: <http://dbpedia.org/resource/> SELECT DISTINCT ?num WHERE { res:Michael_Jordan dbo:height ?num . }			c										literal	1.9812
									pt_BR	Qual a altura de Michael Jordan?	altura, Michael Jordan
									de	Wie groß ist Michael Jordan?	groß, Michael Jordan
									es	¿Qué altura tiene Michael Jordan?	altura, Michael Jordan
									it	Quanto è alto Michael Jordan?	altezza, Michael Jordan
									fr	Quelle est la taille de Michael Jordan?	taille, Michael Jordan
									nl	Hoe lang is Michael Jordan?	lang, Michael Jordan
									hi_IN	माइकल जॉर्डन कितना लंबा है?	माइकल जॉर्डन, लंबा
			163	resource	false	true	false		en	To which party does the mayor of Paris belong?	party, mayor, Paris, belong		SELECT DISTINCT ?uri WHERE { <http://dbpedia.org/resource/Paris> <http://dbpedia.org/ontology/mayor> ?x . ?x <http://dbpedia.org/ontology/party> ?uri . }			uri							uri	http://dbpedia.org/resource/Socialist_Party_(France)
									pt_BR	A que partido o prefeito de Paris pertence?	partido, pertence, prefeito, Paris
									fa	شهردار پاریس عضو چه حزبی است؟	شهردار پاریس، حزب
									de	Welcher Partei gehört die Bürgermeisterin von Paris an?	Paris, Bürgermeisterin, Partei
									es	¿A qué partido politico pertenece el alcalde de París?	partido politico, alcalde de París
									it	A quale partito polito appartiene il sindaco di Parigi?	partito politico, sindaco di Parigi, appartiene
									fr	Quel est le parti politique du maire de Paris?	parti politique, maire, Paris
									nl	Tot welke partij behoort de burgemeester van Parijs?	partij, burgemeester, Parijs
									hi_IN	पेरिस के महापौर किस पार्टी के हैं?	पेरिस, महापौर, पार्टी
									ro	Cărui partid aparține primarul Parisului?	partid, primarul Parisului, aparține
			164	resource	false	true	false		en	Who wrote the book The Pillars of the Earth?	wrote, book, The pillars of the Earth		PREFIX dbo: <http://dbpedia.org/ontology/> PREFIX res: <http://dbpedia.org/resource/> SELECT DISTINCT ?uri WHERE { res:The_Pillars_of_the_Earth dbo:author ?uri . }			uri							uri	http://dbpedia.org/resource/Ken_Follett
									pt_BR	Quem escreveu o livro Os Pilares da Terra?	schreiben, Buch, Die Säulen der Erde
									de	Wer schrieb das Buch Die Säulen der Erde?	schreiben, Buch, Die Säulen der Erde
									es	¿Quen escribió el libro Los pilares de la Tierra?	escritor, libro, Pilares de la Tierra
									it	Chi ha scritto il libro I pilastri della Terra?	scritto, libro, I pilastri della Terra
									fr	Qui a écrit le livre Les Piliers de la Terre?	Les Piliers de la Terre, écrivain
									nl	Wie schreef het boek De Pilaren van de Aarde?	auteur, De Pilaren van de Aarde
									hi_IN	किसने द पिल्लर्स ऑफ द अर्थ किताब को लिखा हैं ?	द पिल्लर्स ऑफ द अर्थ, किताब, लिखा
									ro	Cine e scris cartea Stâlpii Pământului?	scrie, carte, Stâlpii Pământului
			165	resource	false	true	false		en	Who was the 16th president of the United States?	United States, 16th president		PREFIX dbo: <http://dbpedia.org/ontology/> PREFIX rdf: <http://www.w3.org/1999/02/22-rdf-syntax-ns#> SELECT DISTINCT ?uri WHERE { ?uri dbo:office 'President of the United States' . ?uri dbo:orderInOffice '16th' . }			uri							uri	http://dbpedia.org/resource/Abraham_Lincoln
									pt_BR	Quem foi o 16o presidente dos Estados Unidos?	16o presidente, Estados Unidos
									de	Wer war der 16. Präsident der Vereinigten Staaten?	Vereinigte Staaten, 16. Präsident
									es	¿Quién fue el 16th presidente de los Estados Unidos?	estados unidos, primer presidente
									it	Chi è stato il sedicesimo presidente degli Stati Uniti?	Stati Uniti, sedicesimo presidente
									fr	Qui fut le premier président des États-Unis?	Etats-Unis, premier président
									nl	Wie was de 16de president van de Verenigde Staten?	Verenigde Staten, 16de president
									hi_IN	संयुक्त राज्य के 16 वें राष्ट्रपति कौन थे?	संयुक्त राज्य, 16 वें राष्ट्रपति
									ro	Cine a fost primul președinte al Statelor Unite?	Statele Unite, primul președinte
			166	number	false	true	false		en	How high is the Mount Everest?	Mount Everest, high		PREFIX dbo: <http://dbpedia.org/ontology/> PREFIX res: <http://dbpedia.org/resource/> SELECT DISTINCT ?num WHERE { res:Mount_Everest dbo:elevation ?num. }			c										literal	8848.0
									pt_BR	Qual a altura do Monte Everest?	altura, Monte Everest
									de	Wie hoch ist der Mount Everest?	Mount Everest, hoch
									es	¿Qué alto es el Monte Everest?	Monte Everest, altura
									it	Quanto è alto il Monte Everest?	Monte Everest, altezza
									fr	Quelle est l'altitude du Mont Everest?	altitude, Mont Everest
									nl	Hoe hoog is de Mount Everest?	hoogte, Mount Everest
									hi_IN	माउंट एवरेस्ट कितना ऊँचा है?	माउंट एवरेस्ट, ऊँचा
			167	resource	false	true	false		en	Who was the doctoral supervisor of Albert Einstein?	doctoral supervisor, Albert Einstein		SELECT DISTINCT ?uri WHERE { <http://dbpedia.org/resource/Albert_Einstein> <http://dbpedia.org/ontology/doctoralAdvisor> ?uri . }			uri							uri	http://dbpedia.org/resource/Alfred_Kleiner
									pt_BR	Quem foi o orientador do doutorado de Albert Einstein?	orientador, doutorado, Albert Einstein
									fa	چه کسی استاد راهنمای دکترای آلبرت اینشتین بود؟	استاد راهنما، دکترا، آلبرت اینشتین
									de	Wer war der Doktorvater von Albert Einstein?	Doktorvater, Albert Einstein
									es	¿Quien es el supervisor de doctorado de Albert Einstein?	supervisor doctoral, Albert Einstein
									it	Chi era il supervisore della tesi di dottorato di Albert Einstein?	supervisore della tesi di dottorato, Albert Einstein
									fr	Qui était le directeur de thèse d'Albert Einstein	directeur, these, Albert Einstein
									nl	Wie was de promotor van Albert Einsteins doctoraatsonderzoek?	Albert Einstein, promotor
									hi_IN	अल्बर्ट आइंस्टीन के डॉक्टरेट के पर्यवेक्षक कौन थे?	अल्बर्ट आइंस्टीन, डॉक्टरेट, पर्यवेक्षक
									ro	Cine a fost conducătorul de doctorat al lui Albert Einstein?	conducător de doctorat, Albert Einstein
			168	resource	false	true	false		en	In which city does Sylvester Stallone live?	city, live, Sylvester Stallone		SELECT DISTINCT ?uri WHERE { ?uri a <http://dbpedia.org/ontology/City> . <http://dbpedia.org/resource/Sylvester_Stallone> <http://dbpedia.org/ontology/residence> ?uri . }			uri							uri	http://dbpedia.org/resource/Beverly_Hills,_California
									pt_BR	Em que cidade Sylvester Stallone mora?	cidade, Silvester Stallone, vive
									fa	سیلوستر استالونه در کدام شهر زندگی می کند؟	سیلوستر استالونه، شهر، زندگی
									de	In welcher Stadt wohnt Sylvester Stallone?	Sylvester Stallone, wohnen, Stadt
									es	¿En qué ciudad vive Sylvester Stallone?	ciudad, vive, Sylvester Stallone
									it	In quale città vive Sylvester Stallone?	città, vive, Sylvester Stallone
									fr	Dans quelle ville vit Sylvester Stallone?	ville, Sylvester Stallone
									nl	In welke stad woont Sylvester Stallone?	stad, wonen, Sylvester Stallone
									hi_IN	सिल्वेस्टर स्टेलोन किस शहर में रहते हैं?	सिल्वेस्टर स्टेलोन, शहर, रहते
									ro	În ce oraș trăiește Sylvester Stallone?	oraș, trăiește, Sylvester Stallone
			169	resource	false	true	false		en	What is the currency of the Czech Republic?	Czech republic, currency		PREFIX dbo: <http://dbpedia.org/ontology/> PREFIX res: <http://dbpedia.org/resource/> SELECT DISTINCT ?uri WHERE { res:Czech_Republic dbo:currency ?uri . }			uri							uri	http://dbpedia.org/resource/Czech_koruna
									pt_BR	Qual a moeda da República Tcheca?	moeda, República Tcheca
									de	Was ist die Währung der Tschechischen Republik?	Tschechischen Republik, Währung
									es	¿Cuál es la moneda de la república checa?	moneda, república checa
									it	Qual è la valuta della Repubblica Ceca?	valuta, Repubblica Ceca
									fr	Quel est la devise de la Tchéquie?	devise, Tchéquie
									nl	Wat is de munteenheid van Tsjechië?	Tsjechië, munteenheid
									hi_IN	चेक गणराज्य की मुद्रा क्या है?	चेक गणराज्य, मुद्रा
			170	boolean	false	true	false		en	Did Socrates influence Aristotle?	Socrates, influence, Aristotle		PREFIX dbo: <http://dbpedia.org/ontology/> PREFIX res: <http://dbpedia.org/resource/> ASK WHERE { res:Aristotle dbo:influencedBy res:Socrates . }																					true
									pt_BR	Sócrates influenciou Aristóteles?	Sócrates, influência, Aristóteles
									de	Hat Sokrates Aristoteles beeinflusst?	Sokrates, beeinflussen, Aristoteles
									es	¿Tuvo Sócrates influencia sobre Aristóteles?	Sócrates, influencia, Aristóteles
									it	Socrate ha influenzato Aristotele?	Socrate, influenzare, Aristotele
									fr	Socrate a-t-il influencé Aristote?	Socrate, influencer, Aristote
									nl	Beïnvloedde Socrates Aristoteles?	beïnvloeden, Socrates, Aristoteles
									hi_IN	क्या एरिस्टोटल सोक्रेटस से प्रभावित थे?	एरिस्टोटल, सोक्रेटस, प्रभावित
			171	resource	false	false	false		en	What is the time zone of Salt Lake City?	Salt Lake City, time zone		PREFIX res: <http://dbpedia.org/resource/> PREFIX dbp: <http://dbpedia.org/property/> SELECT DISTINCT ?uri WHERE { res:Salt_Lake_City dbp:timezone ?uri . }			uri							uri	http://dbpedia.org/resource/Mountain_Time_Zone
									pt_BR	Qual o fuso horário de Salt Lake City?	fuso horário, Salt Lake City
									de	In welcher Zeitzone liegt Salt Lake City?	Salt Lake City, Zeitzone
									es	¿En qué zona horaria se encuentra Salt Lake City?	Salt Lake City, zona horaria
									it	In quale fuso orario si trova Salt Lake City?	Salt Lake City, fuso orario
									fr	Quel est le fuseau horaire de Salt Lake City?	fuseau horaire, Salt Lake City
									nl	In welke tijdzone ligt Salt Lake City?	Salt Lake City, tijdzone
									hi_IN	साल्ट लेक सिटी का समय क्षेत्र क्या है?	साल्ट लेक सिटी, समय क्षेत्र
			172	resource	false	true	false		en	Who is the son of Sonny and Cher?	son, Sonny and Cher		SELECT DISTINCT ?uri WHERE { ?uri <http://dbpedia.org/ontology/parent> <http://dbpedia.org/resource/Cher> . ?uri <http://dbpedia.org/ontology/parent> <http://dbpedia.org/resource/Sonny_Bono> . }			uri							uri	http://dbpedia.org/resource/Chaz_Bono
									pt_BR	Quem é o filho de Sonny e Cher?	filho, Sonny, Cher
									fa	پسر سونی و چر چه کسی بود؟	پسر، سونی و چر
									de	Wer ist der Sohn von Sonny und Cher?	Sonny, Cher, Sohn
									es	¿Quién es el hijo de Sonny y Cher?	hijo, Sonny y Cher?
									it	Chi è il figlio di Sonny e Cher	figlio, Sonny e Cher
									fr	Qui est le fils de Sonny et Cher?	fils, Sonny, Cher
									nl	Wie is de zoon van Sonny en Cher?	zoon, Sonny, Cher
									hi_IN	सोनि और चेर का बेटा कौन है?	सोन, चेर, बेटा
									ro	Cine este fiul lui Sonny și Cher?	fiu, Sonny și Cher
			173	resource	false	true	false		en	In which city are the headquarters of the United Nations?	city, headquarters of the United Nations		SELECT DISTINCT ?uri WHERE { <http://dbpedia.org/resource/Headquarters_of_the_United_Nations> <http://dbpedia.org/ontology/location> ?uri . ?uri a <http://dbpedia.org/ontology/City> . }			uri							uri	http://dbpedia.org/resource/New_York_City
									pt_BR	Em que cidade está a sede das Nações Unidas?	cidade, sede, Nações Unidas
									fa	مقر سازمان ملل در کدام شهر قرار دارد؟	مقر، سازمان ملل، شهر
									de	In welcher Stadt ist das Hauptquartier der Vereinten Nationen?	Vereinte Nationen, Hauptquartier, Stadt
									es	¿En qué ciudad se encuentra la sede de las Naciones Unidas?	ciudad, la sede de las Naciones Unidas
									it	In quale città si trova il quartier generale delle Nazioni Unite?	città, quartier generale delle Nazioni Unite
									fr	Dans quelle ville se trouvé les quartiers généraux des Nations Unies?	ville, quartiers généraux, Nations Unies?
									nl	In welke stad bevindt zich het hoofdkwartier van de Verenigde Naties?	stad, hoofdkwartier, Verenigde Naties
									hi_IN	संयुक्त राष्ट के मुख्यालय कौन सा शहर में हैं?	संयुक्त राष्ट, मुख्यालय, शहर
									ro	În ce oraș se află cartierul general al Națiunilor Unite?	oraș, cartierul general al Națiunilor Unite
			174	resource	false	true	false		en	Who is the founder of Penguin Books?	founder, Penguin Books		PREFIX dbo: <http://dbpedia.org/ontology/> PREFIX res: <http://dbpedia.org/resource/> PREFIX rdf: <http://www.w3.org/1999/02/22-rdf-syntax-ns#> SELECT DISTINCT ?uri WHERE { res:Penguin_Books dbo:founder ?uri . }			uri							uri	http://dbpedia.org/resource/Allen_Lane
									pt_BR	Quem é o fundador da Penquin Books?	fundador, Penguin Books
									de	Wer hat Penguin Books gegründet?	gegründet, Penguin Books
									es	¿Quien es el fundador de Penguin Books?	fundador, Penguin Books
									it	Chi è il fondatore di Penguin Books?	fondatore, Penguin Books
									fr	Qui est le fondateur de Penguin Books?	fondateur, Penguin Books
									nl	Wie is de oprichter van Penguin Books?	oprichter, Penguin Books
									hi_IN	पेंगुइन बुक्स के संस्थापक कौन हैं?	पेंगुइन बुक्स, संस्थापक
									ro	Cine este fondatorul Penguin Books?	fondator, Penguin Books
			175	date	false	true	false		en	When was Jack Wolfskin founded?	Jack Wolfskin, founded		SELECT DISTINCT ?year WHERE { <http://dbpedia.org/resource/Jack_Wolfskin> <http://dbpedia.org/ontology/foundingYear> ?year . }			date				literal	1981
									pt_BR	Quando foi fundada a Jack Wolfskin?	fundada, Jack Wolfskin
									fa	جک ولفیش کی تأسیس شد؟	جک ولفیش، تأسیس
									de	Wann wurde Jack Wolfskin gegründet?	Jack Wolfskin, gründen
									es	¿Cúando se fundó Jack Wolfskin?	Jack Wolfskin, fundada
									it	Quando è stata fondata Jack Wolfskin?	Jack Wolfskin, fondata
									fr	Quand a été fondé Jack Wolfskin?	fondé, Jack Wolfskin
									nl	Wanneer werd Jack Wolfskin opgericht?	Jack Wolfskin, opgericht
									hi_IN	जैक वुल्फस्किन की स्थापना कब हुई थी?	जैक वुल्फस्किन, स्थापना
									ro	Când a fost fondat Jack Wolfskin?	Jack Wolfskin, fondat
			176	resource	false	true	false		en	Who is the mayor of Rotterdam?	mayor, Rotterdam		PREFIX dbo: <http://dbpedia.org/ontology/> PREFIX res: <http://dbpedia.org/resource/> SELECT DISTINCT ?uri WHERE { res:Rotterdam dbo:leaderName ?uri . }			uri							uri	http://dbpedia.org/resource/Ahmed_Aboutaleb
									pt_BR	Quem é o prefeito de Rotterdam?	prefeito, Rotterdam
									de	Wer ist der Bürgermeister von Rotterdam?	Bürgermeister, Rotterdam
									es	¿Quién es el alcalde de Rotterdam?	alcalde de Rotterdam
									it	Chi è il sindaco di Rotterdam?	sindaco, Rotterdam
									fr	Qui est le maire de Rotterdam?	maire, Rotterdam
									nl	Wie is de burgemeester van Rotterdam?	burgemeester, Rotterdam
									hi_IN	रॉटरडैम के महपौर कौन हैं?	रॉटरडैम, महपौर
									ro	Cine este primar în Rotterdam?	primar, Rotterdam
			177	resource	false	true	false		en	Give me all Swedish oceanographers.	Swedish, oceanographer		PREFIX dbo: <http://dbpedia.org/ontology/> PREFIX res: <http://dbpedia.org/resource/> SELECT DISTINCT ?uri WHERE { ?uri dbo:field res:Oceanography . ?uri dbo:birthPlace res:Sweden . }			uri							uri	http://dbpedia.org/resource/Vagn_Walfrid_Ekman
									pt_BR	Liste todos os oceanógrafos suecos.	oceanógrafos, suecos
									de	Gib mir alle Schwedischen Ozeanographen.	Schwedisch, Ozeanographen
									es	Dame todos los oceanógrafos suecos.	oceanógrafos suecos
									it	Dammi tutti gli oceanografi svedesi.	svedesi, oceanografi
									fr	Donne-moi tous les océanographes suédois.	Océanographes, suédois
									nl	Toon alle Zweedse oceanograafen.	Zweedse, oceanograafen
									hi_IN	मुझे सभी स्वीडिश महासागरीय वैज्ञानिकों की सूचि बतायें।	स्वीडिश, महासागरीय वैज्ञानिक
									ro	Dă-mi toți oceanografii suedezi.	oceanograf, suedez
			178	resource	false	true	false		en	Show me Hemingway's autobiography.	autobiography, Hemingway		SELECT DISTINCT ?uri WHERE { ?uri <http://dbpedia.org/ontology/author> <http://dbpedia.org/resource/Ernest_Hemingway> . ?uri <http://dbpedia.org/ontology/literaryGenre> <http://dbpedia.org/resource/Autobiography> . }			uri							uri	http://dbpedia.org/resource/A_Moveable_Feast
									pt_BR	Mostre-me a autobiografia de Hemingway.	autobiografia, Hemingway
									fa	خود زندگی نامه همینگوی را بده.	خود زندگی نامه، همینگوی
									de	Zeig mir Hemmingways Autobiographie.	Hemmingway, Autobiographie
									es	Muéstrame la autobiografía Hemingway.	autobiografía Hemingway
									it	Mostrami l'autobiografia di Hemingway.	autobiorafia, Hemingway
									fr	Montre l'autobiographie de Hemingway.	autobiographie, Hemingway
									nl	Toen de autobiografie van Hemmingway.	Hemmingway, autobiografie
									hi_IN	हेमिंग्वे की आत्मकथा मुझे दिखायें।	हेमिंग्वे, आत्मकथा
									ro	Arată-mi autobiografia lui Hemingway	autobiografie, Hemingway
			179	resource	false	true	false		en	Who are the parents of the wife of Juan Carlos I?	Juan Carlos I, wife, parents		PREFIX dbo: <http://dbpedia.org/ontology/> PREFIX res: <http://dbpedia.org/resource/> SELECT DISTINCT ?uri WHERE { res:Juan_Carlos_I_of_Spain dbo:spouse ?x . ?x dbo:parent ?uri . }			uri							uri	http://dbpedia.org/resource/Frederica_of_Hanover
									pt_BR	Quem são os pais da esposa de Juan Carlos I?	pais, esposa, Juan Carlos I												uri	http://dbpedia.org/resource/Paul_of_Greece
									de	Wer sind die Eltern der Frau von Juan Carlos I?	Juan Carlos I, Frau, Eltern
									es	¿Quién son los padres de la esposa de Juan Carlos I?	padres, esposa, Juan Carlos I
									it	Chi sono i genitori della moglie di Juan Carlos I?	Juan Carlos I, moglie, genitori
									fr	Qui sont les parents de l'épouse de Juan Carlos Ier?	parents, épouse, Juan Carlos Ier
									nl	Hoe heten de ouders van de vrouw van Juan Carlos I?	ouders, vrouw van, Juan Carlos I
									hi_IN	जुआन कार्लोस-१ की पत्नी के माता-पिता कौन हैं?	जुआन कार्लोस-१, पत्नी, माता-पिता
									ro	Cine sunt părinții soției lui Juan Carlos I?	Juan Carlos I, soție, părinți
			180	boolean	false	true	false		en	Did Tesla win a nobel prize in physics?	Tesla, nobel prize, physics		PREFIX dbo: <http://dbpedia.org/ontology/> PREFIX res: <http://dbpedia.org/resource/> ASK WHERE { res:Nikola_Tesla dbo:award res:Nobel_Prize_in_Physics . }																					false
									pt_BR	Tesla ganhou um Prêmio Nobel de Física?	Tesla, Prêmio Nobel de Física
									de	Hat Tesla den Nobelpreis für Physik gewonnen?	Tesla, Nobelpreis, Physik
									es	¿Obtuvo Tesla el premio nobel de física?	Tesla, premio nobel, física
									it	Tesla ha vinto un premio Nobel per la fisica?	Tesla, premio nobel, fisica
									fr	Tesla a-t-il recu le prix Nobel?	Tesla, recu, prix Nobel
									nl	Heeft Tesla ooit de Nobelprijs voor de Natuurkunde gewonnen?	Nobelprijs voor de Natuurkunde, Tesla
									hi_IN	क्या टेस्ला ने भौतिक विज्ञान में नोबेल पुरस्कार जीता?	टेस्ला, भौतिक विज्ञान, नोबेल पुरस्कार
			181	resource	true	true	false		en	Who is the tallest basketball player?	tallest, basketball player		SELECT DISTINCT ?uri WHERE { ?uri <http://www.w3.org/1999/02/22-rdf-syntax-ns#type> <http://dbpedia.org/ontology/BasketballPlayer> . ?uri <http://dbpedia.org/ontology/height> ?num . } ORDER BY DESC(?num) OFFSET 0 LIMIT 1			uri							uri	http://dbpedia.org/resource/Thijs_Vermeulen
									pt_BR	Quem é o jogador de basquete mais alto?	jogador de basquete, mais alto
									fa	چه کسی بلندترین بازیکن بسکتبال است؟	بلندترین، بازیکن بسکتبال
									de	Wer ist der größte Basketballspieler?	größter, Basketballspieler
									es	Quien es el jugador de baloncesto mas alto?	jugador baloncesto, mas alto
									it	Chi è il giocatore di pallacanestro più alto?	giocatore di pallacanestro, più alto
									fr	Quel est le plus grand joueur de basket?	plus grand, joueur, basket
									nl	Wie is de grootste basketballer?	grootste, basketballer
									hi_IN	सबसे लंबा बास्केटबॉल खिलाड़ी कौन है?	सबसे लंबा, बास्केटबॉल, खिलाड़ीै
									ro	Cine este cel mai înalt jucător de basket?	cel mai înalt, jucător de basket
			182	resource	true	true	false		en	Which city has the least inhabitants?	city, the least inhabitants		SELECT DISTINCT ?uri WHERE { ?uri <http://www.w3.org/1999/02/22-rdf-syntax-ns#type> <http://dbpedia.org/ontology/City> . ?uri <http://dbpedia.org/ontology/populationTotal> ?pop . } ORDER BY ASC(?pop) OFFSET 0 LIMIT 1			uri							uri	http://dbpedia.org/resource/Greenhorn,_Oregon
									pt_BR	Qual cidade tem menos habitantes?	cidade, menos habitantes
									fa	چه شهری کمترین سکنه را دارد؟	شهری، کمترین سکنه
									de	Welche Stadt hat die wenigsten Einwohner?	Stadt, wenigsten Einwohner
									es	¿Que ciudad tiene la menor población?	ciudad, menor población
									it	Quale città ha il minor numero di abitanti?	città, minor numero di abitanti
									fr	Quelle ville a le plus petit nombre d'habitants?	ville, plus petit nombre d'habitants
									nl	Welke stad heeft de minste inwoners?	stad, minste inwoners
									hi_IN	सबसे कम निवासियों वाला शहर कौन सा है?	सबसे कम, निवासियों, शहर
									ro	Care oraș are cei mai puțini locuitori?	oraș, cei mai puțini locuitori
			183	boolean	false	true	false		en	Is proinsulin a protein?	proinsulin, protein		PREFIX dbo: <http://dbpedia.org/ontology/> PREFIX res: <http://dbpedia.org/resource/> PREFIX rdf: <http://www.w3.org/1999/02/22-rdf-syntax-ns#> ASK WHERE { res:Proinsulin rdf:type dbo:Protein . }																					true
									pt_BR	A proinsulina é uma proteína?	proinsulina, proteína
									de	Ist Proinsulin ein Protein?	Proinsulin, Protein
									es	¿La proinsulina es una proteina?	proinsulina, protein
									it	a proinsulina è una proteina?	proinsulina, proteina
									fr	La pro-insuline est-elle une protéine?	pro-insuline, protéine
									nl	Is proinsuline een proteïne?	proinsuline, proteïne
									hi_IN	क्या प्रोइन्सुलिन एक प्रोटीन है?	प्रोइन्सुलिन, प्रोटीन
			184	resource	false	true	false		en	Who were the parents of Queen Victoria?	parents, Queen Victoria		PREFIX dbo: <http://dbpedia.org/ontology/> PREFIX res: <http://dbpedia.org/resource/> SELECT DISTINCT ?uri WHERE { res:Queen_Victoria dbo:parent ?uri . }			uri							uri	http://dbpedia.org/resource/Princess_Victoria_of_Saxe-Coburg-Saalfeld
									pt_BR	Quem foram os pais da Rainha Victoria?	pais, Rainha Victoria												uri	http://dbpedia.org/resource/Prince_Edward,_Duke_of_Kent_and_Strathearn
									de	Wer waren die Eltern von Königin Viktoria?	Eltern, Königin Viktoria
									es	¿Quiénes fueron los padres de la reina Victoria?	padres, reina Victoria?
									it	Chi sono i genitori della regina Vittoria?	genitori, regina Vittoria
									fr	Qui étaient les parents de la reine Victoria?	parents, reine Victoria
									nl	Wie waren de ouders van Koningin Victoria?	ouders, Koningin Victoria
									hi_IN	महारानी विक्टोरिया के माता-पिता कौन थे?	महारानी विक्टोरियाे, माता-पिता
									ro	Cine au fost părinții reginei Victoria?	părinți, regina Victoria
			185	boolean	false	true	false		en	Did Che Guevara have children?	children, Che Guevara		PREFIX dbo: <http://dbpedia.org/ontology/> PREFIX res: <http://dbpedia.org/resource/> ASK WHERE { res:Che_Guevara dbo:child ?uri . }																					true
									pt_BR	Che Guevara teve filhos?	Che Guevara, filhos
									de	Hatte Che Guevara Kinder?	Kinder, Che Guevara
									es	¿Tuvo hijos el Che Guevara?	hijos, Che Guevara
									it	Che Guevara aveva dei figli?	figli, Che Guevara
									fr	Est-ce que Che Guevara a eu des enfants?	enfants, Che Guevara
									nl	Had Che Guevara kinderen?	kinderen, Che Guevara
									hi_IN	क्या चे ग्वेरा के बच्चे हैं?	चे ग्वेरा, बच्चे
									ro	Che Guevara a avut copii?	copii, Che Guevara
			186	boolean	false	true	false		en	Is Lake Baikal bigger than the Great Bear Lake?	Lake Baikal, bigger than, Great Bear Lake		PREFIX res: <http://dbpedia.org/resource/> PREFIX dbo: <http://dbpedia.org/ontology/> ASK WHERE { res:Lake_Baikal dbo:areaTotal ?a1 . res:Great_Bear_Lake dbo:areaTotal ?a2 . FILTER (?a1 > ?a2) }																					true
									pt_BR	O lago Baikal é maior do que o lago Great Bear?	lago Baikal, maior, lago Great Bear
									de	Ist der Baikalsee größer als der Große Bärensee?	Baikalsee, größer als, Großer Bärensee
									es	¿Es el lago Baikal mayor que el lago Great Bear?	lago Baikal mayor que lago Great Bear?
									it	Il lago Baikal è più grande le lago Great Bear?	lago Baikal, più grande, lago Great Bear
									fr	Est-ce que Lake Baikal est plus grand que le Great Bear Lake?	Lake Baikal, plus grand, Great Bear Lake
									nl	Is het Baikalmeer groter dan het Groot Berenmeer?	Baikalmeer, groter, Groot Berenmeer
									hi_IN	क्या जैक बेयर झील तुलना में बाइकाल झील बड़ी है?	जैक बेयर झील, बाइकाल झील, बड़ी
									ro	Lacul Baikal este mai mare decât lacul Great Bear?	lacul Baikal, mai mare decât, lacul Great Bear
			187	boolean	false	true	false		en	Did Kaurismäki ever win the Grand Prix at Cannes?	Kaurismäki, winner, Grand Prix at Cannes		ASK WHERE { <http://dbpedia.org/resource/Aki_Kaurismäki> <http://dbpedia.org/ontology/award> <http://dbpedia.org/resource/Grand_Prix_(Cannes_Film_Festival)> . }																					true
									pt_BR	Kaurismäki alguma vez venceu o Grand Prix de Cannes?	Kaurismäki, vencedor, Grand Prix de Cannes
									fa	آیا کوریسماکی تا بحال جایزه بزرگ جشنواره کن را برده است؟	کوریسماکی، جایزه بزرگ جشنواره کن
									de	Hat Kaurismäki jemals den Großen Preis der Jury in Cannes gewonnen?	Kaurismäki, Großer Preis der Jury, Cannes
									es	¿Gano Kaurismäki alguna vez el Gran Prix de Cannes?	Kaurismäki, ganador, Grand Prix de Cannes
									it	Kaurismäki ha mai vinto il Grand Prix a Cannes?	Kaurismäki, vincitore, Grand Prix a Cannes
									fr	A Kaurismäki gagné le Grand Prix de Cannes?	Kaurismäki, gagné, Grand Prix de Cannes
									nl	Heeft Kaurismäki ooit de Grand Prix op het filmfestival van Cannes gewonnen?	Kaurismäki, winnaar, Grand Prix, Cannes
									hi_IN	क्या कौरिस्म्की कभी कैनन्स में ग्रांड प्रिक्स जीते हैं?	कौरिस्म्की, कैनन्स, ग्रांड प्रिक्स, जीत
									ro	Kaurismäki a câștigat vreodată premiul Grand Prix la Cannes?	Kaurismäki, câștigător, Grand Prix la Cannes
			188	resource	true	true	false		en	Give me all books by William Goldman with more than 300 pages.	book, William Goldman, pages, more than 300		PREFIX dbo: <http://dbpedia.org/ontology/> PREFIX res: <http://dbpedia.org/resource/> PREFIX rdf: <http://www.w3.org/1999/02/22-rdf-syntax-ns#> SELECT DISTINCT ?uri WHERE { ?uri rdf:type dbo:Book . ?uri dbo:author res:William_Goldman . ?uri dbo:numberOfPages ?x . FILTER (?x > 300) }			uri							uri	http://dbpedia.org/resource/Marathon_Man_(novel)
									pt_BR	Liste todos os livros de William Goldman com mais de 300 páginas.	livro, William Goldman, mais de 300, páginas												uri	http://dbpedia.org/resource/Which_Lie_Did_I_Tell%3F
									de	Gib mir alle Bücher von William Goldman mit mehr als 300 Seiten.	Buch, William Goldman, Seiten, mehr als 300												uri	http://dbpedia.org/resource/Hype_and_Glory
									es	Dame todos los libros de Wiliam Goldman con más de 300 páginas.	libro, William Goldman, más de 300 páginas												uri	http://dbpedia.org/resource/Tinsel_(novel)
									it	Dammi tutti i libri di Wiliam Goldman con più di 300 pagine.	libro, Wiliam Goldman, pagine, più di 300												uri	http://dbpedia.org/resource/Boys_and_Girls_Together
									fr	Donnes-moi tous les livres de William Goldman avec plus de 300 pages.	livres, William Goldman, plus de 300 pages												uri	http://dbpedia.org/resource/Control_(novel)
									nl	Geef alle boeken van William Goldman met meer dan 300 pagina's.	boeken, William Goldman, meer dan 300 pagina's												uri	http://dbpedia.org/resource/The_Color_of_Light
									hi_IN	मुझे ३०० से अधिक पृष्ठों के साथ विलियम गोल्डमैन की किताबें की सूचि बतायें।	३०० से अधिक पृष्ठों, विलियम गोल्डमैन, किताबें												uri	http://dbpedia.org/resource/The_Princess_Bride
									ro	Dă-mi toate carțile de William Glodman cu mai mult de 300 de pagini.	carte, William Goldman, pagini, mai mult de 300												uri	http://dbpedia.org/resource/Wait_Till_Next_Year
																							uri	http://dbpedia.org/resource/Brothers_(Goldman_novel)
			189	resource	false	true	false		en	Where is Fort Knox located?	Fort Knox, located		SELECT DISTINCT ?uri WHERE { <http://dbpedia.org/resource/Fort_Knox> <http://dbpedia.org/property/location> ?uri . }			uri							uri	http://dbpedia.org/resource/Kentucky
									pt_BR	Onde está localizado o Fort Knox?	localizado, Fort Knox
									fa	فورت ناکس در کجا واقع شده است؟	فورت ناکس، واقع
									de	Wo liegt Fort Knox?	Fort Knox, liegen
									es	¿Donde se encuentra el Fort Knox?	Fort Knox, se encuentra, estado americano
									it	Dove si trova Fort Knox?	Fort Knox, trovarsi
									fr	Dans quel état américain se trouve Fort Knox?	état américain, Fort Knox
									nl	Waar ligt Fort Knox?	Fort Knox, ligt
									hi_IN	फोर्ट नॉक्स कहां स्थित है?	फोर्ट नॉक्स, स्थित
									ro	În ce stat american este situat Fort Knox?	Fort Knox, situat, stat american
			190	resource	false	false	false		en	In which U.S. state is Fort Knox located?	Fort Knox, located, U.S. state		PREFIX dbo: <http://dbpedia.org/ontology/> PREFIX dbp: <http://dbpedia.org/property/> PREFIX res: <http://dbpedia.org/resource/> SELECT DISTINCT ?uri WHERE { res:Fort_Knox dbp:location ?uri . ?uri dbo:country res:United_States . }			uri							uri	http://dbpedia.org/resource/Kentucky
									pt_BR	Em que estado dos EUA fica o Fort Knox?	estado dos EUA, Fort Knox
									de	In welchem US-Bundesstaat liegt Fort Knox?	Fort Knox, liegen, US-Bundesstaat
									es	¿En qué estado american se encuentra Fort Knox?	Fort Knox, se encuentra, estado americano
									it	In quale stato americano si trova Fort Knox?	Fort Knox, trovarsi, stato americano
									fr	Dans quel état américain se trouve Fort Knox?	état américain, Fort Knox
									nl	In welke staat van de Verenigde Staten ligt Fort Knox?	Fort Knox, staat van de Verenigde Staten, ligt
									hi_IN	सैयुक्त राज्य के किस राज्य में फोर्ट नॉक्स स्थित है?	सैयुक्त राज्य, फोर्ट नॉक्स, स्थित
			191	resource	false	true	false		en	Where is Syngman Rhee buried?	where, Syngman Rhee, buried		SELECT DISTINCT ?uri WHERE { <http://dbpedia.org/resource/Syngman_Rhee> <http://dbpedia.org/ontology/restingPlace> ?uri . }			uri							uri	http://dbpedia.org/resource/Seoul_National_Cemetery
									pt_BR	Onde está enterrado Syngman Rhee?	enterrado, Syngman Rhee
									fa	ایسونگمن ری گجا دفن شده است؟	ایسونگمن ری، دفن
									de	Wo liegt Syngman Rhee begraben?	Syngman Rhee, begraben
									es	¿Dónde está enterrado Syngman Rhee?	Dónde, enterrado, Syngman Rhee
									it	Dove è sepolto Syngman Rhee?	dove, sepolto, Syngman Rhee
									fr	Où est enterré Syngman Rhee?	lieu d'enterrement, Syngman Rhee
									nl	Waar ligt Syngman Rhee begraven?	Syngman Rhee, begrafplaats
									hi_IN	सिन्गमैन र्ही कहाँ दफनाया गया है?	सिन्गमैन र्ही, दफनाया
									ro	Unde este înmormântat Syngman Rhee?	unde, înmormântat, Syngman Rhee
			192	resource	false	true	false		en	What is the timezone in San Pedro de Atacama?	timezone, San Pedro de Atacama		SELECT DISTINCT ?uri WHERE { <http://dbpedia.org/resource/San_Pedro_de_Atacama> <http://dbpedia.org/ontology/timeZone> ?uri . }			uri							uri	http://dbpedia.org/resource/Time_in_Chile
									pt_BR	Qual é o fuso horário de São Pedro de Atacama?	fuso horário, São Pedro de Atacama
									fa	منطقه زمانی در San Pedro de Atacama چیست؟	منطقه زمانی، San Pedro de Atacama
									de	In welcher Zeitzone liegt San Pedro de Atacama?	Zeitzone, San Pedro de Atacama
									es	¿Cuál es la zona horaria en San Pedro de Atacama?	zona horaria, San Pedro de Atacama
									it	Qual è il fuso orario di San Pedro de Atacama?	fuso orario, San Pedro de Atacama
									fr	Quel est le fuseau horaire de San Pedro de Atacama?	fuseau horaire, San Pedro de Atacama
									nl	Wat is de tijdzone in San Pedro de Atacama?	tijdzone, San Pedro de Atacama
									hi_IN	सैन पेड्रो डे अटाकामा में समय क्षेत्र क्या है?	सैन पेड्रो डे अटाकामा, समय क्षेत्र
									ro	Care este fusul orar din San Pedro de Atacama?	fus orar, San Pedro de Atacama
			193	resource	false	true	false		en	To which artistic movement did the painter of The Three Dancers belong?	artistic movement, painter, The Three Dancers		SELECT DISTINCT ?uri WHERE { <http://dbpedia.org/resource/The_Three_Dancers> <http://dbpedia.org/ontology/author> ?person . ?person <http://dbpedia.org/ontology/movement> ?uri . }			uri							uri	http://dbpedia.org/resource/Cubism
									pt_BR	A que movimento artístico o pintor do quadro As Três Dançarinas pertencia?	movimento artístico, pintor, As Três Dançarinas												uri	http://dbpedia.org/resource/Surrealism
									fa	نقاش سه رقصنده به چه جنبش هنری تعلق دارد؟	نقاش، سه رقصنده، جنبش هنری
									de	Welcher Stilrichtung gehörte der Maler der Drei Tänzer an?	Drei Tänzer, Maler, Stilrichtung
									es	¿A qué estilo artístico pertenece el pinto de Los Tres Bailarines?	estilo artístico, pintor, Los Tres Bailarines
									it	A quale movimento artistico apparteneva il pittore de I tre ballerini?	movimento artistico, pittore, I tre ballerini
									fr	A quel mouvement artistisque appartient le peintre de Les Trois Danceurs?	mouvement artistique, peintre, les trois danceurs
									nl	Tot welke artistieke stijl behoort de schilder van de Drie Dansers?	Drie Dansers, schilder, stijl
									hi_IN	द थ्री डांसर्स के चित्रकार किस कलात्मक आंदोलन से हैं?	द थ्री डांसर्स, चित्रकार, कलात्मक आंदोलन
									ro	Cărui curent artistic îi aparține pictorul lucrării Trei dansatoare?	curent artistic, pictor, Trei dansatoare
			194	resource	false	true	false		en	Which scientist is known for the Manhattan Project and the Nobel Peace Prize?	scientist, known for, Manhattan Project, Nobel Peace Prize		PREFIX res: <http://dbpedia.org/resource/> PREFIX dbo: <http://dbpedia.org/ontology/> PREFIX rdf: <http://www.w3.org/1999/02/22-rdf-syntax-ns#> SELECT DISTINCT ?uri WHERE { ?uri dbo:knownFor res:Manhattan_Project . ?uri rdf:type dbo:Scientist . ?uri dbo:knownFor res:Nobel_Peace_Prize . }			uri							uri	http://dbpedia.org/resource/Joseph_Rotblat
									pt_BR	Que cientista é conhecido pelo Projeto Manhattan e pelo Prêmio Nobel da Paz?	cientista, conhecido, Projeto Manhattan, Prêmio Nobel da Paz
									de	Welcher Wissenschaftler ist bekannt für das Manhattan-Projekt und den Friedensnobelpreis?	Wissenschaftler, bekannt für, Manhattan-Projekt, Friedensnobelpreis
									es	¿Qué científicos son conocidos por el proyecto Manhattan y el premio Nobel de la Paz?	científico, conocidos, proyecto Manhattan, premio Nobel de la Paz
									it	Quale scienziato è conosciuto per il progetto Manhattan e per il premio Nobel per la pace?	scienziato, conosciuto, progetto Manhattan, premio Nobel per la pace
									fr	Quel chercheur est connu pour le projet Manhattan et le prix Nobel de la paix?	chercheur, projet Manhattan, prix Nobel de la paix
									nl	Welke wetenschaper staat bekend om het Manhattan Project en de Nobelprijs voor de Vrede?	wetenschaper, bekend om, Manhattan Project, Nobelprijs voor de Vrede
									hi_IN	कौन सा वैज्ञानिक मैनहट्टन प्रोजेक्ट और नोबेल शांति पुरस्कार के लिए जाना जाता है?	वैज्ञानिक, मैनहट्टन प्रोजेक्ट, नोबेल, शांति पुरस्कार
									ro	Care om de știință este cunoscut pentru proiectul Manhattan și pentru premiul Nobel pentru pace?	om de știință, cunoscut pentru, proiect Manhattan, premiul Nobel pentru pace
			195	resource	false	true	false		en	Show me all books in Asimov's Foundation series.	books, Asimov, Foundation series		SELECT DISTINCT ?uri WHERE { ?uri <http://dbpedia.org/ontology/series> <http://dbpedia.org/resource/Foundation_series> . }			uri							uri	http://dbpedia.org/resource/Foundation's_Edge
									pt_BR	Mostre-me todos os livros de Asimov da série Fundação.	livros, Asimov, série Fundação												uri	http://dbpedia.org/resource/Second_Foundation
									fa	مجموعه کتاب های آسیموف چند کتاب دارد؟	مجموعه کتاب های، آسیموف، کتاب												uri	http://dbpedia.org/resource/Foundation_(Isaac_Asimov_novel)
									de	Zeig mir alle Bücher in Asimovs Foundation-Serie.	Asimov, Foundation-Serie, Bücher												uri	http://dbpedia.org/resource/Foundation_and_Chaos
									es	Muéstrame todos los libros en la serie Fundación de Asimov	libros, serie Fundación Asimov												uri	http://dbpedia.org/resource/Foundation's_Triumph
									it	Mostrami tutti i libri del Ciclo della Fondazione di Asimov	libri, Ciclo della Fondazione, Asimov												uri	http://dbpedia.org/resource/The_Originist
									fr	Montres-moi tous les livres du Cycle de Fondation d'Asimov.	livres, Cycle de Fondation, Asimov												uri	http://dbpedia.org/resource/Prelude_to_Foundation
									nl	Toon alle boeken die bij de Foundation-serie horen.	boeken, Foundation-serie												uri	http://dbpedia.org/resource/Foundation's_Fear
									hi_IN	असिमोव की फाउंडेशन श्रृंखला की सारी पुस्तकों की सूचि दिखाएं।	असिमोव, फाउंडेशन श्रृंखला, पुस्तकों												uri	http://dbpedia.org/resource/Foundation_and_Earth
									ro	Arată-mi toate cărțile din seria Fundația de Asimov	cărți, seria Fundația, Asimov												uri	http://dbpedia.org/resource/Forward_the_Foundation
																							uri	http://dbpedia.org/resource/Foundation_and_Empire
			196	resource	true	false	false		en	Give me all cities in New Jersey with more than 100000 inhabitants.	New Jersey, city, inhabitants, more than 100000		PREFIX dbo: <http://dbpedia.org/ontology/> PREFIX dbp: <http://dbpedia.org/property/> PREFIX res: <http://dbpedia.org/resource/> PREFIX rdf: <http://www.w3.org/1999/02/22-rdf-syntax-ns#> SELECT DISTINCT ?uri WHERE { ?uri rdf:type dbo:City . ?uri dbo:isPartOf res:New_Jersey . ?uri dbp:populationTotal ?inhabitants . FILTER (?inhabitants > 100000) . }			uri							uri	http://dbpedia.org/resource/Newark,_New_Jersey
									pt_BR	Liste todas as cidades em New Jersey com mais de 100000 habitantes.	cidade, New Jersey, mais de 100000, habitantes												uri	http://dbpedia.org/resource/Jersey_City,_New_Jersey
									de	Gib mir alle Städte in New Jersey, die mehr als 100000 Einwohner haben.	New Jersey, Stadt, Einwohner, mehr als 100000												uri	http://dbpedia.org/resource/Elizabeth,_New_Jersey
									es	Dame todas las cuidades en New Jersey que tengan más de 100000 habitantes.	New Jersey, ciudad, habitantes, más de 100000												uri	http://dbpedia.org/resource/Paterson,_New_Jersey
									it	Dammi tutte le città del New Jersey con più di 100000 abitanti.	New Jersey, città, abitanti, più di 100000
									fr	Donnes-moi toutes les villes du New Jersey avec plus de 100000 habitants.	New Jersey, villes, habitants, plus de 100000
									nl	Geef alle steden in New Jersey met meer dan 100000 inwoners.	New Jersey, stad, inwoners, meer dan 100000
									hi_IN	मुझे न्यू जर्सी के १००००० से अधिक निवासियों के साथ सभी शहरों की सूचि बतायें।	न्यू जर्सी, १००००० से अधिक निवासि, शहर
			197	resource	true	true	false		en	Which museum in New York has the most visitors?	museum, New York, the most visitors		SELECT DISTINCT ?uri WHERE { ?uri <http://www.w3.org/1999/02/22-rdf-syntax-ns#type> <http://dbpedia.org/ontology/Museum> . ?uri <http://dbpedia.org/ontology/location> <http://dbpedia.org/resource/New_York_City> . ?uri <http://dbpedia.org/ontology/numberOfVisitors> ?num . } ORDER BY DESC(?num) OFFSET 0 LIMIT 1			uri							uri	http://dbpedia.org/resource/Museum_of_Motherhood
									pt_BR	Que museu de Nova York tem mais visitantes?	museu, Nova York, mais visitantes
									fa	کدام موزه در نیویورک بیشترین بازدید کننده را دارد؟	موزه، نیویورک، بیشترین بازدید کننده
									de	Welches Museum in New York hat die meisten Besucher?	Museum, New York, die meisten Besucher
									es	¿Qué museo en Nueva York tiene el mayor numero de visitantes?	museo Nueva York, mayor numero visitantes
									it	Quale museo di New York ha il maggior numero di visitatori?	museo, New York, maggior numero di visitatori
									fr	Quel musée de New York a le plus de visiteurs?	musée, New York, nombre maximal de visiteurs
									nl	Welk museum in New York heeft de meeste bezoekers?	museum, New York, de meeste bezoekers
									hi_IN	न्यूयॉर्क में कौन से संग्रहालय में सबसे अधिक आगंतुक हैं?	न्यूयॉर्क, संग्रहालय, सबसे अधिक आगंतुक
									ro	Care muzeu din New York are cei mai mulți vizitatori?	muzeu, New York, cei mai mulți vizitatori
			198	number	false	true	false		en	How high is the Yokohama Marine Tower?	high, Yokohama Marine Tower		PREFIX dbo: <http://dbpedia.org/ontology/> PREFIX res: <http://dbpedia.org/resource/> SELECT DISTINCT ?num WHERE { res:Yokohama_Marine_Tower dbo:height ?num . }			c										literal	106.07
									pt_BR	Qual a altura da torre Yokohama Marine?	altura, torre Yokohama Marine
									de	Wie hoch ist der Yokohama Marine Tower?	hoch, Yokohama Marine Tower
									es	¿Cómo de alta el la torre Yokohama Marine?	alta, torre Yokohama Marine?
									it	Quanto è alta la torre Yokohama Marine?	altezza, torre Yokohama Marine
									fr	Quelle est la hauteur de la tour de Yokohama?	hauteur, tour de Yokohama
									nl	Hoe hoog is de Yokohama Marine Tower?	hoog, Yokohama Marine Tower
									hi_IN	योकोहामा समुद्री टॉवर कितना ऊँचा है?	योकोहामा समुद्री टॉवर, ऊँचा
									ro	Cât de înalt este Turnul Marine Yokohama?	înalt, Turnul Marine Yokohama
			199	boolean	true	true	false		en	Does the new Battlestar Galactica series have more episodes than the old one?	new BattleStar Galactica series, episodes, more, old Battle Star Galactica series		PREFIX dbo: <http://dbpedia.org/ontology/> PREFIX res: <http://dbpedia.org/resource/> ASK WHERE { <http://dbpedia.org/resource/Battlestar_Galactica_%281978_TV_series%29> dbo:numberOfEpisodes ?x . <http://dbpedia.org/resource/Battlestar_Galactica_%282004_TV_series%29> dbo:numberOfEpisodes ?y . FILTER (?y > ?x) }																					false
									pt_BR	A nova série Battlestar Galactica tem mais episódios do que a anterior?	nova série Battlestar Galactica, mais episódios do que a anterior
									de	Hat die neue Battlestar-Galactica-Serie mehr Episoden als die alte?	neue Battlestar-Galactica-Serie, Episoden, mehr, alte Battlestar-Galactica-Serie
									es	¿Tiene la nueve serie de Battlestar-Galactica más episodios que la anterior?	nueve serie de Battlestar-Galactica, más episodios que la anterior
									it	La nuova serie di Battlestar Galactica ha più episodi di quella precedente?	nuova serie di Battlestar Galactica, più episodi della precedente
									fr	A la nouvelle série de Battlestar Galactica plus d'épisodes que l'ancienne?	nouvelle série de Battlestar Galactica, plus d'épisodes que l'ancienne
									nl	Heeft de nieuwe Battlestar Galactica-serie meer afleveringen dan de oude?	nieuwe Battlestar Galactica-serie, meer afleveringen, oude Battlestar Galactica-serie
									hi_IN	क्या नई बट्ट्लैस्टार गैलेक्टिका सीरीज़ के पुराने संस्करणों की तुलना में अधिक एपिसोड हैं?	नई बट्ट्लैस्टार गैलेक्टिका सीरीज़, पुराने संस्करणों, अधिक एपिसोड
			200	resource	true	true	false		en	Who is the youngest Darts player?	Darts player, youngest		PREFIX dbo: <http://dbpedia.org/ontology/> PREFIX rdf: <http://www.w3.org/1999/02/22-rdf-syntax-ns#> SELECT DISTINCT ?uri WHERE { ?uri rdf:type dbo:DartsPlayer . ?uri dbo:birthDate ?date . } ORDER BY DESC(?date) OFFSET 0 LIMIT 1			uri							uri	http://dbpedia.org/resource/Max_Hopp
									pt_BR	Quem é o jogador mais jovem de dardos?	jogador mais jovem de dardos
									de	Wer ist der jüngste Dartspieler?	Dartspieler, jüngster
									es	¿Quién es el jugador mas jóven de dardos?	jugador más jóven dardos
									it	Chi è il giocatore di freccette più giovane?	giocatore di freccette, più giovane
									fr	Quel est le joueur de fléchettes le plus jeune?	jouer de fléchettes, plus jeune
									nl	Wie is de jongste dartsspeler?	jongste Darts speeler
									hi_IN	सबसे छोटा डार्ट्स खिलाड़ी कौन है?	सबसे छोटा, डार्ट्स खिलाड़ी
									ro	Cine este cel mai tânăr jucător de Darts?	jucător de Darts, cel mai tânăr
			201	resource	false	true	false		en	Who developed the video game World of Warcraft?	video game, World of Warcraft, develop		PREFIX dbo: <http://dbpedia.org/ontology/> PREFIX res: <http://dbpedia.org/resource/> SELECT DISTINCT ?uri WHERE { res:World_of_Warcraft dbo:developer ?uri . }			uri							uri	http://dbpedia.org/resource/Blizzard_Entertainment
									pt_BR	Quem desenvolveu o jogo World of Warcraft?	desenvolver, jogo, World of Warcraft
									de	Wer hat das Videospiel World of Warcraft entwickelt?	Videospiel, World of Warcraft, entwickeln
									es	¿Quién desarrolló el videojuego Warcraft?	videojuego, Warcraft, desarrollar
									it	Chi ha creato il videogioco World of Warcraft?	videogioco, World of Warcraft, creare
									fr	Qui a développé World of Warcraft?	développé, World of Warcraft
									nl	Wie heeft het videospel World of Warcraft ontwikkeld?	World of Warcraft, ontwikkelaar
									hi_IN	वर्ल्ड ऑफ़ वारक्राफ़्ट गेम किसने विकसित किया हैं?	वर्ल्ड ऑफ़ वारक्राफ़्ट, गेम, विकसित
			202	resource	false	true	false		en	Who was the pope that founded the Vatican Television?	pope, founded, Vatican Television		PREFIX dbo: <http://dbpedia.org/ontology/> PREFIX res: <http://dbpedia.org/resource/> PREFIX rdf: <http://www.w3.org/1999/02/22-rdf-syntax-ns#> SELECT ?uri WHERE { ?uri rdf:type dbo:Pope . res:Vatican_Television_Center dbo:foundedBy ?uri . }			uri							uri	http://dbpedia.org/resource/Pope_John_Paul_II
									pt_BR	Qual papa fundou a Televisão do Vaticano?	papa, fundou, Televisão do Vaticano
									de	Welcher Papst hat das Vatikanische Fernsehen gegründet?	Papst, gegründet, Vatikanisches Fernsehen
									es	¿Quien fue el papa que fundo la televisión Vaticana?	papa, fundo, televisión Vaticana
									it	Quale papa ha fondato la televisione vaticana?	papa, fondare, televisione vaticana
									fr	Quel pape est le fondateur de la télé du Vatican?	pape, fondateur, télé du Vatican
									nl	Welk paus richtte de Vaticaanse televisie op?	paus, oprichter, Vaticaanse televisie
									hi_IN	किस पोप ने वेटिकन टेलीविजन की स्थापना की थी?	पोप, वेटिकन टेलीविजन, स्थापना
									ro	Cine a fost papa care a creat televiziunea din Vatican?	papa, fondat, televiziunea din Vatican
			203	resource	false	true	false		en	Who composed the music for Harold and Maude?	Harold and Maude, compose, music		PREFIX res: <http://dbpedia.org/resource/> PREFIX dbo: <http://dbpedia.org/ontology/> SELECT DISTINCT ?uri WHERE { res:Harold_and_Maude dbo:musicComposer ?uri . }			uri							uri	http://dbpedia.org/resource/Cat_Stevens
									pt_BR	Quem compôs a música para Harold e Maude?	compositor, música, Harold e Maude
									de	Wer hat die Musik für Harold und Maude komponiert?	Harold und Maude, komponieren, Musik
									es	¿Quién compuso la música para Harold y Maude?	Harold y Maude, música, compositor
									it	Chi ha composto la musica per Harold e Maude?	Harold e Maude, compositore, musica
									fr	Qui a composé la musique de Harold et Maude?	composé, musique, Harold et Maude
									nl	Wie componeerde de muziek voor Harold and Maude	componist, Harold and Maude
									hi_IN	हेरोल्ड एंड मॉड के लिए संगीत किसने बनाया था?	हेरोल्ड एंड मॉड, संगीत, बनाया
			204	resource	false	true	false		en	Give me all members of Prodigy.	member, Prodigy		SELECT DISTINCT ?uri WHERE { <http://dbpedia.org/resource/The_Prodigy> <http://dbpedia.org/ontology/bandMember> ?uri . }			uri							uri	http://dbpedia.org/resource/Maxim_(musician)
									pt_BR	Liste todos os membros da Prodigy	membros, Prodigy												uri	http://dbpedia.org/resource/Liam_Howlett
									fa	تمام اعضای پرادیجی را لیست کن.	اعضا، پرادیجی												uri	http://dbpedia.org/resource/Keith_Flint
									de	Gib mir alle Bandmitglieder von Prodigy.	Bandmitglied, Prodigy
									es	Dame todos los miembros de la banda Prodigy.	miembros de la banda Prodigy
									it	Dammi tutti i membri dei Prodigy.	membri, Prodigy
									fr	Donne-moi tous les membres de Prodigy.	members, Prodigy
									nl	Noem alle leden van Prodigy.	leden, Prodigy
									hi_IN	मुझे प्रोडिजी के सभी सदस्यों की सूचि बतायें।	प्रोडिजी, सदस्यों
									ro	Dă-mi toții membrii Prodigy.	membru, Prodigy
			205	resource	false	true	false		en	Who is starring in Spanish movies produced by Benicio del Toro?	starring, Spanish movies, produced, Benicio del Toro		SELECT DISTINCT ?uri WHERE { ?film <http://www.w3.org/1999/02/22-rdf-syntax-ns#type> <http://dbpedia.org/ontology/Film> . ?film <http://dbpedia.org/ontology/country> <http://dbpedia.org/resource/Spain> . ?film <http://dbpedia.org/ontology/producer> <http://dbpedia.org/resource/Benicio_del_Toro> . ?film <http://dbpedia.org/ontology/starring> ?uri . ?uri <http://www.w3.org/1999/02/22-rdf-syntax-ns#…			uri							uri	http://dbpedia.org/resource/Benicio_del_Toro
									pt_BR	Quem atua nos filmes espanhois produzidos por Benicio del Toro?	atua, filmes espanhois, produzidos, Benicio del Toro
									fa	چه کسی در فیلم های اسپانیایی تولید شده توسط بنیسیو دل تورو بازی می کند؟	فیلم های اسپانیایی، تولید، بنیسیو دل تورو، بازی
									de	Wer spielt alles in spanischen Filmen produziert von Benicio del Toro mit?	mitspielen, spanische Filme, produziert, Benicio del Toro
									es	¿Quien protagoniza peliculas españolas producidas por Benicio del Toro?	protagonista, peliculas españolas, productor, Benicio del Toro
									it	Chi recita nei film spagnoli prodotti da Benicio del Toro?	attori, film spagnoli, prodotti, Benicio del Toro
									fr	Quels acteurs jouent dans des films dirigés par Benicio del Toro?	acteurs, directeur, Benicio del Toro
									nl	Wie speeld in Spaanse films geproduceerd door Benicio del Toro?	speeld, Spaanse films, geproduceerd, Benicio del Toro
									hi_IN	बेनिसीओ डेल टोरो द्वारा निर्मित स्पेनिश फिल्मों में कौन अभिनय करता है?	बेनिसीओ डेल टोरो, निर्मित, स्पेनिश फिल्म, अभिनय
									ro	Cine sunt protagoniști în filmele spaniole produse de Benicio del Toro?	protagoniști, filmele spaniole, produse, Benicio del Toro
			206	resource	false	true	false		en	Which subsidiary of TUI Travel serves both Glasgow and Dublin?	subsidiary, TUI Travel, serve, Glasgow, Dublin		SELECT DISTINCT ?uri WHERE { <http://dbpedia.org/resource/TUI_Travel> <http://dbpedia.org/ontology/subsidiary> ?uri . ?uri <http://dbpedia.org/ontology/targetAirport> <http://dbpedia.org/resource/Glasgow_Airport> . ?uri <http://dbpedia.org/ontology/targetAirport> <http://dbpedia.org/resource/Dublin_Airport> . }			uri							uri	http://dbpedia.org/resource/Thomson_Airways
									pt_BR	Qual subsidiária da TUI Travel vôa para Glasgow e Dublin?	subsidiária, TUI Travel, voa, Glasgow, Dublin
									fa	چه شرکت های تابعی از تی.یو.آی. تراول به هر دوی گلاسگو و دوبلین سرویس دارند؟	شرکت های تابعی، تی.یو.آی. تراول، گلاسگو، دوبلین، سرویس
									de	Welche Tochtergesellschaft von TUI Travel fliegt sowohl Glasgow als auch Dublin an?	Tochtergesellschaft, TUI Travel, anfliegen, Glasgow, Dublin
									es	¿Qué subsidiario de TUI Travel vuela en Glasgow y en Dublin?	subsidiario, TUI Travel, vuela, Glasgow, Dublin
									it	Quale società sussidiaria di TUI Travel serve sia Dortmund che Dublino?	società sussidiaria di TUI Travel, servire, Glasgow, Dublin
									fr	Quelle subsidiaire de TUI Travel vole sur Glasgow et Dublin?	subsidiaire, TUI Travel, vole sur, Glasgow, Dublin
									nl	Welke dochteronderneming van TUI Travel bedient zowel Glasgow en Dublin?	dochteronderneming, TUI Travel, bedient, Glasgow, Dublin
									hi_IN	टीयूआई ट्रैवल की कौन सी सहायक कंपनी ग्लासगो और डबलिन को सेवाएं देती है?	टीयूआई ट्रैवल, सहायक कंपनी, ग्लासगो, डबलिन, सेवा?
									ro	Care filială a TUI Travel deservește atât Glasgow cât și Dublin?	filială, TUI Travel, deservește, Glasgow, Dublin
			207	resource	false	true	false		en	In which country is Mecca located?	country, located, Mecca		PREFIX res: <http://dbpedia.org/resource/> PREFIX dbo: <http://dbpedia.org/ontology/> SELECT DISTINCT ?uri WHERE { res:Mecca dbo:country ?uri . }			uri							uri	http://dbpedia.org/resource/Saudi_Arabia
									pt_BR	Em qual país está localizada Meca?	país, locallizada, Meca
[truncated: 73 more rows]
